# Supplementary material for: Prognostic value of B cells in cutaneous melanoma
Source: Genome Med. 2019 May 28;11:36. doi: 10.1186/s13073-019-0647-5 (PMC6540526; doi:10.1186/s13073-019-0647-5)
Supplement: Supplementary file 2 — Table S1. All count/nucleotide/diversity measurements for each sample. Table S2 Classification information for each sample. (XLSX 560 kb) [file 13073_2019_647_MOESM2_ESM.xlsx]

## Sheet: Supplemental_table1
legacy_sample_id	analysis_id	aliquot_id	cohort	sample	total_counts.IGHA	mean_cdr3_aa_len.IGHA	w_mean_cdr3_aa_len.IGHA	mean_v_region_ident.IGHA	w_mean_v_region_ident.IGHA	evenness_by_seq.IGHA	shannon_entropy_by_seq.IGHA	true_div_by_seq.IGHA	gini_simpson_by_seq.IGHA	top_clone_prop_by_seq.IGHA	second_top_clone_by_seq.IGHA	num_unique_seq.IGHA	evenness_by_clus.IGHA	shannon_entropy_by_clus.IGHA	true_div_by_clus.IGHA	gini_simpson_by_clus.IGHA	top_clone_prop_by_clus.IGHA	second_top_clone_by_clus.IGHA	num_unique_clus.IGHA	total_counts.IGHG	mean_cdr3_aa_len.IGHG	w_mean_cdr3_aa_len.IGHG	mean_v_region_ident.IGHG	w_mean_v_region_ident.IGHG	evenness_by_seq.IGHG	shannon_entropy_by_seq.IGHG	true_div_by_seq.IGHG	gini_simpson_by_seq.IGHG	top_clone_prop_by_seq.IGHG	second_top_clone_by_seq.IGHG	num_unique_seq.IGHG	evenness_by_clus.IGHG	shannon_entropy_by_clus.IGHG	true_div_by_clus.IGHG	gini_simpson_by_clus.IGHG	top_clone_prop_by_clus.IGHG	second_top_clone_by_clus.IGHG	num_unique_clus.IGHG	total_counts.IGHM	mean_cdr3_aa_len.IGHM	w_mean_cdr3_aa_len.IGHM	mean_v_region_ident.IGHM	w_mean_v_region_ident.IGHM	evenness_by_seq.IGHM	shannon_entropy_by_seq.IGHM
TCGA-3N-A9WB-06A-11R-A38C-07	9fcfb075-8e2d-4203-8c2a-81a681eba69c	4c243ea9-dfe1-42f0-a887-3c901fb38542	SKCM	9fcfb075-8e2d-4203-8c2a-81a681eba69c-140509_UNC12-SN629_0368_BC4241ACXX_3_ACTTGA	133.128	23	23	87.44	87.44	NA	0	1	0	1	NA	1	NA	0	1	0	1	NA	1	NA	NA	NA	NA	NA	NA	NA	NA	NA	NA	NA	NA	NA	NA	NA	NA	NA	NA	NA	NA	NA	NA	NA	NA	NA	NA
TCGA-3N-A9WC-06A-11R-A38C-07	fb23a25a-11c1-49b4-9eb0-d8dd86f0d69d	a64ae1f5-a189-4173-be13-903bd7637869	SKCM	fb23a25a-11c1-49b4-9eb0-d8dd86f0d69d-140509_UNC12-SN629_0368_BC4241ACXX_3_CCGTCC	5127.41	16.5294	16.1335	90.4	90.0654	0.833825	2.36241	10.6165	0.867646	0.260255	0.167474	17	0.839419	2.27319	9.71032	0.861676	0.260255	0.167474	15	22013.4	17.0278	16.9294	96.1957	95.5558	0.78114	3.34067	28.2381	0.911036	0.261992	0.0773149	72	0.803742	3.22086	25.0497	0.909038	0.261992	0.0793503	55	2101.66	16.8889	15.604	94.36	94.9158	0.842285	1.85069
TCGA-3N-A9WD-06A-11R-A38C-07	fa4e8834-6d9c-4545-a33a-60f5196b40b0	ac19f7cf-670b-4dcc-a26b-db0f56377231	SKCM	fa4e8834-6d9c-4545-a33a-60f5196b40b0-140516_UNC12-SN629_0369_AC4GGKACXX_6_TTAGGC	125.703	19.5	19.1706	88.945	90.5096	0.659098	0.456852	1.57909	0.283004	0.82939	0.17061	2	0.659098	0.456852	1.57909	0.283004	0.82939	0.17061	2	2399.86	19.75	19.9771	96.15	96.5274	0.894787	2.48088	11.9517	0.895732	0.185098	0.172324	16	0.886113	2.3385	10.3657	0.879402	0.185098	0.176	14	NA	NA	NA	NA	NA	NA	NA
TCGA-BF-A1PU-01A-11R-A18S-07	b916f197-d85d-4871-9683-9b984f002747	9ff4d588-da73-4e26-975d-2b098fe74984	SKCM	b916f197-d85d-4871-9683-9b984f002747-120118_UNC12-SN629_0179_AC0C6CACXX_1_TAGCTT	NA	NA	NA	NA	NA	NA	NA	NA	NA	NA	NA	NA	NA	NA	NA	NA	NA	NA	NA	251.687	14	14	88.03	88.03	NA	0	1	0	1	NA	1	NA	0	1	0	1	NA	1	NA	NA	NA	NA	NA	NA	NA
TCGA-BF-A1PV-01A-11R-A18U-07	32053c2a-d9c1-4117-bd05-f5da5e28b4df	a57841bb-fa68-4d84-85e0-2d5e4f3ce828	SKCM	32053c2a-d9c1-4117-bd05-f5da5e28b4df-120220_UNC9-SN296_0273_BD0MN6ACXX_2_TAGCTT	NA	NA	NA	NA	NA	NA	NA	NA	NA	NA	NA	NA	NA	NA	NA	NA	NA	NA	NA	929	16.8	16.1988	89.566	89.9562	0.952548	1.53307	4.63236	0.771635	0.287059	0.249412	5	0.952548	1.53307	4.63236	0.771635	0.287059	0.249412	5	NA	NA	NA	NA	NA	NA	NA
TCGA-BF-A1PX-01A-12R-A18T-07	047bd731-4bb4-400b-875c-1c44e9ed128d	73b2e2ac-aafd-40e7-8759-ffa226f04a3b	SKCM	047bd731-4bb4-400b-875c-1c44e9ed128d-120118_UNC15-SN850_0163_AD0J87ACXX_7_TAGCTT	2649.2	17.1667	15.598	88.5517	85.2748	0.644667	1.15509	3.1743	0.551158	0.643801	0.136144	6	0.698656	1.12444	3.0785	0.550052	0.643801	0.136144	5	39510.5	17.7375	17.6561	90.9379	90.6766	0.911491	3.99418	54.2811	0.9753	0.0590394	0.0536598	80	0.905943	3.78176	43.8931	0.968304	0.0833449	0.0590394	65	NA	NA	NA	NA	NA	NA	NA
TCGA-BF-A1PZ-01A-11R-A18S-07	1734e28e-8a15-4a9c-b6f7-1777617e21aa	27bf4227-d8a9-4048-af7e-01c6d5d0e777	SKCM	1734e28e-8a15-4a9c-b6f7-1777617e21aa-111122_UNC15-SN850_0148_AC05D7ACXX_1_ATCACG	NA	NA	NA	NA	NA	NA	NA	NA	NA	NA	NA	NA	NA	NA	NA	NA	NA	NA	NA	1536.83	19.75	20.155	94.5175	94.4434	0.976345	2.03025	7.61601	0.861584	0.216745	0.151526	8	0.976345	2.03025	7.61601	0.861584	0.216745	0.151526	8	NA	NA	NA	NA	NA	NA	NA
TCGA-BF-A1Q0-01A-21R-A18S-07	068ae21e-cc8c-4772-9011-993e1ff9742d	c8600bba-b4bd-400e-ab67-03d66be9da31	SKCM	068ae21e-cc8c-4772-9011-993e1ff9742d-111122_UNC15-SN850_0148_AC05D7ACXX_1_TTAGGC	103.049	17	17	88.89	88.89	NA	0	1	0	1	NA	1	NA	0	1	0	1	NA	1	2567.64	17	16.041	87.4067	87.591	0.880064	2.38326	10.8402	0.873835	0.283671	0.101618	15	0.792628	1.74158	5.70637	0.7272	0.487458	0.101618	9	NA	NA	NA	NA	NA	NA	NA
TCGA-BF-A3DJ-01A-11R-A20F-07	820a4666-6d25-4d59-a00d-46c4d45f0b7f	4a78ff4a-a904-4fbe-abe6-2aa51b15c0ab	SKCM	820a4666-6d25-4d59-a00d-46c4d45f0b7f-120327_UNC10-SN254_0342_BC0LCYACXX_1_GGCTAC	1068.16	18.5	19.7437	90.355	91.8847	0.813271	0.563717	1.75719	0.376258	0.748739	0.251261	2	0.813271	0.563717	1.75719	0.376258	0.748739	0.251261	2	1710.56	18.1667	19.5331	87.0667	86.9712	0.887676	1.5905	4.90621	0.754989	0.400126	0.217391	6	0.887676	1.5905	4.90621	0.754989	0.400126	0.217391	6	NA	NA	NA	NA	NA	NA	NA
TCGA-BF-A3DL-01A-11R-A20F-07	78f87e69-bfbf-4dd3-90eb-b6cba7596598	2e00b580-b6b7-433e-88e8-69a75fae592f	SKCM	78f87e69-bfbf-4dd3-90eb-b6cba7596598-120327_UNC10-SN254_0342_BC0LCYACXX_1_TGACCA	NA	NA	NA	NA	NA	NA	NA	NA	NA	NA	NA	NA	NA	NA	NA	NA	NA	NA	NA	NA	NA	NA	NA	NA	NA	NA	NA	NA	NA	NA	NA	NA	NA	NA	NA	NA	NA	NA	NA	NA	NA	NA	NA	NA	NA
TCGA-BF-A3DM-01A-11R-A20F-07	4d2e0674-6630-41fd-8940-9d90cf4e0d7c	ca667c68-e9fb-4003-8639-5fa1d00a7a95	SKCM	4d2e0674-6630-41fd-8940-9d90cf4e0d7c-120327_UNC10-SN254_0342_BC0LCYACXX_2_CAGATC	NA	NA	NA	NA	NA	NA	NA	NA	NA	NA	NA	NA	NA	NA	NA	NA	NA	NA	NA	NA	NA	NA	NA	NA	NA	NA	NA	NA	NA	NA	NA	NA	NA	NA	NA	NA	NA	NA	NA	NA	NA	NA	NA	NA	NA
TCGA-BF-A3DN-01A-11R-A20F-07	dd66117d-e39b-4b23-919f-4730ff0f5619	bbdc1eec-bfa5-4be6-ac9b-80426e1f7fdd	SKCM	dd66117d-e39b-4b23-919f-4730ff0f5619-120327_UNC10-SN254_0342_BC0LCYACXX_2_CTTGTA	NA	NA	NA	NA	NA	NA	NA	NA	NA	NA	NA	NA	NA	NA	NA	NA	NA	NA	NA	NA	NA	NA	NA	NA	NA	NA	NA	NA	NA	NA	NA	NA	NA	NA	NA	NA	NA	NA	NA	NA	NA	NA	NA	NA	NA
TCGA-BF-A5EO-01A-12R-A27Q-07	162e37fc-340d-4002-8b75-9e848a426abe	51627bee-72ff-4b4d-8df1-df5043766d43	SKCM	162e37fc-340d-4002-8b75-9e848a426abe-130412_UNC10-SN254_0451_AC22EDACXX_5_ATCACG	4606.25	17.5	18.4641	92.747	94.7931	0.614347	1.41459	4.11478	0.632663	0.563665	0.182935	10	0.637658	1.40108	4.05957	0.632473	0.563665	0.182935	9	8287.04	18.0769	16.5638	91.5238	92.5733	0.531839	1.36414	3.91236	0.520525	0.68442	0.0635893	13	0.531839	1.36414	3.91236	0.520525	0.68442	0.0635893	13	365.101	21	21	87.32	87.32	NA	0
TCGA-BF-A5EP-01A-12R-A27Q-07	60e574aa-167a-442d-8642-e8426d5bb24b	97f5e1fa-9706-4237-9e18-437b59dea594	SKCM	60e574aa-167a-442d-8642-e8426d5bb24b-130412_UNC10-SN254_0451_AC22EDACXX_5_GATCAG	NA	NA	NA	NA	NA	NA	NA	NA	NA	NA	NA	NA	NA	NA	NA	NA	NA	NA	NA	NA	NA	NA	NA	NA	NA	NA	NA	NA	NA	NA	NA	NA	NA	NA	NA	NA	NA	NA	NA	NA	NA	NA	NA	NA	NA
TCGA-BF-A5EQ-01A-21R-A27Q-07	60be22e0-81e4-48ed-bd02-5e7388d1fd6c	66a4ff31-c95c-4c76-8e91-1ae3c76e313c	SKCM	60be22e0-81e4-48ed-bd02-5e7388d1fd6c-130412_UNC10-SN254_0451_AC22EDACXX_5_GTGGCC	3241.43	16	13.3303	89.8425	94.4596	0.661635	0.91722	2.50233	0.48084	0.693768	0.156528	4	0.661635	0.91722	2.50233	0.48084	0.693768	0.156528	4	40888.9	19.4026	19.815	94.6866	93.4368	0.7929	3.4442	31.3183	0.948011	0.118421	0.107896	77	0.83187	3.22034	25.0366	0.940713	0.12003	0.108376	48	NA	NA	NA	NA	NA	NA	NA
TCGA-BF-A5ER-01A-12R-A27Q-07	28b43c0f-510a-4498-b4b1-fcb644dca8ed	1a8747a6-dc84-4a6e-9d32-ebd2c517775e	SKCM	28b43c0f-510a-4498-b4b1-fcb644dca8ed-130412_UNC10-SN254_0451_AC22EDACXX_6_TTAGGC	NA	NA	NA	NA	NA	NA	NA	NA	NA	NA	NA	NA	NA	NA	NA	NA	NA	NA	NA	65.3031	14	14	91.88	91.88	NA	0	1	0	1	NA	1	NA	0	1	0	1	NA	1	NA	NA	NA	NA	NA	NA	NA
TCGA-BF-A5ES-01A-11R-A27Q-07	c68f8ca4-4af6-4ce1-9c33-a4256ce3d4b0	8b04f9ea-ffb8-4a51-a20e-64e6889f6d5f	SKCM	c68f8ca4-4af6-4ce1-9c33-a4256ce3d4b0-130412_UNC10-SN254_0451_AC22EDACXX_6_TAGCTT	NA	NA	NA	NA	NA	NA	NA	NA	NA	NA	NA	NA	NA	NA	NA	NA	NA	NA	NA	NA	NA	NA	NA	NA	NA	NA	NA	NA	NA	NA	NA	NA	NA	NA	NA	NA	NA	NA	NA	NA	NA	NA	NA	NA	NA
TCGA-BF-A9VF-01A-11R-A37K-07	6a9e9fd9-c001-4dc9-8e9e-c67d498c655d	9e04fd71-518e-4c8d-9eea-70df71afaaaf	SKCM	6a9e9fd9-c001-4dc9-8e9e-c67d498c655d-140424_UNC13-SN749_0344_AC3WUKACXX_6_GTCCGC	NA	NA	NA	NA	NA	NA	NA	NA	NA	NA	NA	NA	NA	NA	NA	NA	NA	NA	NA	NA	NA	NA	NA	NA	NA	NA	NA	NA	NA	NA	NA	NA	NA	NA	NA	NA	NA	NA	NA	NA	NA	NA	NA	NA	NA
TCGA-BF-AAOU-01A-12R-A39D-07	0a048392-98d0-4e3a-a337-d22aa3e16eb6	6e57fc3b-7e9d-4a9b-a1e7-77d4435c5b72	SKCM	0a048392-98d0-4e3a-a337-d22aa3e16eb6-140624_UNC15-SN850_0372_AC4L6NACXX_4_TAGCTT	6301.12	17.125	18.1897	90.1575	90.6244	0.554388	1.15282	3.1671	0.507399	0.68707	0.0985344	8	0.554388	1.15282	3.1671	0.507399	0.68707	0.0985344	8	77816	17.2821	17.6839	90.5441	92.6632	0.569324	2.08575	8.05065	0.771439	0.424478	0.159476	39	0.583033	2.07288	7.94772	0.770074	0.426034	0.159608	35	NA	NA	NA	NA	NA	NA	NA
TCGA-BF-AAOX-01A-11R-A39D-07	22a42ff8-03f5-4277-bdcd-9e728c419a99	ba2ba71d-2d57-4154-a712-84a3ef19247d	SKCM	22a42ff8-03f5-4277-bdcd-9e728c419a99-140603_UNC11-SN627_0360_AC4H72ACXX_3_CTTGTA	NA	NA	NA	NA	NA	NA	NA	NA	NA	NA	NA	NA	NA	NA	NA	NA	NA	NA	NA	380.784	17.6667	17.5776	84.7433	85.0917	0.977214	1.07358	2.92583	0.650171	0.42449	0.332653	3	0.977214	1.07358	2.92583	0.650171	0.42449	0.332653	3	NA	NA	NA	NA	NA	NA	NA
TCGA-BF-AAP0-06A-11R-A39D-07	1fdb5409-f459-4d63-9146-ce75c2aa804f	faf23517-4aeb-4ad0-8d86-cce2e3e89390	SKCM	1fdb5409-f459-4d63-9146-ce75c2aa804f-140603_UNC15-SN850_0369_BC4H6YACXX_4_CGATGT	4407.08	16.4286	16.0855	91.7979	91.4725	0.86106	2.27239	9.70253	0.872311	0.223779	0.167881	14	0.86106	2.27239	9.70253	0.872311	0.223779	0.167881	14	45388	17.0588	16.7376	93.2735	93.7413	0.759376	3.37364	29.1847	0.898039	0.297055	0.051456	85	0.77495	3.3142	27.5004	0.897247	0.297055	0.055902	72	NA	NA	NA	NA	NA	NA	NA
TCGA-BF-AAP1-01A-11R-A39D-07	53ae714a-0422-4c22-9380-a8402f108d6d	50b143bf-7283-468a-855b-63aadd98496a	SKCM	53ae714a-0422-4c22-9380-a8402f108d6d-140611_UNC13-SN749_0355_BC4K53ACXX_7_AGTCAA	NA	NA	NA	NA	NA	NA	NA	NA	NA	NA	NA	NA	NA	NA	NA	NA	NA	NA	NA	150.291	15	15	82.68	82.68	NA	0	1	0	1	NA	1	NA	0	1	0	1	NA	1	NA	NA	NA	NA	NA	NA	NA
TCGA-BF-AAP2-01A-11R-A40A-07	180640fb-eb34-48c6-9106-7e4968960a16	b43d4426-a4be-4b4d-9615-14e4b0c043f7	SKCM	180640fb-eb34-48c6-9106-7e4968960a16-140711_UNC12-SN629_0381_AC4M54ACXX_4_GCCAAT	NA	NA	NA	NA	NA	NA	NA	NA	NA	NA	NA	NA	NA	NA	NA	NA	NA	NA	NA	329.619	20	20.0696	94.855	94.5922	0.996501	0.690722	1.99515	0.497577	0.53481	0.46519	2	0.996501	0.690722	1.99515	0.497577	0.53481	0.46519	2	NA	NA	NA	NA	NA	NA	NA
TCGA-BF-AAP4-01A-11R-A40A-07	c78a4c96-84da-47d1-8ec1-15218467f525	2f479383-aae6-4537-8230-d095722078be	SKCM	c78a4c96-84da-47d1-8ec1-15218467f525-140711_UNC12-SN629_0381_AC4M54ACXX_3_ACTTGA	87.7695	21	21	89.67	89.67	NA	0	1	0	1	NA	1	NA	0	1	0	1	NA	1	1447.3	16.5	18.1636	88.9183	87.7537	0.865752	1.55122	4.71722	0.745748	0.386757	0.269802	6	0.865752	1.55122	4.71722	0.745748	0.386757	0.269802	6	NA	NA	NA	NA	NA	NA	NA
TCGA-BF-AAP6-01A-11R-A40A-07	ef5053e3-17c9-48b9-b5b6-d3e2e476a881	6b3487fa-abd6-4b9a-8e6e-6897b8461e46	SKCM	ef5053e3-17c9-48b9-b5b6-d3e2e476a881-140711_UNC12-SN629_0381_AC4M54ACXX_2_TAGCTT	NA	NA	NA	NA	NA	NA	NA	NA	NA	NA	NA	NA	NA	NA	NA	NA	NA	NA	NA	NA	NA	NA	NA	NA	NA	NA	NA	NA	NA	NA	NA	NA	NA	NA	NA	NA	NA	NA	NA	NA	NA	NA	NA	NA	NA
TCGA-BF-AAP7-01A-11R-A40A-07	1c2766eb-d5b1-4e10-b85e-85fa90eacb0a	03bceee5-96ca-49f6-af6b-ce54eea549c0	SKCM	1c2766eb-d5b1-4e10-b85e-85fa90eacb0a-140716_UNC13-SN749_0364_BC4V7WACXX_2_TAGCTT	NA	NA	NA	NA	NA	NA	NA	NA	NA	NA	NA	NA	NA	NA	NA	NA	NA	NA	NA	4515.7	16.9474	16.4147	92.0721	90.8772	0.863807	2.54343	12.7232	0.89195	0.208081	0.181566	19	0.877143	2.43196	11.3811	0.884454	0.208081	0.181566	16	NA	NA	NA	NA	NA	NA	NA
TCGA-BF-AAP8-01A-11R-A40A-07	a8d186c1-046e-4248-9da0-1a11a8d3f2c8	c63ade29-1f1b-4290-8c2f-8d63fa96616c	SKCM	a8d186c1-046e-4248-9da0-1a11a8d3f2c8-140716_UNC13-SN749_0364_BC4V7WACXX_4_TAGCTT	NA	NA	NA	NA	NA	NA	NA	NA	NA	NA	NA	NA	NA	NA	NA	NA	NA	NA	NA	NA	NA	NA	NA	NA	NA	NA	NA	NA	NA	NA	NA	NA	NA	NA	NA	NA	NA	NA	NA	NA	NA	NA	NA	NA	NA
TCGA-D3-A1Q1-06A-21R-A18T-07	f1b58fce-fb71-46bc-84f9-c641f4cdd2f5	ec79139b-a1a8-4c38-9db6-b8570fb49a88	SKCM	f1b58fce-fb71-46bc-84f9-c641f4cdd2f5-120124_UNC16-SN851_0123_AC0FDJACXX_1_GGCTAC	NA	NA	NA	NA	NA	NA	NA	NA	NA	NA	NA	NA	NA	NA	NA	NA	NA	NA	NA	NA	NA	NA	NA	NA	NA	NA	NA	NA	NA	NA	NA	NA	NA	NA	NA	NA	NA	NA	NA	NA	NA	NA	NA	NA	NA
TCGA-D3-A1Q3-06A-11R-A18T-07	b3af9737-a29e-4a9f-8fe8-6d1ad2a9467c	03903d4c-2420-49e3-bdb0-8e452333af62	SKCM	b3af9737-a29e-4a9f-8fe8-6d1ad2a9467c-120201_UNC11-SN627_0182_BD0MYMACXX_1_CGATGT	7360.15	20.1154	21.0791	97.3662	98.1094	0.839691	2.73579	15.422	0.907681	0.18778	0.145841	26	0.787569	2.39777	10.9986	0.846712	0.333621	0.120139	21	33342.4	18.7677	19.6877	98.9212	99.3297	0.84419	3.87916	48.3834	0.967422	0.103392	0.0636455	99	0.886294	3.58333	35.9932	0.96065	0.104394	0.0765852	57	NA	NA	NA	NA	NA	NA	NA
TCGA-D3-A1Q4-06A-11R-A18T-07	8bf74cc7-9d44-4aa6-baed-a66cb444ea21	58b46ddc-3b28-4b48-a981-27ac9ef23283	SKCM	8bf74cc7-9d44-4aa6-baed-a66cb444ea21-120201_UNC11-SN627_0182_BD0MYMACXX_2_CGATGT	5585.64	18.4375	17.773	92.8388	91.9763	0.876677	2.43067	11.3664	0.872924	0.291193	0.103252	16	0.884541	2.39538	10.9724	0.871547	0.291193	0.103252	15	26361.9	18.7969	18.3526	90.6961	91.0467	0.89865	3.73738	41.9879	0.963597	0.124016	0.0679973	64	0.90475	3.67368	39.3968	0.962391	0.124016	0.0679973	58	690.262	19	19	91.32	91.32	NA	0
TCGA-D3-A1Q5-06A-11R-A18T-07	056cf0e4-d840-406d-993a-65017a39f071	f8c4acd4-f42f-409b-a710-970611f0cc0a	SKCM	056cf0e4-d840-406d-993a-65017a39f071-120126_UNC9-SN296_0268_AD0JFTACXX_7_CGATGT	NA	NA	NA	NA	NA	NA	NA	NA	NA	NA	NA	NA	NA	NA	NA	NA	NA	NA	NA	50.2718	23	23	94.69	94.69	NA	0	1	0	1	NA	1	NA	0	1	0	1	NA	1	NA	NA	NA	NA	NA	NA	NA
TCGA-D3-A1Q6-06A-11R-A18T-07	1d72fc34-b398-4485-bcfb-c96bfbe33ebb	d4388885-339b-430e-8034-81c019b6dc43	SKCM	1d72fc34-b398-4485-bcfb-c96bfbe33ebb-120126_UNC9-SN296_0268_AD0JFTACXX_8_CGATGT	NA	NA	NA	NA	NA	NA	NA	NA	NA	NA	NA	NA	NA	NA	NA	NA	NA	NA	NA	NA	NA	NA	NA	NA	NA	NA	NA	NA	NA	NA	NA	NA	NA	NA	NA	NA	NA	NA	NA	NA	NA	NA	NA	NA	NA
TCGA-D3-A1Q7-06A-11R-A18T-07	ed38c841-70a2-4ea1-8473-9bbeaee91e31	f313d8ac-14aa-4171-b649-942458529230	SKCM	ed38c841-70a2-4ea1-8473-9bbeaee91e31-120221_UNC14-SN744_0207_AC0F2EACXX_1_TGACCA	3174.84	12.5	15.022	94.83	96.0261	0.583504	0.404454	1.49848	0.240396	0.86028	0.13972	2	0.583504	0.404454	1.49848	0.240396	0.86028	0.13972	2	224169	15.9348	16.7649	98.5955	98.0159	0.724203	3.56833	35.4574	0.953639	0.133646	0.0633624	138	0.768986	3.18601	24.1918	0.940322	0.134319	0.0942799	63	11024.8	15	13.0376	98.7736	99.1282	0.579936	1.39063
TCGA-D3-A1Q8-06A-11R-A18T-07	a146bb6d-21e0-4617-9ec0-36d7b7eb7a4f	18bfebc6-f546-4154-ad8d-b65706af6547	SKCM	a146bb6d-21e0-4617-9ec0-36d7b7eb7a4f-120118_UNC12-SN629_0179_AC0C6CACXX_2_GGCTAC	6966.72	19	15.3257	89.8583	90.0021	0.194521	0.348534	1.41699	0.127744	0.933423	0.0191172	6	0.194521	0.348534	1.41699	0.127744	0.933423	0.0191172	6	5260.89	17.9286	18.2342	92.4443	92.3928	0.949436	3.16371	23.6583	0.951195	0.107121	0.0767843	28	0.941465	2.91011	18.3588	0.933436	0.15106	0.107121	22	1221.77	10	10	84.15	84.15	NA	0
TCGA-D3-A1Q9-06A-11R-A18T-07	498520b6-4c41-479c-8536-d38e70023d79	83e1f144-8970-4d50-961d-51493ba417f3	SKCM	498520b6-4c41-479c-8536-d38e70023d79-120118_UNC12-SN629_0179_AC0C6CACXX_3_GGCTAC	213.55	19	19	82.19	82.19	NA	0	1	0	1	NA	1	NA	0	1	0	1	NA	1	73926.3	16.9091	21.7163	97.6661	98.0523	0.409109	1.54815	4.70274	0.603778	0.584048	0.229866	44	0.397752	1.40262	4.06583	0.570884	0.611901	0.229866	34	NA	NA	NA	NA	NA	NA	NA
TCGA-D3-A1QA-06A-11R-A18T-07	61621702-5d8d-4c25-9600-95b2c974ad7d	194ed685-060c-4577-99b9-86238e24c17c	SKCM	61621702-5d8d-4c25-9600-95b2c974ad7d-120124_UNC16-SN851_0123_AC0FDJACXX_2_GGCTAC	6104.23	16.5	16.9577	96	92.7408	0.252523	0.175036	1.19129	0.0809332	0.957748	0.0422518	2	0.252523	0.175036	1.19129	0.0809332	0.957748	0.0422518	2	14070.6	16.8	17.059	98.2862	98.5483	0.817475	3.01557	20.4007	0.923642	0.180431	0.142721	40	0.859872	2.69612	14.8221	0.90249	0.21973	0.142721	23	NA	NA	NA	NA	NA	NA	NA
TCGA-D3-A1QA-07A-11R-A37K-07	1ca0fe14-ceac-490d-9d1d-5bec1f98ae37	278783a2-646d-4669-b153-c0ba3deab9cf	SKCM	1ca0fe14-ceac-490d-9d1d-5bec1f98ae37-140424_UNC13-SN749_0344_AC3WUKACXX_7_ACTTGA	109.859	21	21	92.02	92.02	NA	0	1	0	1	NA	1	NA	0	1	0	1	NA	1	9551.64	18.5143	18.5604	96.4283	95.1776	0.847088	3.01169	20.3218	0.92502	0.158911	0.13281	35	0.862461	2.8739	17.7059	0.917946	0.158911	0.14881	28	NA	NA	NA	NA	NA	NA	NA
TCGA-D3-A1QB-06A-11R-A18T-07	d99a267d-a338-4dff-bc0b-e35cf1e6ebf6	36ef1cbb-f448-464b-9727-4d3f2f63d76c	SKCM	d99a267d-a338-4dff-bc0b-e35cf1e6ebf6-120201_UNC11-SN627_0182_BD0MYMACXX_1_TGACCA	10028.7	17.75	15.5344	94.0225	94.639	0.352685	0.733388	2.08212	0.286846	0.842098	0.036421	8	0.352685	0.733388	2.08212	0.286846	0.842098	0.036421	8	70066.9	16.6818	15.5943	96.5639	97.7586	0.511157	2.40268	11.0528	0.690759	0.547738	0.0612953	110	0.502876	2.02425	7.57044	0.633058	0.59695	0.067607	56	1346.25	19.4167	19.6617	98.0683	97.6977	0.903564	2.24527
TCGA-D3-A2J6-06A-11R-A18T-07	6a70da2d-2195-449d-9897-e0285f679fb1	ebd47503-5ea0-4c00-bd06-9b011fc5efb5	SKCM	6a70da2d-2195-449d-9897-e0285f679fb1-120118_UNC15-SN850_0163_AD0J87ACXX_7_ACTTGA	NA	NA	NA	NA	NA	NA	NA	NA	NA	NA	NA	NA	NA	NA	NA	NA	NA	NA	NA	NA	NA	NA	NA	NA	NA	NA	NA	NA	NA	NA	NA	NA	NA	NA	NA	NA	NA	NA	NA	NA	NA	NA	NA	NA	NA
TCGA-D3-A2J7-06A-11R-A18T-07	262f045a-8964-4b67-a7c2-f71e35550a44	53542d3e-e875-46b5-9ace-a736f2ad1ac8	SKCM	262f045a-8964-4b67-a7c2-f71e35550a44-120126_UNC9-SN296_0268_AD0JFTACXX_7_ACTTGA	612.668	16.5	16.9335	84.535	83.2995	0.352756	0.244512	1.277	0.12417	0.933492	0.0665083	2	0.352756	0.244512	1.277	0.12417	0.933492	0.0665083	2	6210.34	16.4783	15.4353	93.623	94.6267	0.859891	3.29221	26.9023	0.940388	0.167027	0.104681	46	0.872419	2.96727	19.4387	0.922239	0.198884	0.104681	30	1023.05	18.6667	18.6074	93.4633	93.5693	0.993137	1.09107
TCGA-D3-A2J8-06A-11R-A18T-07	aaae3748-9845-469d-960a-d93cc9ab9464	3c8801a6-e38d-43bd-a9d4-7bc5186f0617	SKCM	aaae3748-9845-469d-960a-d93cc9ab9464-120124_UNC16-SN851_0123_AC0FDJACXX_1_CTTGTA	7103.54	17.0909	17.3325	92.5509	93.471	0.737506	1.76846	5.86184	0.763864	0.342486	0.316679	11	0.737506	1.76846	5.86184	0.763864	0.342486	0.316679	11	33157.4	17.2162	17.2347	97.1092	96.9723	0.791109	3.40498	30.1138	0.941489	0.138563	0.127477	74	0.821422	3.14493	23.2181	0.930012	0.148278	0.1456	46	NA	NA	NA	NA	NA	NA	NA
TCGA-D3-A2J9-06A-11R-A18T-07	e809c060-c732-4104-b03e-009ecb92abe1	f109e380-99e8-42f3-a0c3-d3f459f71ae8	SKCM	e809c060-c732-4104-b03e-009ecb92abe1-120201_UNC11-SN627_0182_BD0MYMACXX_2_GATCAG	53222	18.0417	18.8557	91.2775	93.3833	0.635676	2.02021	7.53994	0.79401	0.343301	0.216428	24	0.593146	1.80585	6.08512	0.74597	0.410508	0.219729	21	258560	17.9333	18.084	92.1444	92.3978	0.703353	3.52425	33.9282	0.924823	0.215538	0.115561	150	0.720976	3.30565	27.2663	0.913932	0.234948	0.118256	98	340.656	18	18.1813	93.965	94.5625	0.976151	0.676616
TCGA-D3-A2JA-06A-11R-A18T-07	37bfc72b-a4c8-491b-8eab-26eeefee534a	eea5dc11-94fe-4ebf-b352-f70c2d358236	SKCM	37bfc72b-a4c8-491b-8eab-26eeefee534a-120201_UNC11-SN627_0182_BD0MYMACXX_3_GATCAG	NA	NA	NA	NA	NA	NA	NA	NA	NA	NA	NA	NA	NA	NA	NA	NA	NA	NA	NA	114.034	16	16	88.6	88.6	NA	0	1	0	1	NA	1	NA	0	1	0	1	NA	1	NA	NA	NA	NA	NA	NA	NA
TCGA-D3-A2JB-06A-11R-A18T-07	42cfa316-5fd6-452a-9421-a581a50ee3c3	275c0be2-e74b-4926-8490-cc5ad687b240	SKCM	42cfa316-5fd6-452a-9421-a581a50ee3c3-120221_UNC14-SN744_0207_AC0F2EACXX_2_ATCACG	4471.41	16.4286	17.1025	92.075	91.9288	0.930892	2.45668	11.666	0.902235	0.170628	0.138425	14	0.930892	2.45668	11.666	0.902235	0.170628	0.138425	14	75319	17.2604	17.3788	91.7407	93.4664	0.818038	3.73381	41.8382	0.955832	0.14823	0.07461	96	0.819398	3.49283	32.8789	0.94083	0.184011	0.0822988	71	NA	NA	NA	NA	NA	NA	NA
TCGA-D3-A2JC-06A-11R-A18T-07	c201f270-136c-4cdd-ac47-b20a7ee5143d	898969f3-0879-46c7-b641-3c0c53d62422	SKCM	c201f270-136c-4cdd-ac47-b20a7ee5143d-120126_UNC9-SN296_0268_AD0JFTACXX_8_GATCAG	NA	NA	NA	NA	NA	NA	NA	NA	NA	NA	NA	NA	NA	NA	NA	NA	NA	NA	NA	6153.59	16.04	16.3483	95.4736	95.0475	0.888624	2.86037	17.468	0.920013	0.210037	0.0667648	25	0.903463	2.8328	16.993	0.919386	0.210037	0.0667648	23	188.014	11	11	97.53	97.53	NA	0
TCGA-D3-A2JD-06A-11R-A18T-07	d8cb6bdf-b604-4653-b5ce-de6888e30b7b	fa5354d8-ce4c-4b8d-b7cc-e4708e6eae5f	SKCM	d8cb6bdf-b604-4653-b5ce-de6888e30b7b-120221_UNC14-SN744_0207_AC0F2EACXX_2_GGCTAC	318.938	22	23.0384	94.6867	95.4309	0.93699	1.02939	2.79935	0.625017	0.445517	0.383947	3	0.93699	1.02939	2.79935	0.625017	0.445517	0.383947	3	13819.5	17.2955	18.4033	95.3232	96.5466	0.894537	3.3851	29.5209	0.953417	0.109338	0.0963923	44	0.897063	3.26314	26.1316	0.948689	0.109338	0.102608	38	597.114	19	18.5232	100	100	0.683872	0.751311
TCGA-D3-A2JE-06A-11R-A37K-07	4b77ade4-dc95-4ac0-bbb3-0923e9cf625c	f73824ee-cfc9-47fe-bae2-7a2de48c51bc	SKCM	4b77ade4-dc95-4ac0-bbb3-0923e9cf625c-140416_UNC11-SN627_0353_BC42B0ACXX_7_ATCACG	143.698	24	24	96.08	96.08	NA	0	1	0	1	NA	1	NA	0	1	0	1	NA	1	NA	NA	NA	NA	NA	NA	NA	NA	NA	NA	NA	NA	NA	NA	NA	NA	NA	NA	NA	NA	NA	NA	NA	NA	NA	NA
TCGA-D3-A2JF-06A-11R-A18S-07	f940916e-87b0-494e-917b-909eeac96a62	4837761d-62c2-42b1-aea5-22caca405637	SKCM	f940916e-87b0-494e-917b-909eeac96a62-120127_UNC12-SN629_0182_BD0JFVACXX_1_GGCTAC	1922.48	17.5714	15.8704	99.4357	98.9394	0.74695	1.4535	4.27805	0.694001	0.463859	0.268496	7	0.74695	1.4535	4.27805	0.694001	0.463859	0.268496	7	37334.1	16.8571	13.695	97.3803	98.0871	0.22284	0.792275	2.20842	0.258255	0.86003	0.0349567	35	0.232592	0.696783	2.00729	0.238355	0.871517	0.0349567	20	295.297	17	17	92.225	92.1469	0.999894	0.693074
TCGA-D3-A2JG-06A-11R-A18T-07	66ec7835-7a1e-4096-a8dc-cef5c4d082c5	a4a2d2e8-d2cd-4551-942d-8cc066d332a6	SKCM	66ec7835-7a1e-4096-a8dc-cef5c4d082c5-120201_UNC11-SN627_0182_BD0MYMACXX_4_GCCAAT	496.874	16.5	16.3333	90.145	90.7604	0.829536	1.14998	3.15813	0.655977	0.437943	0.333325	4	0.829536	1.14998	3.15813	0.655977	0.437943	0.333325	4	11274.4	17	16.901	93.3576	91.884	0.794559	2.89028	17.9983	0.879143	0.306712	0.109873	38	0.802547	2.75594	15.7358	0.874142	0.309734	0.113685	31	NA	NA	NA	NA	NA	NA	NA
TCGA-D3-A2JH-06A-11R-A18T-07	5ee4ec59-176f-4ba6-b03f-64f0c70f00d0	93199f13-52a9-4c92-81a3-7be55eb10e94	SKCM	5ee4ec59-176f-4ba6-b03f-64f0c70f00d0-120127_UNC12-SN629_0182_BD0JFVACXX_1_GCCAAT	665.678	17.3333	16.558	94.65	94.1431	0.850069	0.933897	2.5444	0.560156	0.579874	0.297634	3	0.850069	0.933897	2.5444	0.560156	0.579874	0.297634	3	4325.2	18.9714	18.785	98.7026	97.2041	0.828712	2.94636	19.0365	0.91889	0.1884	0.143479	35	0.872495	2.56901	13.0529	0.890335	0.242925	0.143479	19	951.371	17.1429	17.0006	95.6029	94.5341	0.913677	1.77793
TCGA-D3-A2JK-06A-11R-A18S-07	6d3b50d4-73f2-4f4e-a4e1-db4cc5f6876b	4a74dbdf-f817-47ce-a162-415535183bf4	SKCM	6d3b50d4-73f2-4f4e-a4e1-db4cc5f6876b-120124_UNC16-SN851_0123_AC0FDJACXX_3_ACTTGA	NA	NA	NA	NA	NA	NA	NA	NA	NA	NA	NA	NA	NA	NA	NA	NA	NA	NA	NA	NA	NA	NA	NA	NA	NA	NA	NA	NA	NA	NA	NA	NA	NA	NA	NA	NA	NA	NA	NA	NA	NA	NA	NA	NA	NA
TCGA-D3-A2JL-06A-11R-A18S-07	b53ffa35-95c7-42bf-a3d2-afe3f35a48ca	1a3eaaf1-b020-4db5-abc0-dfce056649fb	SKCM	b53ffa35-95c7-42bf-a3d2-afe3f35a48ca-111122_UNC15-SN850_0148_AC05D7ACXX_2_ACTTGA	105.493	14	14	97.01	97.01	NA	0	1	0	1	NA	1	NA	0	1	0	1	NA	1	63383	16.5342	17.3901	97.3577	97.6388	0.59764	2.56415	12.9896	0.763073	0.471834	0.0833929	73	0.62	2.40014	11.0248	0.758177	0.474034	0.0838579	48	NA	NA	NA	NA	NA	NA	NA
TCGA-D3-A2JN-06A-11R-A18S-07	25032952-018a-4929-8f14-7313715ca879	68856b27-6609-4a25-b470-d11b74452374	SKCM	25032952-018a-4929-8f14-7313715ca879-111122_UNC15-SN850_0148_AC05D7ACXX_2_TAGCTT	6187.47	16.2353	15.7	91.0241	89.7223	0.82471	2.33658	10.3458	0.872116	0.253081	0.140519	17	0.795514	2.20563	9.076	0.854265	0.253081	0.18902	16	27501	18.2987	17.6349	90.6191	90.1696	0.850627	3.69496	40.2439	0.957162	0.116011	0.111398	77	0.864416	3.5535	34.9355	0.953031	0.116686	0.111398	61	NA	NA	NA	NA	NA	NA	NA
TCGA-D3-A2JO-06A-11R-A18S-07	68b032e1-c38f-4364-85d4-97be264b6483	8105c994-1a91-4514-a22e-64a2bdc5fec2	SKCM	68b032e1-c38f-4364-85d4-97be264b6483-120118_UNC12-SN629_0179_AC0C6CACXX_2_ATCACG	NA	NA	NA	NA	NA	NA	NA	NA	NA	NA	NA	NA	NA	NA	NA	NA	NA	NA	NA	188334	16.883	16.6355	97.9793	98.0451	0.701906	3.67549	39.4679	0.947144	0.109549	0.105278	188	0.712777	3.13226	22.9257	0.917414	0.181238	0.123805	81	2754.93	20	20	97.69	97.69	NA	0
TCGA-D3-A2JP-06A-11R-A18S-07	80975692-99cb-4013-9b64-147b687fe6db	b4833ecc-2007-401c-b216-94d1daa8aaad	SKCM	80975692-99cb-4013-9b64-147b687fe6db-111122_UNC15-SN850_0148_AC05D7ACXX_3_TAGCTT	NA	NA	NA	NA	NA	NA	NA	NA	NA	NA	NA	NA	NA	NA	NA	NA	NA	NA	NA	39838.5	18	19.813	96.3942	98.8676	0.186046	0.462308	1.58773	0.162182	0.91469	0.0203213	12	0.173863	0.382015	1.46523	0.134224	0.929964	0.0205777	9	NA	NA	NA	NA	NA	NA	NA
TCGA-D3-A3BZ-06A-12R-A18S-07	dec6b2a9-a610-4ace-99cc-6bcc29470a15	c572c558-9451-46c1-817b-2322f4d0d61a	SKCM	dec6b2a9-a610-4ace-99cc-6bcc29470a15-111122_UNC15-SN850_0148_AC05D7ACXX_3_GGCTAC	1221.67	17.375	17.6492	90.65	90.4042	0.969456	2.01593	7.50769	0.86032	0.198432	0.156612	8	0.969456	2.01593	7.50769	0.86032	0.198432	0.156612	8	28032.6	17.3542	17.4646	93.2458	94.5722	0.80374	3.11144	22.4533	0.922354	0.20592	0.0976664	48	0.814598	3.0447	21.0037	0.919873	0.20592	0.0976664	42	310.673	19	19	93.15	93.15	NA	0
TCGA-D3-A3C1-06A-12R-A18S-07	b4a8a6c3-5f1f-4a81-ad03-0ca491e833c3	dfdbba8f-c811-4881-81e5-3ca233071a03	SKCM	b4a8a6c3-5f1f-4a81-ad03-0ca491e833c3-120118_UNC12-SN629_0179_AC0C6CACXX_3_ATCACG	780.335	20.5	20.7172	94.165	93.6414	0.859174	0.595534	1.814	0.405607	0.717247	0.282753	2	0.859174	0.595534	1.814	0.405607	0.717247	0.282753	2	1174.62	19.6667	19.3167	94.1633	93.7917	0.638542	0.70151	2.0168	0.445201	0.683294	0.295752	3	0.638542	0.70151	2.0168	0.445201	0.683294	0.295752	3	512.012	12	12	96.25	96.25	NA	0
TCGA-D3-A3C3-06A-12R-A18S-07	d9cbfe72-0b6d-40ae-8156-81caae39747e	bb7b6ff1-29df-4d89-b11e-1b83f5dc1c41	SKCM	d9cbfe72-0b6d-40ae-8156-81caae39747e-120118_UNC12-SN629_0179_AC0C6CACXX_4_ACTTGA	NA	NA	NA	NA	NA	NA	NA	NA	NA	NA	NA	NA	NA	NA	NA	NA	NA	NA	NA	1104.55	19	18.4488	95.784	95.3959	0.947152	1.52438	4.59231	0.765931	0.337541	0.233439	5	0.947152	1.52438	4.59231	0.765931	0.337541	0.233439	5	NA	NA	NA	NA	NA	NA	NA
TCGA-D3-A3C6-06A-12R-A18U-07	3bda3a01-0706-4210-9db6-84d54e23091a	7085dbbb-eb5b-4aa9-af1f-280c9dbc98e5	SKCM	3bda3a01-0706-4210-9db6-84d54e23091a-120220_UNC9-SN296_0273_BD0MN6ACXX_2_TTAGGC	NA	NA	NA	NA	NA	NA	NA	NA	NA	NA	NA	NA	NA	NA	NA	NA	NA	NA	NA	NA	NA	NA	NA	NA	NA	NA	NA	NA	NA	NA	NA	NA	NA	NA	NA	NA	NA	NA	NA	NA	NA	NA	NA	NA	NA
TCGA-D3-A3C7-06A-11R-A18U-07	ae6dfa43-83fd-428c-8c31-e6b10efd415a	75838292-c5fe-45f1-8fa5-94403cfc3bdf	SKCM	ae6dfa43-83fd-428c-8c31-e6b10efd415a-120220_UNC9-SN296_0273_BD0MN6ACXX_3_CAGATC	NA	NA	NA	NA	NA	NA	NA	NA	NA	NA	NA	NA	NA	NA	NA	NA	NA	NA	NA	12768	18.2857	17.7369	95.8114	94.8563	0.524217	1.02008	2.77341	0.556669	0.561321	0.355679	7	0.524217	1.02008	2.77341	0.556669	0.561321	0.355679	7	NA	NA	NA	NA	NA	NA	NA
TCGA-D3-A3C8-06A-12R-A18S-07	b30a6953-e433-42ba-8472-cc56a4de7712	a43aa841-8bb9-467b-8e51-76c30d5856df	SKCM	b30a6953-e433-42ba-8472-cc56a4de7712-111122_UNC15-SN850_0148_AC05D7ACXX_4_GATCAG	NA	NA	NA	NA	NA	NA	NA	NA	NA	NA	NA	NA	NA	NA	NA	NA	NA	NA	NA	3273.88	16.4545	17.2242	93.85	94.2124	0.832492	1.99623	7.36123	0.810679	0.366058	0.130201	11	0.832492	1.99623	7.36123	0.810679	0.366058	0.130201	11	NA	NA	NA	NA	NA	NA	NA
TCGA-D3-A3CB-06A-11R-A18S-07	4e0f10d1-dd69-49ca-a2d1-595bdf791044	3628e70e-e657-4c7c-a2ba-e3781a3b2c96	SKCM	4e0f10d1-dd69-49ca-a2d1-595bdf791044-120109_UNC11-SN627_0176_AC0CKDACXX_1_GGCTAC	28460	17.449	18.1767	92.9402	94.3449	0.76345	2.97121	19.5156	0.903946	0.226022	0.140668	49	0.768823	2.85508	17.3758	0.896269	0.228781	0.162277	41	131358	17.2701	15.524	93.4434	96.4603	0.70419	3.4646	31.9637	0.928038	0.163808	0.163808	137	0.683584	3.11296	22.4874	0.872535	0.328214	0.0879127	95	1950.15	15.3333	15.5771	94.0917	94.5747	0.850787	1.5244
TCGA-D3-A3CC-06A-11R-A18S-07	98da08ba-a81d-4f61-b12c-1adc174ff10c	d21a874e-36ef-4f5c-800a-6c682a3d4831	SKCM	98da08ba-a81d-4f61-b12c-1adc174ff10c-111122_UNC15-SN850_0148_AC05D7ACXX_4_ATCACG	224.509	14	14	92.31	92.31	NA	0	1	0	1	NA	1	NA	0	1	0	1	NA	1	24007.5	17.8529	19.3771	90.6835	91.0752	0.862176	3.04034	20.9124	0.938551	0.12581	0.101537	34	0.846761	2.75883	15.7814	0.912455	0.158476	0.152494	26	1036.48	21	21	94.37	94.37	NA	0
TCGA-D3-A3CE-06A-11R-A18S-07	386d20c4-5bcc-4aec-b385-c4f06a4d1879	6a0f60ed-8539-4963-84a9-4796ca46f505	SKCM	386d20c4-5bcc-4aec-b385-c4f06a4d1879-111122_UNC15-SN850_0148_AC05D7ACXX_5_ACTTGA	739.601	17	17	87.78	87.9826	0.239782	0.166204	1.18081	0.0757944	0.960546	0.0394538	2	NA	0	1	0	1	NA	1	559712	18.5495	18.2164	90.0359	90.0915	0.619165	3.65131	38.5251	0.945179	0.105784	0.105784	364	0.581059	2.62743	13.8381	0.851077	0.276299	0.215715	92	212.838	12	12	88.33	88.33	NA	0
TCGA-D3-A3CF-06A-11R-A18T-07	be2aa1a5-c6d6-4faf-8c50-385762a2b22b	cde6162b-199e-42f0-a0fb-547bed209e8b	SKCM	be2aa1a5-c6d6-4faf-8c50-385762a2b22b-120221_UNC14-SN744_0207_AC0F2EACXX_3_TTAGGC	14979.9	18.0952	21.3095	94.7643	92.0486	0.568187	1.72986	5.63986	0.689295	0.517772	0.153545	21	0.577211	1.69956	5.47155	0.688667	0.517772	0.153545	19	47684.4	16.902	16.4576	97.1793	95.8344	0.901092	4.79212	120.556	0.987008	0.0471087	0.0374959	204	0.897193	4.21724	67.8458	0.977528	0.056213	0.0500964	110	NA	NA	NA	NA	NA	NA	NA
TCGA-D3-A3ML-06A-11R-A21D-07	338dc443-6c5c-474b-b133-439f238422e2	558ff190-9821-4d09-a9cd-dcc5f3e11b49	SKCM	338dc443-6c5c-474b-b133-439f238422e2-120402_UNC16-SN851_0143_AC0MAHACXX_8_CTTGTA	137.084	15	15	89.61	89.61	NA	0	1	0	1	NA	1	NA	0	1	0	1	NA	1	272.851	16	16	85.53	85.53	NA	0	1	0	1	NA	1	NA	0	1	0	1	NA	1	NA	NA	NA	NA	NA	NA	NA
TCGA-D3-A3MO-06A-11R-A21D-07	5dc18278-81ec-4c00-928f-f704eff9d4cd	7eb0de2d-f2b7-4bbd-bfdf-38f9205dfcd9	SKCM	5dc18278-81ec-4c00-928f-f704eff9d4cd-120402_UNC16-SN851_0143_AC0MAHACXX_8_TAGCTT	NA	NA	NA	NA	NA	NA	NA	NA	NA	NA	NA	NA	NA	NA	NA	NA	NA	NA	NA	NA	NA	NA	NA	NA	NA	NA	NA	NA	NA	NA	NA	NA	NA	NA	NA	NA	NA	NA	NA	NA	NA	NA	NA	NA	NA
TCGA-D3-A3MR-06A-11R-A21D-07	59fa541d-515b-41e8-8686-265d5e771004	74eca830-636b-4549-8887-f2d73312ef21	SKCM	59fa541d-515b-41e8-8686-265d5e771004-120405_UNC10-SN254_0345_AD0VAVACXX_1_GCCAAT	2485.17	17.875	20.0519	91.7638	91.7727	0.876495	1.82262	6.18805	0.809259	0.247595	0.247171	8	0.876495	1.82262	6.18805	0.809259	0.247595	0.247171	8	108803	17.3529	18.1529	93.9521	95.6645	0.737146	3.27488	26.4401	0.933484	0.147062	0.123454	85	0.752136	3.05401	21.2001	0.923725	0.162373	0.124745	58	6980.83	17	17.433	94.5389	94.3545	0.583202	1.28143
TCGA-D3-A3MU-06A-11R-A21D-07	b638b53a-1139-46b6-bd24-4c1c648ae648	a6e57220-d8bc-46d6-afa7-51a5756351ab	SKCM	b638b53a-1139-46b6-bd24-4c1c648ae648-120405_UNC10-SN254_0345_AD0VAVACXX_1_TGACCA	117.891	18	18	100	100	NA	0	1	0	1	NA	1	NA	0	1	0	1	NA	1	14584.7	18.4259	17.7808	96.0013	96.3114	0.884457	3.52808	34.0586	0.95766	0.127318	0.0656213	54	0.891977	3.26781	26.2539	0.946634	0.132491	0.0901128	39	NA	NA	NA	NA	NA	NA	NA
TCGA-D3-A3MV-06A-11R-A21D-07	df8269f5-74ad-4997-818d-1e6c5e22068d	dbb086b3-17fe-4bc6-9fa7-b3b26a2263ee	SKCM	df8269f5-74ad-4997-818d-1e6c5e22068d-120405_UNC10-SN254_0345_AD0VAVACXX_2_CTTGTA	NA	NA	NA	NA	NA	NA	NA	NA	NA	NA	NA	NA	NA	NA	NA	NA	NA	NA	NA	NA	NA	NA	NA	NA	NA	NA	NA	NA	NA	NA	NA	NA	NA	NA	NA	NA	NA	NA	NA	NA	NA	NA	NA	NA	NA
TCGA-D3-A51E-06A-11R-A266-07	f115c175-f220-49e1-9044-ceea895751de	0770ad2b-1ae6-40bc-9b15-6b5509b8cd84	SKCM	f115c175-f220-49e1-9044-ceea895751de-130405_UNC9-SN296_0354_AC24DCACXX_4_TAGCTT	121.896	21	21	96.005	95.7908	0.261309	0.181125	1.19857	0.0845259	0.955782	0.0442182	2	NA	0	1	0	1	NA	1	26812.8	16.4255	17.5191	96.3889	96.134	0.637313	2.45375	11.6319	0.83041	0.35373	0.1543	47	0.702993	2.31695	10.1447	0.825491	0.356658	0.1543	27	14807.9	17.9048	19.5664	97.4348	96.6506	0.780053	2.37489
TCGA-D3-A51F-06A-11R-A266-07	a8022c01-9664-4d1a-b33b-e5bb3c18ff4f	8b886e63-05aa-461c-ae8a-2f82271f3bf6	SKCM	a8022c01-9664-4d1a-b33b-e5bb3c18ff4f-130423_UNC11-SN627_0293_AC23BAACXX_1_GTGGCC	1891.67	14.75	17.2016	87.59	91.5444	0.723258	1.00265	2.72549	0.591795	0.447444	0.446945	4	0.723258	1.00265	2.72549	0.591795	0.447444	0.446945	4	31641.3	18.1139	16.2664	95.0495	87.9174	0.668341	2.92028	18.5465	0.873627	0.306229	0.118277	79	0.669896	2.4368	11.4364	0.797779	0.419622	0.119249	38	156.639	10	10	86.59	86.59	NA	0
TCGA-D3-A51G-06A-11R-A266-07	04deba85-36c6-4bd5-80b6-1567bcbc72bf	05e46b8a-14f5-4315-9418-25bc9de5c436	SKCM	04deba85-36c6-4bd5-80b6-1567bcbc72bf-130423_UNC11-SN627_0293_AC23BAACXX_2_ACTTGA	NA	NA	NA	NA	NA	NA	NA	NA	NA	NA	NA	NA	NA	NA	NA	NA	NA	NA	NA	NA	NA	NA	NA	NA	NA	NA	NA	NA	NA	NA	NA	NA	NA	NA	NA	NA	NA	NA	NA	NA	NA	NA	NA	NA	NA
TCGA-D3-A51H-06A-12R-A266-07	b3c5f707-4093-467f-bb5f-a25ad07be0c8	2e36ce5c-b206-49d8-a5b9-3280c8054550	SKCM	b3c5f707-4093-467f-bb5f-a25ad07be0c8-130405_UNC9-SN296_0354_AC24DCACXX_3_TAGCTT	NA	NA	NA	NA	NA	NA	NA	NA	NA	NA	NA	NA	NA	NA	NA	NA	NA	NA	NA	766.809	18.4286	18.2751	97.4657	97.3737	0.97806	1.90322	6.70743	0.84502	0.199028	0.196739	7	0.962856	1.72521	5.61368	0.809739	0.286403	0.199028	6	NA	NA	NA	NA	NA	NA	NA
TCGA-D3-A51J-06A-11R-A266-07	3d108af1-795c-4158-8fb7-2917c936abf3	248f1608-e917-430a-9ac0-130c5bed3a29	SKCM	3d108af1-795c-4158-8fb7-2917c936abf3-130405_UNC9-SN296_0354_AC24DCACXX_3_ATCACG	150.712	21	21	92.49	92.49	NA	0	1	0	1	NA	1	NA	0	1	0	1	NA	1	34825	15.9851	16.8953	97.7745	95.969	0.639422	2.68857	14.7107	0.839872	0.315194	0.227969	67	0.661094	2.40479	11.0761	0.824778	0.31785	0.248056	38	NA	NA	NA	NA	NA	NA	NA
TCGA-D3-A51K-06A-11R-A266-07	d97f2bd7-7802-457e-95f0-9a2cfef00e93	1cbf47c5-0030-42fd-801c-2188a84008b4	SKCM	d97f2bd7-7802-457e-95f0-9a2cfef00e93-130405_UNC9-SN296_0354_AC24DCACXX_3_GATCAG	NA	NA	NA	NA	NA	NA	NA	NA	NA	NA	NA	NA	NA	NA	NA	NA	NA	NA	NA	6352.19	18.6154	18.91	99.1908	98.9456	0.917435	3.36108	28.8203	0.957066	0.0859769	0.0777061	39	0.943689	2.99909	20.0673	0.939941	0.142221	0.0890689	24	1007.01	19	19	98.17	98.17	NA	0
TCGA-D3-A51N-06A-11R-A266-07	fa866a27-fd69-473f-8628-25001fe996b0	9b1452ff-77d5-4ab0-8cb4-bc568396b0f1	SKCM	fa866a27-fd69-473f-8628-25001fe996b0-130405_UNC9-SN296_0354_AC24DCACXX_4_GTGGCC	NA	NA	NA	NA	NA	NA	NA	NA	NA	NA	NA	NA	NA	NA	NA	NA	NA	NA	NA	1159.88	16.75	16.4808	92.6863	93.2144	0.938094	1.95071	7.03369	0.841217	0.238629	0.216229	8	0.938094	1.95071	7.03369	0.841217	0.238629	0.216229	8	NA	NA	NA	NA	NA	NA	NA
TCGA-D3-A51R-06A-11R-A266-07	d3c9a906-169a-4220-893b-fc323ca9b817	a1dbd4f4-b4a6-454c-b68d-06297e48323e	SKCM	d3c9a906-169a-4220-893b-fc323ca9b817-130405_UNC9-SN296_0354_AC24DCACXX_4_TTAGGC	NA	NA	NA	NA	NA	NA	NA	NA	NA	NA	NA	NA	NA	NA	NA	NA	NA	NA	NA	NA	NA	NA	NA	NA	NA	NA	NA	NA	NA	NA	NA	NA	NA	NA	NA	NA	NA	NA	NA	NA	NA	NA	NA	NA	NA
TCGA-D3-A51T-06A-11R-A266-07	b2823c86-4ba5-49db-a91e-41e20fe49e95	279e2d3b-f060-4afa-a26e-673a4af821d4	SKCM	b2823c86-4ba5-49db-a91e-41e20fe49e95-130405_UNC9-SN296_0354_AC24DCACXX_5_GGCTAC	NA	NA	NA	NA	NA	NA	NA	NA	NA	NA	NA	NA	NA	NA	NA	NA	NA	NA	NA	1686.89	18.25	18.2778	98.6925	98.3897	0.891008	2.4704	11.8272	0.88298	0.268197	0.102214	16	0.9254	2.29953	9.96951	0.874693	0.268197	0.102214	12	NA	NA	NA	NA	NA	NA	NA
TCGA-D3-A5GL-06A-11R-A27Q-07	b49732cc-d492-41e7-9e22-39b441a1bb70	12751dec-ada5-46b2-a86e-090c82a830cb	SKCM	b49732cc-d492-41e7-9e22-39b441a1bb70-130412_UNC10-SN254_0451_AC22EDACXX_6_GTGGCC	NA	NA	NA	NA	NA	NA	NA	NA	NA	NA	NA	NA	NA	NA	NA	NA	NA	NA	NA	NA	NA	NA	NA	NA	NA	NA	NA	NA	NA	NA	NA	NA	NA	NA	NA	NA	NA	NA	NA	NA	NA	NA	NA	NA	NA
TCGA-D3-A5GN-06A-11R-A27Q-07	491cc750-a1aa-4d87-8af5-10c4b4293487	73a8105e-c356-4a7e-888c-feb5339074fb	SKCM	491cc750-a1aa-4d87-8af5-10c4b4293487-130412_UNC10-SN254_0451_AC22EDACXX_7_ATCACG	NA	NA	NA	NA	NA	NA	NA	NA	NA	NA	NA	NA	NA	NA	NA	NA	NA	NA	NA	11608.5	17.2667	18.4182	98.068	98.2324	0.697337	2.37178	10.7165	0.867615	0.223049	0.182067	30	0.791476	2.19444	8.97494	0.854402	0.248085	0.183505	16	NA	NA	NA	NA	NA	NA	NA
TCGA-D3-A5GO-06A-12R-A27Q-07	fb37c602-b647-4d7f-95cb-9e2b8dcd3165	1d1a1d5e-fdfe-4251-93ec-c89b65bb341e	SKCM	fb37c602-b647-4d7f-95cb-9e2b8dcd3165-130412_UNC10-SN254_0451_AC22EDACXX_7_ACTTGA	NA	NA	NA	NA	NA	NA	NA	NA	NA	NA	NA	NA	NA	NA	NA	NA	NA	NA	NA	116.173	14	14	85.78	85.78	NA	0	1	0	1	NA	1	NA	0	1	0	1	NA	1	NA	NA	NA	NA	NA	NA	NA
TCGA-D3-A5GR-06A-11R-A27Q-07	9ccdd1cf-918e-41d8-8e1e-7f96de4a854f	4f8a1027-ed36-4171-8d23-c6a4b089fe5e	SKCM	9ccdd1cf-918e-41d8-8e1e-7f96de4a854f-130412_UNC10-SN254_0451_AC22EDACXX_7_TTAGGC	4269.97	17.1852	17.5867	90.0574	90.1198	0.962746	3.17305	23.8803	0.953712	0.0777629	0.0650376	27	0.962746	3.17305	23.8803	0.953712	0.0777629	0.0650376	27	17025.9	17.8023	17.3061	90.3043	90.9908	0.927374	4.13085	62.2305	0.977559	0.0754697	0.0450226	86	0.933294	4.06609	58.3283	0.976716	0.0768763	0.0450226	78	76.7495	18	18	90.09	90.09	NA	0
TCGA-D3-A5GS-06A-11R-A27Q-07	067e34f9-62b8-4268-a217-c943d3135fce	fe14ca77-d5f6-4951-be78-6e65efdfc8aa	SKCM	067e34f9-62b8-4268-a217-c943d3135fce-130412_UNC10-SN254_0451_AC22EDACXX_8_TAGCTT	31.8006	14	14	91.03	91.03	NA	0	1	0	1	NA	1	NA	0	1	0	1	NA	1	NA	NA	NA	NA	NA	NA	NA	NA	NA	NA	NA	NA	NA	NA	NA	NA	NA	NA	NA	NA	NA	NA	NA	NA	NA	NA
TCGA-D3-A5GT-01A-12R-A311-07	1e35f9e2-b040-4993-8a7f-10e585a1c6af	c170e900-9e39-4164-838a-199dcaac1463	SKCM	1e35f9e2-b040-4993-8a7f-10e585a1c6af-130718_UNC11-SN627_0315_AD2AVLACXX_5_AGTCAA	NA	NA	NA	NA	NA	NA	NA	NA	NA	NA	NA	NA	NA	NA	NA	NA	NA	NA	NA	NA	NA	NA	NA	NA	NA	NA	NA	NA	NA	NA	NA	NA	NA	NA	NA	NA	NA	NA	NA	NA	NA	NA	NA	NA	NA
TCGA-D3-A5GU-06A-11R-A27Q-07	c9a05a59-1c03-4694-a92b-010302b204d0	0a0e5ca8-09fd-495d-b8df-b7a58c426716	SKCM	c9a05a59-1c03-4694-a92b-010302b204d0-130412_UNC10-SN254_0451_AC22EDACXX_8_GTTTCG	NA	NA	NA	NA	NA	NA	NA	NA	NA	NA	NA	NA	NA	NA	NA	NA	NA	NA	NA	178.116	16	16	92.545	91.9709	0.95008	0.658545	1.93198	0.465799	0.630769	0.369231	2	0.95008	0.658545	1.93198	0.465799	0.630769	0.369231	2	NA	NA	NA	NA	NA	NA	NA
TCGA-D3-A8GB-06A-11R-A37K-07	4726a0f4-1c9e-4978-a4b1-47f822a4df71	7c990bc0-5ce0-452a-afc5-0b42f3bbddbd	SKCM	4726a0f4-1c9e-4978-a4b1-47f822a4df71-140416_UNC11-SN627_0353_BC42B0ACXX_7_TAGCTT	3769.6	20.1667	22.0127	91.5117	91.4186	0.771995	1.38323	3.98776	0.681655	0.491718	0.189182	6	0.771995	1.38323	3.98776	0.681655	0.491718	0.189182	6	16467.8	17.8953	17.5169	96.8563	94.9713	0.878142	3.91155	49.9764	0.968295	0.108664	0.0567411	86	0.913659	3.43646	31.0766	0.957308	0.108664	0.0774233	43	NA	NA	NA	NA	NA	NA	NA
TCGA-D3-A8GC-06A-11R-A37K-07	9502acd6-b3c3-47a7-b95b-8e0f8e8b1e51	95d95f15-e6ac-4359-be92-94e2b93da795	SKCM	9502acd6-b3c3-47a7-b95b-8e0f8e8b1e51-140416_UNC11-SN627_0353_BC42B0ACXX_8_CGATGT	NA	NA	NA	NA	NA	NA	NA	NA	NA	NA	NA	NA	NA	NA	NA	NA	NA	NA	NA	59202.5	16.9655	16.6451	93.984	94.5059	0.727178	2.95266	19.1569	0.908708	0.207721	0.113279	58	0.742255	2.85779	17.423	0.905603	0.207893	0.113279	47	NA	NA	NA	NA	NA	NA	NA
TCGA-D3-A8GD-06A-11R-A37K-07	e8967855-1a73-4bf0-9751-5f24d5118173	c8a18d2b-fc77-44e6-8f1f-1064cb5a91a2	SKCM	e8967855-1a73-4bf0-9751-5f24d5118173-140416_UNC11-SN627_0353_BC42B0ACXX_8_GGCTAC	NA	NA	NA	NA	NA	NA	NA	NA	NA	NA	NA	NA	NA	NA	NA	NA	NA	NA	NA	34116.7	16.3077	14.4984	98.1617	99.0067	0.563661	2.35294	10.5164	0.698782	0.541411	0.0442634	65	0.541793	1.99861	7.37879	0.66895	0.556928	0.126407	40	NA	NA	NA	NA	NA	NA	NA
TCGA-D3-A8GE-06A-11R-A37K-07	4f105c60-d89a-4859-879d-430ef9d4cd32	38341bc7-a1b6-4599-adba-03163cf0a5c0	SKCM	4f105c60-d89a-4859-879d-430ef9d4cd32-140424_UNC13-SN749_0344_AC3WUKACXX_7_ATCACG	NA	NA	NA	NA	NA	NA	NA	NA	NA	NA	NA	NA	NA	NA	NA	NA	NA	NA	NA	120.916	14	14	91.88	91.88	NA	0	1	0	1	NA	1	NA	0	1	0	1	NA	1	NA	NA	NA	NA	NA	NA	NA
TCGA-D3-A8GI-06A-11R-A37K-07	037278c6-6fff-46e3-9967-d1b97bd68c43	d98bb16b-e009-4fb3-8cf5-33da33bc652e	SKCM	037278c6-6fff-46e3-9967-d1b97bd68c43-140424_UNC13-SN749_0344_AC3WUKACXX_8_GATCAG	NA	NA	NA	NA	NA	NA	NA	NA	NA	NA	NA	NA	NA	NA	NA	NA	NA	NA	NA	NA	NA	NA	NA	NA	NA	NA	NA	NA	NA	NA	NA	NA	NA	NA	NA	NA	NA	NA	NA	NA	NA	NA	NA	NA	NA
TCGA-D3-A8GJ-06A-11R-A37K-07	10a6af1b-9b93-4192-b58d-88e8a49ee605	ab5436ab-e50b-4be6-aec5-6ad0236dd63e	SKCM	10a6af1b-9b93-4192-b58d-88e8a49ee605-140424_UNC13-SN749_0344_AC3WUKACXX_8_CGATGT	745.557	17.5	17.5036	97.2175	96.5599	0.819848	1.13655	3.116	0.630687	0.48939	0.338783	4	0.794124	0.872434	2.39273	0.535151	0.586998	0.338783	3	36295.7	16.2024	16.6431	91.4268	92.5312	0.79116	3.50549	33.2976	0.938489	0.154166	0.133984	84	0.793799	3.33768	28.1538	0.930653	0.171623	0.133984	67	26132.1	16	16	98.64	98.9976	0.293882	0.407407
TCGA-D3-A8GK-06A-11R-A37K-07	eb1e7247-5dda-4db4-8e0e-2d34f6775855	42017e68-f474-4c5c-8849-9d85534f73cf	SKCM	eb1e7247-5dda-4db4-8e0e-2d34f6775855-140424_UNC12-SN629_0365_AC4368ACXX_1_CTTGTA	NA	NA	NA	NA	NA	NA	NA	NA	NA	NA	NA	NA	NA	NA	NA	NA	NA	NA	NA	5518.7	17.6	16.0166	95.08	95.4563	0.439693	0.707658	2.02923	0.39593	0.7458	0.217513	5	0.490954	0.680606	1.97507	0.389351	0.75021	0.217513	4	NA	NA	NA	NA	NA	NA	NA
TCGA-D3-A8GL-06A-11R-A37K-07	d2ca0d82-a292-40f8-8ab0-e6f68137a67d	25f18340-6e6a-4d7e-a8c8-51466d436794	SKCM	d2ca0d82-a292-40f8-8ab0-e6f68137a67d-140416_UNC11-SN627_0353_BC42B0ACXX_8_TTAGGC	NA	NA	NA	NA	NA	NA	NA	NA	NA	NA	NA	NA	NA	NA	NA	NA	NA	NA	NA	NA	NA	NA	NA	NA	NA	NA	NA	NA	NA	NA	NA	NA	NA	NA	NA	NA	NA	NA	NA	NA	NA	NA	NA	NA	NA
TCGA-D3-A8GM-06A-11R-A37K-07	ff6f83b8-f658-4660-95e8-0654b68dd00c	b1b529ee-df72-4e05-b342-eb31a28eaf64	SKCM	ff6f83b8-f658-4660-95e8-0654b68dd00c-140416_UNC15-SN850_0361_AC41LKACXX_2_GTGGCC	NA	NA	NA	NA	NA	NA	NA	NA	NA	NA	NA	NA	NA	NA	NA	NA	NA	NA	NA	26782.9	18.75	18.7349	97.731	97.2808	0.761471	3.25656	25.96	0.917543	0.230206	0.102977	72	0.802195	3.05369	21.1933	0.910698	0.238277	0.102977	45	NA	NA	NA	NA	NA	NA	NA
TCGA-D3-A8GN-06A-11R-A37K-07	bb9302d4-a2ac-4b0e-9334-79e7dd7ee996	8e6e3942-0def-4129-ab8c-8346bf6283ab	SKCM	bb9302d4-a2ac-4b0e-9334-79e7dd7ee996-140416_UNC15-SN850_0361_AC41LKACXX_1_TGACCA	28.9619	19	19	94.06	94.06	NA	0	1	0	1	NA	1	NA	0	1	0	1	NA	1	336554	17.3993	17.4355	95.2924	95.531	0.703536	4.42111	83.189	0.976978	0.0523546	0.0523546	536	0.688997	2.59146	13.3492	0.879676	0.204462	0.193507	43	NA	NA	NA	NA	NA	NA	NA
TCGA-D3-A8GO-06A-11R-A37K-07	32f7fb60-bdc2-4bc3-9314-5345509fe89e	dd6114ab-b5af-4cfd-93f8-67429b2a6c94	SKCM	32f7fb60-bdc2-4bc3-9314-5345509fe89e-140416_UNC15-SN850_0361_AC41LKACXX_1_GTTTCG	13814.3	17.4857	17.6971	88.8046	89.5672	0.884206	3.14366	23.1886	0.939284	0.12993	0.108643	35	0.888343	3.13262	22.9339	0.939156	0.12993	0.108643	34	13458.3	18.359	19.2009	91.5551	88.8253	0.836324	3.06393	21.4114	0.928863	0.153776	0.126698	39	0.86561	2.99998	20.0851	0.927277	0.153776	0.130159	32	27.2819	15	15	100	100	NA	0
TCGA-D3-A8GP-06A-11R-A37K-07	f8473fd4-ba67-4497-a80e-e7efebab3f9c	15a623d2-4076-4e40-a3d9-31869b56b0e9	SKCM	f8473fd4-ba67-4497-a80e-e7efebab3f9c-140424_UNC12-SN629_0365_AC4368ACXX_2_TTAGGC	NA	NA	NA	NA	NA	NA	NA	NA	NA	NA	NA	NA	NA	NA	NA	NA	NA	NA	NA	110.192	19	19	85.84	85.84	NA	0	1	0	1	NA	1	NA	0	1	0	1	NA	1	NA	NA	NA	NA	NA	NA	NA
TCGA-D3-A8GQ-06A-11R-A37K-07	888c9ff8-f409-4a4b-8ccd-9bf7897b27de	1306850b-f5cf-457d-bf51-0caab2b7b834	SKCM	888c9ff8-f409-4a4b-8ccd-9bf7897b27de-140424_UNC12-SN629_0365_AC4368ACXX_1_AGTCAA	297.39	20	20	100	100	NA	0	1	0	1	NA	1	NA	0	1	0	1	NA	1	47555.9	18.6129	19.3799	98.5516	99.1914	0.407704	1.40005	4.0554	0.515946	0.686638	0.0846809	31	0.411373	1.05515	2.87241	0.421309	0.75336	0.0846809	13	NA	NA	NA	NA	NA	NA	NA
TCGA-D3-A8GR-06A-11R-A37K-07	434134df-00f2-40b6-b76c-2b8ad8cfc9a9	e6124a2c-05cf-4c70-9b4c-404d0a9d38b2	SKCM	434134df-00f2-40b6-b76c-2b8ad8cfc9a9-140424_UNC12-SN629_0365_AC4368ACXX_3_TGACCA	NA	NA	NA	NA	NA	NA	NA	NA	NA	NA	NA	NA	NA	NA	NA	NA	NA	NA	NA	NA	NA	NA	NA	NA	NA	NA	NA	NA	NA	NA	NA	NA	NA	NA	NA	NA	NA	NA	NA	NA	NA	NA	NA	NA	NA
TCGA-D3-A8GS-06A-12R-A37K-07	ddada03b-1fd0-46e7-be35-86caa3ae297f	cac7aecd-c473-42d4-8c88-5054f2a6865d	SKCM	ddada03b-1fd0-46e7-be35-86caa3ae297f-140424_UNC12-SN629_0365_AC4368ACXX_3_AGTTCC	944.801	15.6667	14.7785	94.7467	94.6221	0.886597	0.974026	2.64859	0.595097	0.485674	0.392732	3	0.886597	0.974026	2.64859	0.595097	0.485674	0.392732	3	41684.1	16.1507	15.9	93.27	93.86	0.761454	3.26699	26.2322	0.929347	0.168092	0.127105	73	0.768662	3.10774	22.3704	0.919244	0.168413	0.132489	57	NA	NA	NA	NA	NA	NA	NA
TCGA-D3-A8GV-06A-11R-A37K-07	eb115bc9-2223-44d9-9993-862b71e407c0	dbadd723-4f2b-4197-866e-90ac6857ad64	SKCM	eb115bc9-2223-44d9-9993-862b71e407c0-140416_UNC15-SN850_0361_AC41LKACXX_1_ACAGTG	NA	NA	NA	NA	NA	NA	NA	NA	NA	NA	NA	NA	NA	NA	NA	NA	NA	NA	NA	NA	NA	NA	NA	NA	NA	NA	NA	NA	NA	NA	NA	NA	NA	NA	NA	NA	NA	NA	NA	NA	NA	NA	NA	NA	NA
TCGA-D9-A148-06A-11R-A18S-07	37640852-435c-49b0-a9c5-190e19371658	6881e2cc-96b3-4d5b-a0b5-852b4d94bfea	SKCM	37640852-435c-49b0-a9c5-190e19371658-120118_UNC12-SN629_0179_AC0C6CACXX_4_ATCACG	167.502	14	14	85.9	85.9	NA	0	1	0	1	NA	1	NA	0	1	0	1	NA	1	8371.12	17	16.2706	92.3734	93.0367	0.92844	3.12633	22.7902	0.946744	0.122554	0.0735956	29	0.927989	2.98708	19.8277	0.939511	0.122554	0.0900633	25	NA	NA	NA	NA	NA	NA	NA
TCGA-D9-A149-06A-11R-A18S-07	09f43f3e-0d6c-440d-bc01-9394e19a6c53	fa7aa15e-c39b-47ad-b80b-b24c4532b20e	SKCM	09f43f3e-0d6c-440d-bc01-9394e19a6c53-120118_UNC12-SN629_0179_AC0C6CACXX_5_TAGCTT	4523.99	16.9	17.2099	92.925	93.178	0.895647	2.0623	7.86406	0.85605	0.200218	0.185165	10	0.895647	2.0623	7.86406	0.85605	0.200218	0.185165	10	12928.6	16.2444	16.3205	95.3924	95.0824	0.826012	3.14435	23.2046	0.939298	0.124917	0.119907	45	0.824731	2.68705	14.6883	0.888373	0.269844	0.119907	26	442.59	19	18.2593	98.7467	98.9289	0.967906	1.06335
TCGA-D9-A1JW-06A-11R-A18S-07	a1b12a23-5811-492c-aa3c-9606f98aaf5a	dd9cd802-af40-4c9b-a1f8-ff2ce09503af	SKCM	a1b12a23-5811-492c-aa3c-9606f98aaf5a-111122_UNC15-SN850_0148_AC05D7ACXX_5_ATCACG	2911.69	14.5	16.9108	88.97	92.7808	0.537313	0.962735	2.61885	0.432007	0.743628	0.0753373	6	0.54539	0.877771	2.40553	0.424467	0.743628	0.123313	5	36934.2	18.641	18.8169	92.1667	92.6928	0.882373	4.20201	66.8208	0.971534	0.127084	0.038108	117	0.90111	4.01386	55.3599	0.968181	0.131517	0.0454767	86	2378.52	17.6667	14.6064	94.4167	95.1722	0.39123	0.42981
TCGA-D9-A1JX-06A-11R-A18S-07	736828b6-9990-4740-a582-d37a28339d30	c8ab76f4-ea65-40d3-94d8-42be5477641e	SKCM	736828b6-9990-4740-a582-d37a28339d30-120118_UNC12-SN629_0179_AC0C6CACXX_5_TTAGGC	233.26	18.5	18.6301	88.48	88.6761	0.994564	0.689379	1.99248	0.496237	0.543379	0.456621	2	0.994564	0.689379	1.99248	0.496237	0.543379	0.456621	2	24517.9	17.9091	17.697	95.3621	94.7782	0.756895	2.64649	14.1045	0.875019	0.288574	0.135353	33	0.780362	2.62771	13.842	0.874508	0.288574	0.135353	29	NA	NA	NA	NA	NA	NA	NA
TCGA-D9-A1X3-06A-11R-A18S-07	8dca721d-84c0-439c-bb92-4d305e65e91f	1589f6a7-211a-458f-a2ad-72c2c175b5e5	SKCM	8dca721d-84c0-439c-bb92-4d305e65e91f-111122_UNC15-SN850_0149_BC0588ACXX_1_TTAGGC	546.379	18	17.2148	88.01	88.756	0.885752	0.613957	1.84773	0.422923	0.696312	0.303688	2	0.885752	0.613957	1.84773	0.422923	0.696312	0.303688	2	7051.96	18.3125	16.3442	89.2994	87.9062	0.867667	2.40568	11.086	0.882914	0.220672	0.149916	16	0.867667	2.40568	11.086	0.882914	0.220672	0.149916	16	NA	NA	NA	NA	NA	NA	NA
TCGA-D9-A3Z1-06A-11R-A239-07	a91d11ee-0f81-45cd-bd8a-0a9c6b0b238b	02486980-EB4F-4930-BA27-356E346929B6	SKCM	a91d11ee-0f81-45cd-bd8a-0a9c6b0b238b-120817_UNC9-SN296_0312_AC0WHCACXX_1_CGATGT	2363.39	21.2632	21.382	84.3368	85.2859	0.860397	2.53339	12.5961	0.889761	0.250215	0.11197	19	0.847645	2.03256	7.63363	0.812711	0.369153	0.151396	11	33303.8	16.9204	16.8816	98.9016	97.9702	0.820665	4.35224	77.652	0.973271	0.100087	0.0611271	201	0.845486	4.00439	54.8384	0.968191	0.100087	0.064836	114	1677.17	16.1111	16.0546	97.6539	97.1209	0.672757	1.94452
TCGA-D9-A3Z3-06A-11R-A239-07	32ad900b-87a4-4653-a810-7b818951feb3	26641854-14AE-4797-B404-F3A143892BC9	SKCM	32ad900b-87a4-4653-a810-7b818951feb3-120817_UNC9-SN296_0312_AC0WHCACXX_2_GCCAAT	3494.15	15.8	15.2569	96.574	93.1327	0.374542	0.602801	1.82723	0.277002	0.845064	0.0664107	5	0.374542	0.602801	1.82723	0.277002	0.845064	0.0664107	5	119109	17.7003	17.6766	96.9154	96.8198	0.827853	4.76753	117.628	0.977864	0.113988	0.0380615	317	0.849059	4.34548	77.1288	0.973069	0.119684	0.0454087	167	3060.68	14.3333	16.3136	99.7167	99.9654	0.514726	0.922265
TCGA-D9-A3Z4-01A-11R-A239-07	726eee25-6447-496a-b81b-4ed13d1375a3	596101F8-7371-46AB-B3C6-D54355719064	SKCM	726eee25-6447-496a-b81b-4ed13d1375a3-120817_UNC9-SN296_0312_AC0WHCACXX_2_AGTCAA	818.888	17.25	18.3013	95.6075	94.7942	0.759467	1.05284	2.86579	0.589954	0.558109	0.288134	4	0.759467	1.05284	2.86579	0.589954	0.558109	0.288134	4	13787.5	17.2286	19.2464	95.8569	95.2963	0.707654	2.51596	12.3784	0.836564	0.365843	0.10173	35	0.754656	2.45874	11.6901	0.835571	0.365843	0.10173	26	222.489	12	12	98.33	98.33	0.811278	0.562335
TCGA-D9-A4Z2-01A-11R-A24X-07	6dbc4f23-ba3a-470f-b3d4-01c7c1dcf874	fab24bb5-a75b-4840-bcc3-713a0359d797	SKCM	6dbc4f23-ba3a-470f-b3d4-01c7c1dcf874-130118_UNC12-SN629_0249_AD1MRDACXX_8_CAGATC	NA	NA	NA	NA	NA	NA	NA	NA	NA	NA	NA	NA	NA	NA	NA	NA	NA	NA	NA	NA	NA	NA	NA	NA	NA	NA	NA	NA	NA	NA	NA	NA	NA	NA	NA	NA	NA	NA	NA	NA	NA	NA	NA	NA	NA
TCGA-D9-A4Z3-01A-11R-A266-07	87c2c85d-c1a4-4a9d-a20c-ec64bb111ea2	789b2b10-3286-44ba-af24-a8f176a51ad8	SKCM	87c2c85d-c1a4-4a9d-a20c-ec64bb111ea2-130423_UNC11-SN627_0293_AC23BAACXX_2_GTTTCG	NA	NA	NA	NA	NA	NA	NA	NA	NA	NA	NA	NA	NA	NA	NA	NA	NA	NA	NA	NA	NA	NA	NA	NA	NA	NA	NA	NA	NA	NA	NA	NA	NA	NA	NA	NA	NA	NA	NA	NA	NA	NA	NA	NA	NA
TCGA-D9-A4Z5-01A-11R-A266-07	e2214d17-a0ab-48c9-ab81-77157eb4f88a	a952260d-78c3-4d99-9007-75150ac3151f	SKCM	e2214d17-a0ab-48c9-ab81-77157eb4f88a-130423_UNC11-SN627_0293_AC23BAACXX_2_GATCAG	NA	NA	NA	NA	NA	NA	NA	NA	NA	NA	NA	NA	NA	NA	NA	NA	NA	NA	NA	NA	NA	NA	NA	NA	NA	NA	NA	NA	NA	NA	NA	NA	NA	NA	NA	NA	NA	NA	NA	NA	NA	NA	NA	NA	NA
TCGA-D9-A4Z6-06A-12R-A266-07	b28c3eb9-7970-42a7-9641-9209213e9042	88d7b0f7-b9cf-49e7-b310-900e87f7cd21	SKCM	b28c3eb9-7970-42a7-9641-9209213e9042-130405_UNC9-SN296_0354_AC24DCACXX_6_GGCTAC	NA	NA	NA	NA	NA	NA	NA	NA	NA	NA	NA	NA	NA	NA	NA	NA	NA	NA	NA	NA	NA	NA	NA	NA	NA	NA	NA	NA	NA	NA	NA	NA	NA	NA	NA	NA	NA	NA	133.237	25	25	98.51	98.51	NA	0
TCGA-D9-A6E9-06A-12R-A311-07	f74c1ed3-0d40-4748-b5f7-a2c44dec264a	6f7cf94c-44f1-4ad0-816b-6100e53ea887	SKCM	f74c1ed3-0d40-4748-b5f7-a2c44dec264a-130718_UNC11-SN627_0315_AD2AVLACXX_5_TGACCA	1398.81	15.75	16.614	91.25	90.7201	0.709548	0.983642	2.67418	0.525686	0.648964	0.204016	4	0.709548	0.983642	2.67418	0.525686	0.648964	0.204016	4	49101.3	16.6364	14.5853	92.4437	94.2492	0.776281	3.47567	32.3195	0.935013	0.192974	0.0953982	88	0.77965	3.37646	29.2668	0.928917	0.206297	0.0972348	76	NA	NA	NA	NA	NA	NA	NA
TCGA-D9-A6EA-06A-11R-A311-07	26a1b80c-716f-44f1-9c9a-dd25c983c2fb	3b2af3d9-31f1-4075-8a42-2e4f371cd0a6	SKCM	26a1b80c-716f-44f1-9c9a-dd25c983c2fb-130718_UNC11-SN627_0315_AD2AVLACXX_5_CAGATC	NA	NA	NA	NA	NA	NA	NA	NA	NA	NA	NA	NA	NA	NA	NA	NA	NA	NA	NA	634.33	21.25	20.6593	98.8275	99.3101	0.945326	1.3105	3.70803	0.712169	0.38331	0.301909	4	0.945326	1.3105	3.70803	0.712169	0.38331	0.301909	4	NA	NA	NA	NA	NA	NA	NA
TCGA-D9-A6EC-06A-11R-A311-07	fbdf835d-84f7-45b6-83fe-183276649c17	6cf6c8d5-4883-40a2-9a5c-0041f8f073de	SKCM	fbdf835d-84f7-45b6-83fe-183276649c17-130718_UNC11-SN627_0315_AD2AVLACXX_6_AGTTCC	NA	NA	NA	NA	NA	NA	NA	NA	NA	NA	NA	NA	NA	NA	NA	NA	NA	NA	NA	NA	NA	NA	NA	NA	NA	NA	NA	NA	NA	NA	NA	NA	NA	NA	NA	NA	NA	NA	NA	NA	NA	NA	NA	NA	NA
TCGA-D9-A6EG-06A-12R-A32P-07	dd470b3a-88db-45d9-91d9-2f113e53430a	da7b3bf7-8f1f-4776-a314-46177f73965e	SKCM	dd470b3a-88db-45d9-91d9-2f113e53430a-131015_UNC11-SN627_0328_BC2NN6ACXX_7_CGATGT	NA	NA	NA	NA	NA	NA	NA	NA	NA	NA	NA	NA	NA	NA	NA	NA	NA	NA	NA	NA	NA	NA	NA	NA	NA	NA	NA	NA	NA	NA	NA	NA	NA	NA	NA	NA	NA	NA	NA	NA	NA	NA	NA	NA	NA
TCGA-DA-A1HV-06A-21R-A18S-07	841529b1-23bf-4adf-918a-021e8c1876a9	11e4b666-d6e8-4b8d-9340-5ac8ac3979e6	SKCM	841529b1-23bf-4adf-918a-021e8c1876a9-111122_UNC15-SN850_0149_BC0588ACXX_1_GATCAG	2031.97	19.4	18.1551	95.15	95.6833	0.475965	0.766035	2.15122	0.395544	0.760819	0.114941	5	0.546908	0.758175	2.13438	0.395473	0.760819	0.114941	4	40080	18.9344	19.3887	95.5675	94.1184	0.727108	2.98905	19.8668	0.912223	0.223155	0.110096	61	0.724632	2.69097	14.746	0.886898	0.223155	0.188537	41	260.987	14.3333	13.8442	94.89	93.2161	0.883932	0.971098
TCGA-DA-A1HW-06A-11R-A18U-07	a582d927-9110-4c8d-929a-bb99b5fcdc72	5d4390cc-c091-4844-b40c-f936ab881e61	SKCM	a582d927-9110-4c8d-929a-bb99b5fcdc72-120221_UNC14-SN744_0207_AC0F2EACXX_3_GCCAAT	344.937	15	15.6323	96.055	93.5607	0.688449	0.477197	1.61155	0.300111	0.81614	0.18386	2	0.688449	0.477197	1.61155	0.300111	0.81614	0.18386	2	148941	16.4744	16.4165	98.539	98.5237	0.734002	3.70661	40.7153	0.945454	0.16691	0.0884764	156	0.774768	3.45109	31.5346	0.939552	0.16759	0.0891697	86	409.7	19	19	100	100	NA	0
TCGA-DA-A1HY-06A-11R-A18T-07	f294e77c-93d2-49e5-900a-90bb8eaec0e5	1e4be071-ebc0-4eba-b66f-abd178f60ea1	SKCM	f294e77c-93d2-49e5-900a-90bb8eaec0e5-120201_UNC11-SN627_0182_BD0MYMACXX_3_TTAGGC	NA	NA	NA	NA	NA	NA	NA	NA	NA	NA	NA	NA	NA	NA	NA	NA	NA	NA	NA	4232.59	19.25	17.7766	92.27	92.8051	0.611224	0.847336	2.33342	0.428283	0.739656	0.117906	4	0.611224	0.847336	2.33342	0.428283	0.739656	0.117906	4	NA	NA	NA	NA	NA	NA	NA
TCGA-DA-A1I0-06A-11R-A20F-07	1f1b8abd-9770-42eb-b4dd-d26f9108ae7e	df1c6f54-51a3-4a76-9ba7-281904144ffc	SKCM	1f1b8abd-9770-42eb-b4dd-d26f9108ae7e-120327_UNC10-SN254_0342_BC0LCYACXX_3_ACAGTG	NA	NA	NA	NA	NA	NA	NA	NA	NA	NA	NA	NA	NA	NA	NA	NA	NA	NA	NA	691.135	15.5	15.326	96.97	95.9157	0.910807	0.631323	1.8801	0.439461	0.673981	0.326019	2	0.910807	0.631323	1.8801	0.439461	0.673981	0.326019	2	NA	NA	NA	NA	NA	NA	NA
TCGA-DA-A1I1-06A-12R-A18U-07	cb73e736-3b44-4346-8305-73a90fdef467	a835c374-32b1-491b-811e-e3a0c5012818	SKCM	cb73e736-3b44-4346-8305-73a90fdef467-120220_UNC9-SN296_0273_BD0MN6ACXX_3_TGACCA	499.763	16	16	91.23	91.23	NA	0	1	0	1	NA	1	NA	0	1	0	1	NA	1	25676.8	18.5357	21.3326	93.5489	92.7154	0.700629	2.33464	10.3257	0.825655	0.355431	0.170749	28	0.666906	2.14669	8.55648	0.77862	0.421328	0.171164	25	422.305	13.3333	13.4748	91.09	90.9693	0.880785	0.967641
TCGA-DA-A1I2-06A-21R-A18U-07	e810eeba-eca8-4792-a9d5-fbe7da7ad416	92767f50-7543-4312-93ff-f17a084bda26	SKCM	e810eeba-eca8-4792-a9d5-fbe7da7ad416-120221_UNC14-SN744_0207_AC0F2EACXX_4_CTTGTA	NA	NA	NA	NA	NA	NA	NA	NA	NA	NA	NA	NA	NA	NA	NA	NA	NA	NA	NA	22441.7	17.4762	17.0355	97.7557	96.2921	0.635629	1.93519	6.92533	0.714533	0.512681	0.0717438	21	0.672423	1.90512	6.7202	0.711346	0.515529	0.0734136	17	144.566	18	18	99.1	99.1	NA	0
TCGA-DA-A1I4-06A-11R-A18U-07	113e7077-3f77-4672-8766-26c35379cf53	2c685f5e-c907-48f1-aec9-ff4fa365823c	SKCM	113e7077-3f77-4672-8766-26c35379cf53-120221_UNC14-SN744_0207_AC0F2EACXX_4_ACAGTG	NA	NA	NA	NA	NA	NA	NA	NA	NA	NA	NA	NA	NA	NA	NA	NA	NA	NA	NA	NA	NA	NA	NA	NA	NA	NA	NA	NA	NA	NA	NA	NA	NA	NA	NA	NA	NA	NA	NA	NA	NA	NA	NA	NA	NA
TCGA-DA-A1I5-06A-11R-A18T-07	3d982dd3-83e5-4ac0-913c-6377b884cf91	641b06e6-a787-4ad1-9bfa-ea27eb675829	SKCM	3d982dd3-83e5-4ac0-913c-6377b884cf91-120118_UNC12-SN629_0179_AC0C6CACXX_6_GGCTAC	NA	NA	NA	NA	NA	NA	NA	NA	NA	NA	NA	NA	NA	NA	NA	NA	NA	NA	NA	39792	19.1087	18.6697	94.1252	93.7741	0.828829	3.17329	23.8859	0.939758	0.118731	0.104697	46	0.846963	3.1029	22.2624	0.936379	0.11962	0.119018	39	1795.08	19	20.7834	95.6057	95.9005	0.946833	1.84245
TCGA-DA-A1I7-06A-22R-A18S-07	79d59795-ca00-4140-a2f9-4dbde6ea22cb	8000da33-0855-41b1-8ff8-503c8a7293a0	SKCM	79d59795-ca00-4140-a2f9-4dbde6ea22cb-120118_UNC12-SN629_0179_AC0C6CACXX_6_TTAGGC	NA	NA	NA	NA	NA	NA	NA	NA	NA	NA	NA	NA	NA	NA	NA	NA	NA	NA	NA	9945.68	18.1429	17.0353	93.6286	93.7708	0.424812	0.826645	2.28564	0.374166	0.779761	0.1264	7	0.424812	0.826645	2.28564	0.374166	0.779761	0.1264	7	594.762	27	27	88.72	88.72	NA	0
TCGA-DA-A1I8-06A-11R-A18T-07	03c2f6ba-caef-41e1-ad3e-7a0a76d9f4f7	a4f282c0-b938-44b1-a34d-bd7e2ece4dc5	SKCM	03c2f6ba-caef-41e1-ad3e-7a0a76d9f4f7-120124_UNC16-SN851_0123_AC0FDJACXX_2_TAGCTT	NA	NA	NA	NA	NA	NA	NA	NA	NA	NA	NA	NA	NA	NA	NA	NA	NA	NA	NA	NA	NA	NA	NA	NA	NA	NA	NA	NA	NA	NA	NA	NA	NA	NA	NA	NA	NA	NA	NA	NA	NA	NA	NA	NA	NA
TCGA-DA-A1IA-06A-11R-A18S-07	7b51a58a-5d50-44e1-b277-d8172518eead	6638cd8e-932b-438a-8c14-9aa5c87e9cf3	SKCM	7b51a58a-5d50-44e1-b277-d8172518eead-111122_UNC15-SN850_0149_BC0588ACXX_2_ACTTGA	NA	NA	NA	NA	NA	NA	NA	NA	NA	NA	NA	NA	NA	NA	NA	NA	NA	NA	NA	NA	NA	NA	NA	NA	NA	NA	NA	NA	NA	NA	NA	NA	NA	NA	NA	NA	NA	NA	NA	NA	NA	NA	NA	NA	NA
TCGA-DA-A1IB-06A-11R-A18S-07	80912ee2-27cd-4151-9386-5c18eb645547	25672b5b-2ac2-41dc-9aa0-a9968d05430d	SKCM	80912ee2-27cd-4151-9386-5c18eb645547-111122_UNC15-SN850_0149_BC0588ACXX_2_GATCAG	4931.85	16.7222	16.6639	92.6039	91.105	0.884876	2.55762	12.9051	0.9005	0.207647	0.120286	18	0.887187	2.4598	11.7025	0.894422	0.207647	0.124884	16	113324	16.3956	16.6291	95.2216	96.2967	0.737655	3.83876	46.468	0.943136	0.149366	0.149366	182	0.682306	3.14214	23.1533	0.861055	0.352525	0.066015	100	724.372	23	23	98.55	98.2285	0.646412	0.448058
TCGA-DA-A1IC-06A-11R-A18S-07	f8e6851f-a0cf-4b0c-bd7f-56debb0d6605	7e21edf0-fc0d-416d-82f0-a29e97f683d3	SKCM	f8e6851f-a0cf-4b0c-bd7f-56debb0d6605-111122_UNC15-SN850_0149_BC0588ACXX_3_GGCTAC	NA	NA	NA	NA	NA	NA	NA	NA	NA	NA	NA	NA	NA	NA	NA	NA	NA	NA	NA	NA	NA	NA	NA	NA	NA	NA	NA	NA	NA	NA	NA	NA	NA	NA	NA	NA	NA	NA	NA	NA	NA	NA	NA	NA	NA
TCGA-DA-A3F2-06A-11R-A20F-07	a29dc584-dc63-4249-b5e7-5503aae9d0cf	c2ea4b59-2525-4c6c-a46a-a8d0bdeef9f3	SKCM	a29dc584-dc63-4249-b5e7-5503aae9d0cf-130807_UNC12-SN629_0324_AC2B36ACXX_3_ACTTGA	24444.3	15.8824	16.3166	98.6794	99.0527	0.600899	2.11899	8.32271	0.746839	0.474335	0.1275	34	0.624039	1.98323	7.26618	0.742679	0.474335	0.1275	24	155937	16.3047	18.0522	97.7137	97.6754	0.751094	3.64433	38.2571	0.957793	0.108354	0.0683587	128	0.784068	2.93059	18.7387	0.920338	0.173583	0.125272	42	1271.23	12.3333	15.5205	96.2133	91.6196	0.517781	0.92774
TCGA-DA-A3F3-06A-11R-A20F-07	3475d243-435d-4e5b-bae7-37ab4bce7212	a4bc78e7-1b6e-47de-8209-0beaa63dd4b9	SKCM	3475d243-435d-4e5b-bae7-37ab4bce7212-120327_UNC10-SN254_0342_BC0LCYACXX_4_CTTGTA	NA	NA	NA	NA	NA	NA	NA	NA	NA	NA	NA	NA	NA	NA	NA	NA	NA	NA	NA	2729.12	18	17.8086	91.7364	90.4367	0.89397	2.14365	8.53048	0.85782	0.219704	0.219121	11	0.89397	2.14365	8.53048	0.85782	0.219704	0.219121	11	NA	NA	NA	NA	NA	NA	NA
TCGA-DA-A3F5-06A-11R-A20F-07	0324c3ce-3e7a-4ecd-87ef-3d02b591c0b0	2b6b5499-a092-4fb6-a670-ad599db4f2cb	SKCM	0324c3ce-3e7a-4ecd-87ef-3d02b591c0b0-120327_UNC10-SN254_0342_BC0LCYACXX_4_CAGATC	NA	NA	NA	NA	NA	NA	NA	NA	NA	NA	NA	NA	NA	NA	NA	NA	NA	NA	NA	NA	NA	NA	NA	NA	NA	NA	NA	NA	NA	NA	NA	NA	NA	NA	NA	NA	NA	NA	NA	NA	NA	NA	NA	NA	NA
TCGA-DA-A3F8-06A-11R-A20F-07	57e00fd4-5a1a-49d9-a190-8825b5c006f6	1beadfbe-9b12-4acb-85bf-3becb75fd573	SKCM	57e00fd4-5a1a-49d9-a190-8825b5c006f6-120327_UNC10-SN254_0342_BC0LCYACXX_5_TGACCA	5288.62	19.5385	17.8509	95.4246	91.317	0.679762	1.74355	5.71763	0.702722	0.511589	0.136278	13	0.694102	1.72478	5.61128	0.701585	0.511589	0.140449	12	42977.1	18.25	17.7581	92.4	91.9349	0.87153	3.90213	49.508	0.970774	0.0665799	0.0544462	88	0.890235	3.84358	46.6923	0.970346	0.0665799	0.0544462	75	890.954	19.5	20.1923	98.2	99.0308	0.840358	0.582492
TCGA-DA-A95V-06A-11R-A37K-07	cbfb1c2b-43c6-4688-83f2-21a7b76431b8	8bfc4614-3807-4915-8140-ad1fd72b9d2f	SKCM	cbfb1c2b-43c6-4688-83f2-21a7b76431b8-140416_UNC15-SN850_0361_AC41LKACXX_2_CGTACG	2215.82	16.6667	17.3653	92.85	93.472	0.791575	1.73927	5.69318	0.780913	0.333224	0.237704	9	0.791575	1.73927	5.69318	0.780913	0.333224	0.237704	9	77003.3	17.3836	17.0385	97.529	97.5328	0.822643	4.1699	64.709	0.974539	0.0611233	0.0556871	159	0.801369	3.51162	33.5026	0.933224	0.216546	0.0612608	80	38476.9	17.125	16.8537	96.7237	96.7884	0.453732	1.57251
TCGA-DA-A95W-06A-11R-A37K-07	5f8c6550-edc5-4e8b-af77-887aa2045a35	8c0fd12a-dea1-406a-891c-dd5a17e3c16b	SKCM	5f8c6550-edc5-4e8b-af77-887aa2045a35-140416_UNC15-SN850_0361_AC41LKACXX_3_GCCAAT	NA	NA	NA	NA	NA	NA	NA	NA	NA	NA	NA	NA	NA	NA	NA	NA	NA	NA	NA	8115.26	14.7647	15.81	94.0041	93.8753	0.775869	2.1982	9.00881	0.841919	0.282629	0.18663	17	0.793685	2.14934	8.57919	0.840652	0.282629	0.18663	15	NA	NA	NA	NA	NA	NA	NA
TCGA-DA-A95X-06A-11R-A37K-07	3a13305c-6b13-4b3a-be9b-6465cfe034b8	88441fa0-588f-4829-a353-a6b845c90333	SKCM	3a13305c-6b13-4b3a-be9b-6465cfe034b8-140416_UNC15-SN850_0361_AC41LKACXX_3_GAGTGG	NA	NA	NA	NA	NA	NA	NA	NA	NA	NA	NA	NA	NA	NA	NA	NA	NA	NA	NA	316.873	15	14.6154	92.59	92.0438	0.988111	0.684906	1.98359	0.491782	0.564103	0.435897	2	0.988111	0.684906	1.98359	0.491782	0.564103	0.435897	2	NA	NA	NA	NA	NA	NA	NA
TCGA-DA-A95Y-06A-11R-A37K-07	ab65d32e-6f4d-4059-95bb-41c932acc7ef	391d3fdd-34fb-4ac3-ac85-fe7b374c144b	SKCM	ab65d32e-6f4d-4059-95bb-41c932acc7ef-140424_UNC12-SN629_0365_AC4368ACXX_3_ACAGTG	315.415	16.5	16.0878	93.215	92.924	0.980297	0.67949	1.97287	0.486405	0.582447	0.417553	2	0.980297	0.67949	1.97287	0.486405	0.582447	0.417553	2	NA	NA	NA	NA	NA	NA	NA	NA	NA	NA	NA	NA	NA	NA	NA	NA	NA	NA	NA	NA	NA	NA	NA	NA	NA	NA
TCGA-DA-A95Z-06A-11R-A37K-07	066add2d-2a01-42f4-a38d-18bfc7417f9f	8d6eedc0-70d4-4e68-a706-6fdea2d87918	SKCM	066add2d-2a01-42f4-a38d-18bfc7417f9f-140424_UNC12-SN629_0365_AC4368ACXX_4_ATGTCA	NA	NA	NA	NA	NA	NA	NA	NA	NA	NA	NA	NA	NA	NA	NA	NA	NA	NA	NA	NA	NA	NA	NA	NA	NA	NA	NA	NA	NA	NA	NA	NA	NA	NA	NA	NA	NA	NA	NA	NA	NA	NA	NA	NA	NA
TCGA-DA-A960-01A-11R-A37K-07	a3e08b10-e16e-4e1c-ae40-8dae4db8af31	3be3b469-ecaa-4dc7-899b-8dede47b28d7	SKCM	a3e08b10-e16e-4e1c-ae40-8dae4db8af31-140424_UNC12-SN629_0365_AC4368ACXX_1_GCCAAT	NA	NA	NA	NA	NA	NA	NA	NA	NA	NA	NA	NA	NA	NA	NA	NA	NA	NA	NA	NA	NA	NA	NA	NA	NA	NA	NA	NA	NA	NA	NA	NA	NA	NA	NA	NA	NA	NA	NA	NA	NA	NA	NA	NA	NA
TCGA-EB-A1NK-01A-11R-A18T-07	964ddb0f-b91a-4e83-b18a-13ef8c85af45	132fbce2-00f3-4ae7-ba18-03bd55529d5a	SKCM	964ddb0f-b91a-4e83-b18a-13ef8c85af45-120124_UNC16-SN851_0123_AC0FDJACXX_3_GGCTAC	1155.71	16.5	14.8184	90.575	89.1524	0.643037	0.445719	1.56161	0.273775	0.836322	0.163678	2	0.643037	0.445719	1.56161	0.273775	0.836322	0.163678	2	NA	NA	NA	NA	NA	NA	NA	NA	NA	NA	NA	NA	NA	NA	NA	NA	NA	NA	NA	NA	NA	NA	NA	NA	NA	NA
TCGA-EB-A24C-01A-11R-A18T-07	53a41f73-62c0-4a25-a490-cdd5d0084f5c	cc0cd3e6-a133-4796-ab06-5adb905d5184	SKCM	53a41f73-62c0-4a25-a490-cdd5d0084f5c-120221_UNC14-SN744_0207_AC0F2EACXX_5_CTTGTA	113.007	17	17	95.11	95.11	NA	0	1	0	1	NA	1	NA	0	1	0	1	NA	1	7410.24	15.75	12.3283	89.8425	89.1699	0.233877	0.324223	1.38296	0.136877	0.92769	0.0467786	4	0.233877	0.324223	1.38296	0.136877	0.92769	0.0467786	4	NA	NA	NA	NA	NA	NA	NA
TCGA-EB-A24D-01A-11R-A18T-07	9d64fe50-c860-4a40-baac-d3ba2073e742	f684abbc-ff21-4042-a5d8-2a0f3e22bd59	SKCM	9d64fe50-c860-4a40-baac-d3ba2073e742-120124_UNC16-SN851_0123_AC0FDJACXX_4_GGCTAC	275.989	15	15	84.42	84.42	NA	0	1	0	1	NA	1	NA	0	1	0	1	NA	1	135769	16.6299	15.6866	93.3938	94.2927	0.657733	3.18618	24.1959	0.866848	0.342034	0.0724968	127	0.680524	2.94717	19.0519	0.859358	0.348683	0.0724968	76	NA	NA	NA	NA	NA	NA	NA
TCGA-EB-A299-01A-21R-A18U-07	58e902a9-97fe-45e0-9259-258dfa8e3745	e1be8377-176c-4f4c-b3aa-86bbb6cd0f3a	SKCM	58e902a9-97fe-45e0-9259-258dfa8e3745-120220_UNC9-SN296_0273_BD0MN6ACXX_4_CTTGTA	NA	NA	NA	NA	NA	NA	NA	NA	NA	NA	NA	NA	NA	NA	NA	NA	NA	NA	NA	NA	NA	NA	NA	NA	NA	NA	NA	NA	NA	NA	NA	NA	NA	NA	NA	NA	NA	NA	NA	NA	NA	NA	NA	NA	NA
TCGA-EB-A3HV-01A-11R-A21D-07	5f72db39-dad5-464e-9008-6e88a9d1bfe8	698d84bf-2cf3-4d9e-b899-8152052a7fbc	SKCM	5f72db39-dad5-464e-9008-6e88a9d1bfe8-120327_UNC10-SN254_0342_BC0LCYACXX_5_TAGCTT	NA	NA	NA	NA	NA	NA	NA	NA	NA	NA	NA	NA	NA	NA	NA	NA	NA	NA	NA	228.254	17	17	86.22	86.22	NA	0	1	0	1	NA	1	NA	0	1	0	1	NA	1	NA	NA	NA	NA	NA	NA	NA
TCGA-EB-A3XB-01A-11R-A239-07	693243f6-a5bb-4411-90d3-d620a6480ce4	16E9CF50-2B80-4501-B7C9-B44494842A14	SKCM	693243f6-a5bb-4411-90d3-d620a6480ce4-120817_UNC9-SN296_0312_AC0WHCACXX_3_TGACCA	824.845	17.3333	17.5138	95.3933	94.8268	0.926363	1.01771	2.76686	0.616947	0.47619	0.359649	3	0.926363	1.01771	2.76686	0.616947	0.47619	0.359649	3	5808.02	17.0588	17.2342	91.1006	90.5537	0.895438	2.53697	12.6413	0.901421	0.177078	0.169247	17	0.895438	2.53697	12.6413	0.901421	0.177078	0.169247	17	NA	NA	NA	NA	NA	NA	NA
TCGA-EB-A3XC-01A-11R-A239-07	b7e3f90d-747a-42da-b5ba-7b6479420fd3	8B4C42A9-7D09-4989-A0E2-43ABB6097137	SKCM	b7e3f90d-747a-42da-b5ba-7b6479420fd3-120817_UNC9-SN296_0312_AC0WHCACXX_4_CAGATC	NA	NA	NA	NA	NA	NA	NA	NA	NA	NA	NA	NA	NA	NA	NA	NA	NA	NA	NA	557.958	14.2	12.506	93.436	91.9173	0.836956	1.34703	3.84598	0.668263	0.522782	0.136691	5	0.836956	1.34703	3.84598	0.668263	0.522782	0.136691	5	NA	NA	NA	NA	NA	NA	NA
TCGA-EB-A3XD-01A-22R-A239-07	d36ee832-b7ba-4981-a0b4-8b612733b333	B045331F-5CB5-4BE4-896F-E4C60D5AAD8F	SKCM	d36ee832-b7ba-4981-a0b4-8b612733b333-120817_UNC9-SN296_0312_AC0WHCACXX_4_AGTTCC	NA	NA	NA	NA	NA	NA	NA	NA	NA	NA	NA	NA	NA	NA	NA	NA	NA	NA	NA	13786.9	18.1429	19.8123	91.4114	90.4	0.782938	2.92636	18.6596	0.899424	0.237495	0.12894	42	0.784356	2.91276	18.4076	0.899218	0.237495	0.12894	41	155.53	19	18.3947	92.425	92.6257	0.970435	0.672654
TCGA-EB-A3XE-01A-12R-A239-07	29cb7b49-c4c8-49c1-a2d3-7fce1aa0f15b	B28D2B0F-9C6C-451C-A77B-5BEAA8C46FAD	SKCM	29cb7b49-c4c8-49c1-a2d3-7fce1aa0f15b-120817_UNC9-SN296_0312_AC0WHCACXX_5_ACAGTG	NA	NA	NA	NA	NA	NA	NA	NA	NA	NA	NA	NA	NA	NA	NA	NA	NA	NA	NA	1263.89	17.8	17.776	90.558	89.4187	0.707099	1.13803	3.12062	0.555222	0.639947	0.135348	5	0.707099	1.13803	3.12062	0.555222	0.639947	0.135348	5	NA	NA	NA	NA	NA	NA	NA
TCGA-EB-A3XF-01A-31R-A239-07	a8054741-4e86-44de-895b-7dce74bcbeed	FE6954B6-8214-41D8-B7F9-2CED8727408D	SKCM	a8054741-4e86-44de-895b-7dce74bcbeed-120817_UNC9-SN296_0312_AC0WHCACXX_5_CAGATC	NA	NA	NA	NA	NA	NA	NA	NA	NA	NA	NA	NA	NA	NA	NA	NA	NA	NA	NA	NA	NA	NA	NA	NA	NA	NA	NA	NA	NA	NA	NA	NA	NA	NA	NA	NA	NA	NA	NA	NA	NA	NA	NA	NA	NA
TCGA-EB-A3Y6-01A-21R-A239-07	21e750de-4f75-44f3-8303-ca4202351359	263DE7AD-D70E-4E10-B406-1D2E368A99B2	SKCM	21e750de-4f75-44f3-8303-ca4202351359-120817_UNC9-SN296_0312_AC0WHCACXX_6_TGACCA	NA	NA	NA	NA	NA	NA	NA	NA	NA	NA	NA	NA	NA	NA	NA	NA	NA	NA	NA	NA	NA	NA	NA	NA	NA	NA	NA	NA	NA	NA	NA	NA	NA	NA	NA	NA	NA	NA	NA	NA	NA	NA	NA	NA	NA
TCGA-EB-A3Y7-01A-11R-A239-07	2199dad1-7efd-4624-ae1d-ea355d91c95c	BA8BA1AC-8313-49F7-BE6F-10A6AA774DFE	SKCM	2199dad1-7efd-4624-ae1d-ea355d91c95c-120817_UNC9-SN296_0312_AC0WHCACXX_6_CAGATC	NA	NA	NA	NA	NA	NA	NA	NA	NA	NA	NA	NA	NA	NA	NA	NA	NA	NA	NA	275.3	16	16	94.08	94.0163	0.938602	0.650589	1.91667	0.458049	0.644829	0.355171	2	NA	0	1	0	1	NA	1	NA	NA	NA	NA	NA	NA	NA
TCGA-EB-A41A-01A-11R-A24X-07	94231feb-4a35-46bf-9a98-b2c082ca9d0a	57e2418c-e87f-4dcd-9e9d-1e2eb4e68ef0	SKCM	94231feb-4a35-46bf-9a98-b2c082ca9d0a-130115_UNC11-SN627_0275_AD1MF3ACXX_4_CTTGTA	NA	NA	NA	NA	NA	NA	NA	NA	NA	NA	NA	NA	NA	NA	NA	NA	NA	NA	NA	913.169	15.6	15.7985	87.194	87.8548	0.975206	1.56953	4.80441	0.783145	0.30303	0.219697	5	0.975206	1.56953	4.80441	0.783145	0.30303	0.219697	5	NA	NA	NA	NA	NA	NA	NA
TCGA-EB-A41B-01A-11R-A24X-07	5457e809-98f9-4cd8-aae2-c899b2b8bc5a	53bce93f-fa43-4596-839b-5d7d258de40c	SKCM	5457e809-98f9-4cd8-aae2-c899b2b8bc5a-130115_UNC11-SN627_0275_AD1MF3ACXX_4_AGTCAA	NA	NA	NA	NA	NA	NA	NA	NA	NA	NA	NA	NA	NA	NA	NA	NA	NA	NA	NA	NA	NA	NA	NA	NA	NA	NA	NA	NA	NA	NA	NA	NA	NA	NA	NA	NA	NA	NA	NA	NA	NA	NA	NA	NA	NA
TCGA-EB-A42Y-01A-12R-A24X-07	d0910b79-81ae-4f05-b36f-bd181f481ab5	c64dae2c-79f4-475b-92cc-b6080752040e	SKCM	d0910b79-81ae-4f05-b36f-bd181f481ab5-130115_UNC11-SN627_0275_AD1MF3ACXX_5_AGTTCC	NA	NA	NA	NA	NA	NA	NA	NA	NA	NA	NA	NA	NA	NA	NA	NA	NA	NA	NA	90.2924	20	20	96.76	96.76	NA	0	1	0	1	NA	1	NA	0	1	0	1	NA	1	NA	NA	NA	NA	NA	NA	NA
TCGA-EB-A42Z-01A-12R-A24X-07	04435736-e670-45eb-b2c7-fb3d0810cf36	211b5190-b873-4c7c-858e-d0b321ac8ffb	SKCM	04435736-e670-45eb-b2c7-fb3d0810cf36-130115_UNC11-SN627_0275_AD1MF3ACXX_5_ATGTCA	NA	NA	NA	NA	NA	NA	NA	NA	NA	NA	NA	NA	NA	NA	NA	NA	NA	NA	NA	NA	NA	NA	NA	NA	NA	NA	NA	NA	NA	NA	NA	NA	NA	NA	NA	NA	NA	NA	NA	NA	NA	NA	NA	NA	NA
TCGA-EB-A430-01A-11R-A24X-07	517f7bb0-a9ca-4220-b722-453cda5f2e82	99fa82f0-527e-4ed6-bead-516c21ab97be	SKCM	517f7bb0-a9ca-4220-b722-453cda5f2e82-130115_UNC11-SN627_0275_AD1MF3ACXX_6_CCGTCC	1938.16	19.3333	16.8386	84.45	83.0018	0.512181	0.562689	1.75539	0.292291	0.83227	0.105867	3	0.512181	0.562689	1.75539	0.292291	0.83227	0.105867	3	5296.57	18.6923	18.9384	87.6531	87.4245	0.910283	2.33483	10.3277	0.885889	0.209102	0.143991	13	0.929059	2.30863	10.0606	0.885174	0.209102	0.143991	12	NA	NA	NA	NA	NA	NA	NA
TCGA-EB-A431-01A-11R-A266-07	b925a1ba-d685-45f4-b3c3-20c8f5d73e38	d19e0e12-91bc-4ba0-b966-f29e3ba9c1c4	SKCM	b925a1ba-d685-45f4-b3c3-20c8f5d73e38-130405_UNC9-SN296_0354_AC24DCACXX_7_TTAGGC	NA	NA	NA	NA	NA	NA	NA	NA	NA	NA	NA	NA	NA	NA	NA	NA	NA	NA	NA	NA	NA	NA	NA	NA	NA	NA	NA	NA	NA	NA	NA	NA	NA	NA	NA	NA	NA	NA	NA	NA	NA	NA	NA	NA	NA
TCGA-EB-A44N-01A-11R-A266-07	20f2f43b-3fa5-4ab6-b6f3-c6820317936b	bccae620-c677-4793-afe6-942ca71b8aa9	SKCM	20f2f43b-3fa5-4ab6-b6f3-c6820317936b-130405_UNC9-SN296_0354_AC24DCACXX_7_TAGCTT	713.866	19.2222	18.3526	87.5233	87.1045	0.921808	2.02542	7.5793	0.856944	0.214879	0.174547	9	0.977577	1.90228	6.70114	0.845122	0.214879	0.174547	7	8865.98	17.7391	17.8084	89.2178	87.4957	0.822427	3.14878	23.3076	0.910801	0.260801	0.0642413	46	0.844853	3.02755	20.6465	0.907962	0.260801	0.0642413	36	NA	NA	NA	NA	NA	NA	NA
TCGA-EB-A44O-01A-11R-A266-07	c6e068a5-bda4-452f-b2eb-7f241c767aae	ca261986-2f65-4998-89b7-e9c55a972574	SKCM	c6e068a5-bda4-452f-b2eb-7f241c767aae-130405_UNC9-SN296_0354_AC24DCACXX_8_GTTTCG	NA	NA	NA	NA	NA	NA	NA	NA	NA	NA	NA	NA	NA	NA	NA	NA	NA	NA	NA	NA	NA	NA	NA	NA	NA	NA	NA	NA	NA	NA	NA	NA	NA	NA	NA	NA	NA	NA	NA	NA	NA	NA	NA	NA	NA
TCGA-EB-A44P-01A-11R-A266-07	56fcf52a-50a0-4d79-a280-0528e555d517	b52048c3-ea1d-43b4-8276-c2476181b0aa	SKCM	56fcf52a-50a0-4d79-a280-0528e555d517-130405_UNC9-SN296_0354_AC24DCACXX_8_ACTTGA	NA	NA	NA	NA	NA	NA	NA	NA	NA	NA	NA	NA	NA	NA	NA	NA	NA	NA	NA	NA	NA	NA	NA	NA	NA	NA	NA	NA	NA	NA	NA	NA	NA	NA	NA	NA	NA	NA	NA	NA	NA	NA	NA	NA	NA
TCGA-EB-A44Q-06A-11R-A266-07	9e74ed10-91aa-44b7-9d04-7acb5d40fd85	9468dafd-1f25-4bb6-a92b-478a2e3347d0	SKCM	9e74ed10-91aa-44b7-9d04-7acb5d40fd85-130503_UNC9-SN296_0361_AC23VLACXX_2_GTGGCC	149.864	20	20	84.26	84.26	NA	0	1	0	1	NA	1	NA	0	1	0	1	NA	1	2853.04	17.8235	18.7982	92.9706	92.5313	0.91066	2.58009	13.1984	0.903349	0.204514	0.138542	17	0.933291	2.46301	11.7401	0.898139	0.204514	0.138542	14	NA	NA	NA	NA	NA	NA	NA
TCGA-EB-A44R-06A-41R-A266-07	51b4f189-f471-46c8-9a83-45dea4ff3348	6d6ae00d-66bd-4a2b-9715-9b7347d1035e	SKCM	51b4f189-f471-46c8-9a83-45dea4ff3348-130423_UNC11-SN627_0293_AC23BAACXX_7_ATCACG	96.8913	23	23	85.99	85.99	NA	0	1	0	1	NA	1	NA	0	1	0	1	NA	1	19169	16.7222	15.4486	92.8594	93.599	0.624074	1.80381	6.07272	0.755857	0.355237	0.31015	18	0.635956	1.8018	6.06054	0.755837	0.355237	0.31015	17	1289.62	15	14.6086	93.095	92.4511	0.886463	0.614449
TCGA-EB-A4IQ-01A-12R-A266-07	fd85644a-09d9-4b61-993a-2da90f7907b0	627117b2-d9b5-4549-92e3-8677ddfdd1c9	SKCM	fd85644a-09d9-4b61-993a-2da90f7907b0-130423_UNC11-SN627_0293_AC23BAACXX_8_TAGCTT	NA	NA	NA	NA	NA	NA	NA	NA	NA	NA	NA	NA	NA	NA	NA	NA	NA	NA	NA	NA	NA	NA	NA	NA	NA	NA	NA	NA	NA	NA	NA	NA	NA	NA	NA	NA	NA	NA	NA	NA	NA	NA	NA	NA	NA
TCGA-EB-A4IS-01A-21R-A266-07	ff80dcbf-5779-494b-962d-9be916d86df8	eb7d8769-1014-4a97-bf28-c6bdd257b9b7	SKCM	ff80dcbf-5779-494b-962d-9be916d86df8-130503_UNC9-SN296_0361_AC23VLACXX_1_GTGGCC	58634.2	18.6744	18.8538	87.6391	88.1164	0.310844	1.16914	3.21924	0.351877	0.804039	0.0224041	43	0.29796	1.07591	2.93266	0.328188	0.818681	0.0224041	37	50656.4	17.1901	17.5129	88.388	88.5483	0.892353	4.42235	83.2916	0.981049	0.0604382	0.0592992	142	0.900655	4.34141	76.8158	0.979887	0.0604382	0.0592992	124	6727.55	14.6	14.3739	97.494	97.792	0.88838	1.42979
TCGA-EB-A4OY-01A-11R-A266-07	1baad8de-4a9d-4381-8970-02063c295ccc	3f0e21a1-5cc9-4ff0-81c2-4d67a440dca2	SKCM	1baad8de-4a9d-4381-8970-02063c295ccc-130503_UNC9-SN296_0361_AC23VLACXX_1_ACTTGA	NA	NA	NA	NA	NA	NA	NA	NA	NA	NA	NA	NA	NA	NA	NA	NA	NA	NA	NA	665.632	18.6667	20.1061	95.765	94.7682	0.910906	1.63212	5.11473	0.786212	0.30742	0.23311	6	0.958304	1.54233	4.67548	0.772983	0.30742	0.261484	5	NA	NA	NA	NA	NA	NA	NA
TCGA-EB-A4OZ-01A-12R-A266-07	4a4274c6-a34b-4f23-9597-b561e7ed3357	fbbc0349-e189-4f35-8c96-15c57b53f602	SKCM	4a4274c6-a34b-4f23-9597-b561e7ed3357-130503_UNC9-SN296_0361_AC23VLACXX_1_GGCTAC	NA	NA	NA	NA	NA	NA	NA	NA	NA	NA	NA	NA	NA	NA	NA	NA	NA	NA	NA	233.135	16	16	85.09	85.09	NA	0	1	0	1	NA	1	NA	0	1	0	1	NA	1	NA	NA	NA	NA	NA	NA	NA
TCGA-EB-A4P0-01A-41R-A266-07	bd7f0212-7a22-4b76-b5ed-f7879bad4c6b	f1106aed-99c5-4504-9297-7e4e6c722182	SKCM	bd7f0212-7a22-4b76-b5ed-f7879bad4c6b-130503_UNC9-SN296_0361_AC23VLACXX_2_ATCACG	NA	NA	NA	NA	NA	NA	NA	NA	NA	NA	NA	NA	NA	NA	NA	NA	NA	NA	NA	NA	NA	NA	NA	NA	NA	NA	NA	NA	NA	NA	NA	NA	NA	NA	NA	NA	NA	NA	NA	NA	NA	NA	NA	NA	NA
TCGA-EB-A4XL-01A-11R-A27Q-07	a5da152f-1c85-4985-8cb0-576f9d0a4c3b	f77473c0-198d-4993-9a5e-8b345ad0a485	SKCM	a5da152f-1c85-4985-8cb0-576f9d0a4c3b-130412_UNC10-SN254_0452_BC22WAACXX_2_ACTTGA	NA	NA	NA	NA	NA	NA	NA	NA	NA	NA	NA	NA	NA	NA	NA	NA	NA	NA	NA	2204.49	17.75	20.3935	91.04	91.5436	0.808081	1.68036	5.36748	0.74378	0.44072	0.182747	8	0.808081	1.68036	5.36748	0.74378	0.44072	0.182747	8	91.0278	16	16	100	100	NA	0
TCGA-EB-A51B-01A-11R-A27Q-07	f3b54c1c-807c-4b8a-adf8-83e7f01daf69	035590dc-c5f6-461e-9160-b4e2b6faea29	SKCM	f3b54c1c-807c-4b8a-adf8-83e7f01daf69-130412_UNC10-SN254_0452_BC22WAACXX_2_GGCTAC	NA	NA	NA	NA	NA	NA	NA	NA	NA	NA	NA	NA	NA	NA	NA	NA	NA	NA	NA	NA	NA	NA	NA	NA	NA	NA	NA	NA	NA	NA	NA	NA	NA	NA	NA	NA	NA	NA	NA	NA	NA	NA	NA	NA	NA
TCGA-EB-A550-01A-61R-A27Q-07	67a65dd6-9352-4ce8-b06b-f7b7f1b312ab	d1bbd8aa-a941-4640-ac65-0d8335f8f998	SKCM	67a65dd6-9352-4ce8-b06b-f7b7f1b312ab-130412_UNC10-SN254_0452_BC22WAACXX_3_GTTTCG	2102.24	17.5	17.1883	89.94	89.005	0.697961	0.48379	1.62221	0.305722	0.811672	0.188328	2	0.697961	0.48379	1.62221	0.305722	0.811672	0.188328	2	102.977	17.5	17.3884	91.5	91.5134	0.963746	0.668018	1.95037	0.475082	0.611621	0.388379	2	0.963746	0.668018	1.95037	0.475082	0.611621	0.388379	2	NA	NA	NA	NA	NA	NA	NA
TCGA-EB-A551-01A-21R-A27Q-07	9476b8d0-9618-4c43-92fa-c86760844874	f6a82106-49f5-41e7-99e1-36aaa9815760	SKCM	9476b8d0-9618-4c43-92fa-c86760844874-130412_UNC10-SN254_0452_BC22WAACXX_3_TTAGGC	344.713	10	10	94.31	94.31	NA	0	1	0	1	NA	1	NA	0	1	0	1	NA	1	84431.6	16.6471	16.5367	95.0963	94.1485	0.615576	2.42034	11.2496	0.831916	0.334461	0.184874	51	0.656887	2.29681	9.94241	0.828315	0.335923	0.185144	33	706.764	16.3333	15.5493	97.9133	97.5692	0.882009	0.968986
TCGA-EB-A553-01A-12R-A27Q-07	56627b66-ea8b-4c91-9e1d-57884d6b89eb	d3cfdddc-7b8b-4bc4-9e6c-8912894a2e52	SKCM	56627b66-ea8b-4c91-9e1d-57884d6b89eb-130412_UNC10-SN254_0452_BC22WAACXX_3_GATCAG	NA	NA	NA	NA	NA	NA	NA	NA	NA	NA	NA	NA	NA	NA	NA	NA	NA	NA	NA	NA	NA	NA	NA	NA	NA	NA	NA	NA	NA	NA	NA	NA	NA	NA	NA	NA	NA	NA	NA	NA	NA	NA	NA	NA	NA
TCGA-EB-A57M-01A-51R-A311-07	77841bb9-7595-4a06-a12c-61c9f2ac47f7	9b4ef47f-4141-4d84-b5e8-a7b6e6c2a7ef	SKCM	77841bb9-7595-4a06-a12c-61c9f2ac47f7-130722_UNC9-SN296_0385_AD2F28ACXX_4_ACTTGA	3042.65	17.75	17.1192	93.2588	94.6754	0.656865	1.36591	3.9193	0.605547	0.604844	0.0920295	8	0.696254	1.35485	3.87617	0.605179	0.604844	0.0920295	7	20047.5	16.0532	15.8524	89.969	90.7629	0.863645	3.9238	50.5921	0.963436	0.115415	0.101294	94	0.872042	3.74146	42.1595	0.957389	0.125265	0.113912	73	NA	NA	NA	NA	NA	NA	NA
TCGA-EB-A5FP-01A-11R-A27Q-07	b0612865-f98c-4f9c-8a6e-1cde3737bc07	83b592f7-21ce-4e32-aaf4-3f9402f48284	SKCM	b0612865-f98c-4f9c-8a6e-1cde3737bc07-130412_UNC10-SN254_0452_BC22WAACXX_4_ACTTGA	NA	NA	NA	NA	NA	NA	NA	NA	NA	NA	NA	NA	NA	NA	NA	NA	NA	NA	NA	NA	NA	NA	NA	NA	NA	NA	NA	NA	NA	NA	NA	NA	NA	NA	NA	NA	NA	NA	NA	NA	NA	NA	NA	NA	NA
TCGA-EB-A5KH-06A-11R-A27Q-07	f0128b07-6585-4b86-9ccb-caefbcb0f76f	a02a0949-aefd-479a-913b-aa682a880af4	SKCM	f0128b07-6585-4b86-9ccb-caefbcb0f76f-130412_UNC10-SN254_0452_BC22WAACXX_4_GGCTAC	NA	NA	NA	NA	NA	NA	NA	NA	NA	NA	NA	NA	NA	NA	NA	NA	NA	NA	NA	168.768	21	21	91.08	91.08	NA	0	1	0	1	NA	1	NA	0	1	0	1	NA	1	NA	NA	NA	NA	NA	NA	NA
TCGA-EB-A5SE-01A-11R-A311-07	e6b16bab-3711-43fd-bee5-99b024d2cc62	7a6ac7a6-7668-42eb-a64d-7af67b3a7da3	SKCM	e6b16bab-3711-43fd-bee5-99b024d2cc62-130718_UNC11-SN627_0315_AD2AVLACXX_7_CGATGT	299.394	18	18.8105	90.54	91.395	0.970181	0.672478	1.95909	0.479474	0.601307	0.398693	2	0.970181	0.672478	1.95909	0.479474	0.601307	0.398693	2	3627.95	17.4	17.7246	88.4353	87.739	0.926038	2.50776	12.2774	0.90262	0.200647	0.110955	15	0.926038	2.50776	12.2774	0.90262	0.200647	0.110955	15	NA	NA	NA	NA	NA	NA	NA
TCGA-EB-A5SF-01A-11R-A311-07	8e2cd8f4-b121-403b-bf83-66f6da646776	f3f33ed0-a747-45dd-8999-b1a46079a6dc	SKCM	8e2cd8f4-b121-403b-bf83-66f6da646776-130718_UNC11-SN627_0315_AD2AVLACXX_7_ACAGTG	NA	NA	NA	NA	NA	NA	NA	NA	NA	NA	NA	NA	NA	NA	NA	NA	NA	NA	NA	NA	NA	NA	NA	NA	NA	NA	NA	NA	NA	NA	NA	NA	NA	NA	NA	NA	NA	NA	NA	NA	NA	NA	NA	NA	NA
TCGA-EB-A5SG-06A-11R-A311-07	0519e15b-154e-4036-91ad-23cc247f8b49	1a52c8ac-cabd-4623-98d8-93ee225ab57a	SKCM	0519e15b-154e-4036-91ad-23cc247f8b49-130718_UNC11-SN627_0315_AD2AVLACXX_8_CAGATC	NA	NA	NA	NA	NA	NA	NA	NA	NA	NA	NA	NA	NA	NA	NA	NA	NA	NA	NA	159456	18.4692	18.8043	95.3088	95.1069	0.688641	3.35198	28.5594	0.929521	0.14567	0.128968	130	0.689686	2.54417	12.7327	0.864592	0.278098	0.153924	40	NA	NA	NA	NA	NA	NA	NA
TCGA-EB-A5SH-06A-11R-A311-07	dfb9e65c-239f-4cc2-8560-908136544ba0	1b2499f7-bb3e-472a-8216-68b2e137357c	SKCM	dfb9e65c-239f-4cc2-8560-908136544ba0-130718_UNC11-SN627_0315_AD2AVLACXX_8_AGTTCC	NA	NA	NA	NA	NA	NA	NA	NA	NA	NA	NA	NA	NA	NA	NA	NA	NA	NA	NA	1035.21	15	17.623	92.145	91.543	0.636604	0.88252	2.41698	0.448209	0.72459	0.110656	4	0.636604	0.88252	2.41698	0.448209	0.72459	0.110656	4	NA	NA	NA	NA	NA	NA	NA
TCGA-EB-A5UL-06A-11R-A311-07	96a826f7-bbbd-4c75-84df-4cf8352dedc9	1df21d4e-5070-4d13-897a-a6f124758589	SKCM	96a826f7-bbbd-4c75-84df-4cf8352dedc9-130718_UNC11-SN627_0315_AD2AVLACXX_8_ACAGTG	1188.41	18.4	20.006	98.786	97.9387	0.743338	1.7116	5.5378	0.75931	0.389699	0.223109	10	0.787018	1.63656	5.13745	0.755879	0.389699	0.223109	8	61181.5	16.227	17.5088	98.1845	98.1855	0.795935	4.05429	57.6445	0.969688	0.0883603	0.0783216	163	0.791099	3.25211	25.8448	0.936361	0.151738	0.109336	61	173.303	14	14	99.57	99.57	0.949086	0.657856
TCGA-EB-A5UM-01A-11R-A311-07	cbeb4c70-21fc-4a2e-a2f5-1f35e274fda5	8e85bc75-8765-4c92-b167-94ed8390f5e9	SKCM	cbeb4c70-21fc-4a2e-a2f5-1f35e274fda5-130718_UNC11-SN627_0316_BD2AUNACXX_1_CTTGTA	71.3822	19	19	93.15	93.15	NA	0	1	0	1	NA	1	NA	0	1	0	1	NA	1	9760.94	17.9677	18.4424	94.2271	94.3949	0.667501	2.29219	9.89659	0.729812	0.509818	0.0389884	31	0.653611	2.17797	8.82833	0.70836	0.530327	0.0389884	28	NA	NA	NA	NA	NA	NA	NA
TCGA-EB-A5UN-06A-11R-A311-07	31bbcf89-0b11-4c5c-b857-589c10566562	2ab62da1-4896-4aab-b598-a95d033d93de	SKCM	31bbcf89-0b11-4c5c-b857-589c10566562-130722_UNC9-SN296_0385_AD2F28ACXX_4_ATCACG	NA	NA	NA	NA	NA	NA	NA	NA	NA	NA	NA	NA	NA	NA	NA	NA	NA	NA	NA	NA	NA	NA	NA	NA	NA	NA	NA	NA	NA	NA	NA	NA	NA	NA	NA	NA	NA	NA	NA	NA	NA	NA	NA	NA	NA
TCGA-EB-A5VU-01A-21R-A32P-07	60c329fe-b920-4229-ba96-81dc21f22211	904651ef-61fe-4452-b9ee-0e2821794a1e	SKCM	60c329fe-b920-4229-ba96-81dc21f22211-131015_UNC11-SN627_0327_AC2ND3ACXX_1_ACTTGA	NA	NA	NA	NA	NA	NA	NA	NA	NA	NA	NA	NA	NA	NA	NA	NA	NA	NA	NA	NA	NA	NA	NA	NA	NA	NA	NA	NA	NA	NA	NA	NA	NA	NA	NA	NA	NA	NA	NA	NA	NA	NA	NA	NA	NA
TCGA-EB-A5VV-06A-11R-A32P-07	3fda3a37-bcf6-45c6-a7f3-a822dde483f7	02c76d24-f1d2-4029-95b4-8be3bda8fdbe	SKCM	3fda3a37-bcf6-45c6-a7f3-a822dde483f7-131015_UNC11-SN627_0327_AC2ND3ACXX_1_TAGCTT	107.035	14	14	89.915	89.8911	0.991084	0.686967	1.98768	0.493832	0.555532	0.444468	2	NA	0	1	0	1	NA	1	1453.7	18.6667	17.9324	91.8825	92.0112	0.944804	2.34775	10.462	0.890386	0.217756	0.103395	12	0.961823	2.21468	9.15847	0.87977	0.217756	0.133677	10	NA	NA	NA	NA	NA	NA	NA
TCGA-EB-A6L9-06A-11R-A32P-07	71040dfc-a150-45e3-a19f-d59bee02f9a4	e70174b7-a2d3-4136-9da4-28a9cf123759	SKCM	71040dfc-a150-45e3-a19f-d59bee02f9a4-131015_UNC11-SN627_0327_AC2ND3ACXX_1_ACAGTG	1583.61	20.3333	19.4996	91.7478	91.2974	0.827704	1.81865	6.16354	0.80104	0.293345	0.261375	9	0.886933	1.72589	5.61753	0.796081	0.293345	0.261375	7	11964.7	18.3529	19.2474	96.7212	96.325	0.854811	3.36097	28.817	0.947228	0.125144	0.113298	51	0.891555	3.08989	21.9748	0.939139	0.125144	0.113298	32	NA	NA	NA	NA	NA	NA	NA
TCGA-EB-A6QY-01A-12R-A32P-07	453b4a5f-30dd-4ebb-b4bc-d25a5d3d9279	bb63bf5c-23d6-426f-96e2-db77aff678b3	SKCM	453b4a5f-30dd-4ebb-b4bc-d25a5d3d9279-131015_UNC11-SN627_0327_AC2ND3ACXX_2_GTGGCC	538.32	16.6667	15.0093	94.1467	94.6532	0.908994	0.998632	2.71456	0.602665	0.515829	0.325885	3	0.908994	0.998632	2.71456	0.602665	0.515829	0.325885	3	1017.5	19.25	19.4768	92.605	92.9143	0.948734	1.31522	3.72559	0.716752	0.365517	0.295567	4	0.948734	1.31522	3.72559	0.716752	0.365517	0.295567	4	NA	NA	NA	NA	NA	NA	NA
TCGA-EB-A6QZ-01A-12R-A32P-07	65e53982-0c67-4367-899e-195caf2770d8	90acf286-18d7-40ff-ac1a-d56e0ced5c89	SKCM	65e53982-0c67-4367-899e-195caf2770d8-131015_UNC11-SN627_0327_AC2ND3ACXX_2_GTCCGC	NA	NA	NA	NA	NA	NA	NA	NA	NA	NA	NA	NA	NA	NA	NA	NA	NA	NA	NA	NA	NA	NA	NA	NA	NA	NA	NA	NA	NA	NA	NA	NA	NA	NA	NA	NA	NA	NA	NA	NA	NA	NA	NA	NA	NA
TCGA-EB-A6R0-01A-12R-A32P-07	e1913e92-7df0-4c05-bf33-6d8f9ad43fa6	10f253bd-1cdd-4515-a7fa-b9ed6e1a1790	SKCM	e1913e92-7df0-4c05-bf33-6d8f9ad43fa6-131015_UNC11-SN627_0327_AC2ND3ACXX_2_ATGTCA	NA	NA	NA	NA	NA	NA	NA	NA	NA	NA	NA	NA	NA	NA	NA	NA	NA	NA	NA	1539.75	20.1429	18.1485	93.0114	94.2457	0.870673	1.69425	5.44257	0.782395	0.314695	0.284397	7	0.906371	1.624	5.07333	0.775882	0.314695	0.284397	6	NA	NA	NA	NA	NA	NA	NA
TCGA-EB-A82B-01A-11R-A352-07	642ef20f-5d1f-48b3-b543-b03c88868707	48b96bbc-d36e-4f95-ae88-ea708d2d33ff	SKCM	642ef20f-5d1f-48b3-b543-b03c88868707-140312_UNC15-SN850_0357_AC3M7FACXX_6_CAGATC	858.171	21.7	20.5047	97.117	97.4428	0.797017	1.8352	6.26639	0.775457	0.40415	0.1777	10	0.856338	1.66636	5.29285	0.755227	0.423527	0.1777	7	211721	18.2244	18.938	93.8457	94.7455	0.712753	3.79399	44.4334	0.94328	0.151952	0.126817	205	0.727341	3.26477	26.1741	0.922542	0.160985	0.136361	89	NA	NA	NA	NA	NA	NA	NA
TCGA-EB-A82C-01A-11R-A352-07	7d4587db-0b8e-4b62-957a-10391dd9adb7	c7225e98-bd83-450e-9792-6983424f5726	SKCM	7d4587db-0b8e-4b62-957a-10391dd9adb7-140312_UNC15-SN850_0357_AC3M7FACXX_6_ATGTCA	NA	NA	NA	NA	NA	NA	NA	NA	NA	NA	NA	NA	NA	NA	NA	NA	NA	NA	NA	611.474	23.5	22.3418	92.77	90.2606	0.51169	0.354676	1.42572	0.201917	0.886059	0.113941	2	0.51169	0.354676	1.42572	0.201917	0.886059	0.113941	2	NA	NA	NA	NA	NA	NA	NA
TCGA-EB-A85I-01A-11R-A352-07	4a434288-bf89-4a14-bbef-170fa540bc50	a5a16312-b50a-4c79-a2b9-530bd0fc66b1	SKCM	4a434288-bf89-4a14-bbef-170fa540bc50-140312_UNC15-SN850_0357_AC3M7FACXX_6_TGACCA	NA	NA	NA	NA	NA	NA	NA	NA	NA	NA	NA	NA	NA	NA	NA	NA	NA	NA	NA	1689.96	24.6667	25.833	94.8967	95.8469	0.274697	0.301786	1.35227	0.133043	0.929732	0.0417495	3	0.274697	0.301786	1.35227	0.133043	0.929732	0.0417495	3	NA	NA	NA	NA	NA	NA	NA
TCGA-EB-A85J-01A-12R-A352-07	ffb8b781-f547-496e-8ea9-eba6debc197a	5c49d176-0f55-4312-91f9-32457304966e	SKCM	ffb8b781-f547-496e-8ea9-eba6debc197a-140312_UNC15-SN850_0357_AC3M7FACXX_7_CTTGTA	NA	NA	NA	NA	NA	NA	NA	NA	NA	NA	NA	NA	NA	NA	NA	NA	NA	NA	NA	41238.2	18.5385	18.1682	95.1	96.2863	0.641335	2.08953	8.08113	0.795524	0.341236	0.271643	26	0.631379	1.89144	6.62893	0.763226	0.341236	0.328848	20	360.972	13	13	95.78	95.78	NA	0
TCGA-EB-A97M-01A-11R-A38C-07	9366d4df-948e-4645-9659-c3aa047aa0e7	bae5b50b-e671-4df9-92e9-aad3cfe8a26e	SKCM	9366d4df-948e-4645-9659-c3aa047aa0e7-140516_UNC12-SN629_0369_AC4GGKACXX_7_TAGCTT	NA	NA	NA	NA	NA	NA	NA	NA	NA	NA	NA	NA	NA	NA	NA	NA	NA	NA	NA	6609.38	17.5	18.6426	96.28	95.8755	0.856606	1.18751	3.2789	0.658762	0.444024	0.344024	4	0.856606	1.18751	3.2789	0.658762	0.444024	0.344024	4	NA	NA	NA	NA	NA	NA	NA
TCGA-EE-A17X-06A-11R-A18S-07	9bb20dd0-1e4e-4705-a4e1-58fca15ea497	99301c38-4cf4-4c9d-ba8c-3d56c066db9c	SKCM	9bb20dd0-1e4e-4705-a4e1-58fca15ea497-120118_UNC12-SN629_0179_AC0C6CACXX_7_TTAGGC	NA	NA	NA	NA	NA	NA	NA	NA	NA	NA	NA	NA	NA	NA	NA	NA	NA	NA	NA	1005.08	17.5	17.8914	92.4	91.8844	0.990958	0.68688	1.9875	0.493746	0.555921	0.444079	2	0.990958	0.68688	1.9875	0.493746	0.555921	0.444079	2	NA	NA	NA	NA	NA	NA	NA
TCGA-EE-A17Y-06A-11R-A18T-07	caeedb52-88ef-4953-94c0-e8f47bc9e8c4	55f50a7b-5448-4895-81bc-578eecbd7680	SKCM	caeedb52-88ef-4953-94c0-e8f47bc9e8c4-120221_UNC14-SN744_0207_AC0F2EACXX_5_CAGATC	NA	NA	NA	NA	NA	NA	NA	NA	NA	NA	NA	NA	NA	NA	NA	NA	NA	NA	NA	278.12	16	16.3978	88.375	88.4009	0.88265	0.611806	1.84376	0.42089	0.698885	0.301115	2	0.88265	0.611806	1.84376	0.42089	0.698885	0.301115	2	NA	NA	NA	NA	NA	NA	NA
TCGA-EE-A17Z-06A-11R-A18S-07	f2faed33-98d6-47ae-b3ab-61473b386acb	03b25565-6f06-410e-96fc-cd7cfc59ba72	SKCM	f2faed33-98d6-47ae-b3ab-61473b386acb-120118_UNC12-SN629_0179_AC0C6CACXX_7_GATCAG	NA	NA	NA	NA	NA	NA	NA	NA	NA	NA	NA	NA	NA	NA	NA	NA	NA	NA	NA	NA	NA	NA	NA	NA	NA	NA	NA	NA	NA	NA	NA	NA	NA	NA	NA	NA	NA	NA	NA	NA	NA	NA	NA	NA	NA
TCGA-EE-A180-06A-11R-A21D-07	33d3fd31-f03f-4e0f-9c84-2c5fa0a96a11	8f22fb80-0400-435e-8a3b-7500a7002963	SKCM	33d3fd31-f03f-4e0f-9c84-2c5fa0a96a11-120327_UNC10-SN254_0342_BC0LCYACXX_6_CAGATC	NA	NA	NA	NA	NA	NA	NA	NA	NA	NA	NA	NA	NA	NA	NA	NA	NA	NA	NA	NA	NA	NA	NA	NA	NA	NA	NA	NA	NA	NA	NA	NA	NA	NA	NA	NA	NA	NA	NA	NA	NA	NA	NA	NA	NA
TCGA-EE-A181-06A-11R-A18S-07	e5434fce-7745-46a0-8125-569f8da00e7a	eca521e3-f15c-4709-9a2d-ce6c34dcf342	SKCM	e5434fce-7745-46a0-8125-569f8da00e7a-111122_UNC15-SN850_0149_BC0588ACXX_3_ACTTGA	122.909	17	17	90.22	90.22	NA	0	1	0	1	NA	1	NA	0	1	0	1	NA	1	69985.3	16.6923	16.7844	96.6793	95.9111	0.870534	4.64651	104.221	0.98626	0.0357155	0.0338745	208	0.906922	4.36428	78.5927	0.983022	0.0412613	0.0360114	123	14122.3	16.0444	15.3894	99.2869	99.4175	0.768669	2.92606
TCGA-EE-A182-06A-11R-A18T-07	9db0b439-00ab-4c2d-a4cd-b012694c8227	9d2aecbe-06b9-43ae-bdcc-ae8c9f896fdb	SKCM	9db0b439-00ab-4c2d-a4cd-b012694c8227-120118_UNC15-SN850_0163_AD0J87ACXX_8_TAGCTT	1914.5	17.75	16.9293	87.4225	89.754	0.76807	1.06477	2.90018	0.559965	0.625524	0.159377	4	0.76807	1.06477	2.90018	0.559965	0.625524	0.159377	4	9782.42	18.8235	20.5969	93.6682	94.5608	0.787741	2.23184	9.31699	0.817491	0.385501	0.095333	17	0.796835	2.10289	8.18984	0.808803	0.385501	0.122508	14	NA	NA	NA	NA	NA	NA	NA
TCGA-EE-A183-06A-11R-A18S-07	5be4dff4-fbaa-4a44-92de-66329e7afac2	5ad500eb-a97f-42cf-b0cd-1d5ce0f3584d	SKCM	5be4dff4-fbaa-4a44-92de-66329e7afac2-120118_UNC12-SN629_0179_AC0C6CACXX_8_ATCACG	1605.22	16.5	17.5974	92.8567	91.6315	0.903592	2.24534	9.44364	0.8726	0.215704	0.177262	12	0.96923	1.88603	6.59317	0.840545	0.215704	0.18367	7	514.905	16.25	16.3071	86.935	87.3647	0.94637	1.31195	3.7134	0.714489	0.374723	0.2949	4	0.94637	1.31195	3.7134	0.714489	0.374723	0.2949	4	336.8	19	19	93.61	93.61	NA	0
TCGA-EE-A184-06A-11R-A18S-07	6d7f5372-50a0-49a1-a758-5227b4f003dc	2555472f-e74d-48c6-8c4f-54a52767e8c4	SKCM	6d7f5372-50a0-49a1-a758-5227b4f003dc-111122_UNC15-SN850_0149_BC0588ACXX_4_TAGCTT	2012.06	14.9	15.4216	93.892	92.6326	0.810242	1.86565	6.46014	0.805323	0.332823	0.190109	10	0.766374	1.37316	3.94779	0.707355	0.366855	0.342596	6	25031.2	15.9286	16.8972	96.8482	95.984	0.642904	2.14229	8.51892	0.770797	0.442511	0.125687	28	0.690921	2.10353	8.19501	0.770362	0.442511	0.125687	21	23227.5	14	14	99.0257	99.0989	0.215997	0.420311
TCGA-EE-A185-06A-11R-A18S-07	b023c10d-de06-4186-8dce-8da3894ccdca	94bd0768-0e03-4387-b980-09b5efcd21c5	SKCM	b023c10d-de06-4186-8dce-8da3894ccdca-111122_UNC15-SN850_0149_BC0588ACXX_4_GATCAG	NA	NA	NA	NA	NA	NA	NA	NA	NA	NA	NA	NA	NA	NA	NA	NA	NA	NA	NA	321.716	18.25	18.6989	90.935	91.3247	0.990901	1.37368	3.94986	0.74364	0.307692	0.263736	4	0.990901	1.37368	3.94986	0.74364	0.307692	0.263736	4	NA	NA	NA	NA	NA	NA	NA
TCGA-EE-A20B-06A-11R-A18U-07	7e7bf63a-fbab-483d-832e-da72f215d46f	bbcc0f70-85ae-409a-a108-1cabc60d2532	SKCM	7e7bf63a-fbab-483d-832e-da72f215d46f-120220_UNC9-SN296_0273_BD0MN6ACXX_4_CGATGT	362.852	19	18.47	93.115	94.6175	0.786647	0.545262	1.72506	0.359563	0.764988	0.235012	2	0.786647	0.545262	1.72506	0.359563	0.764988	0.235012	2	34688.3	16.3864	14.632	92.9282	93.3812	0.669361	2.53299	12.5911	0.864648	0.23511	0.189665	44	0.657294	2.33691	10.3492	0.83139	0.304202	0.189665	35	NA	NA	NA	NA	NA	NA	NA
TCGA-EE-A20C-06A-11R-A18S-07	9db4f783-93a9-40fa-8de0-88c2e0cb0d2a	f3fe7192-c115-4c74-927b-b3d824995205	SKCM	9db4f783-93a9-40fa-8de0-88c2e0cb0d2a-120118_UNC12-SN629_0179_AC0C6CACXX_8_ACTTGA	NA	NA	NA	NA	NA	NA	NA	NA	NA	NA	NA	NA	NA	NA	NA	NA	NA	NA	NA	NA	NA	NA	NA	NA	NA	NA	NA	NA	NA	NA	NA	NA	NA	NA	NA	NA	NA	NA	NA	NA	NA	NA	NA	NA	NA
TCGA-EE-A20F-06A-21R-A18S-07	042e2ec2-5072-4190-bfb1-ab0b156ad4af	9d120ffc-51e1-496f-87e0-298ec882691b	SKCM	042e2ec2-5072-4190-bfb1-ab0b156ad4af-120118_UNC15-SN850_0163_AD0J87ACXX_1_ACTTGA	1243.48	16.75	19.4298	89.725	86.8887	0.655669	0.90895	2.48172	0.472849	0.701992	0.128958	4	0.740048	0.813026	2.25472	0.462	0.701992	0.16905	3	80301.8	17.4648	16.711	95.5063	91.3573	0.612895	2.61258	13.6341	0.787678	0.44254	0.0823016	71	0.641925	2.41441	11.1832	0.781662	0.44325	0.090013	43	1498.82	19	18.6566	91.495	92.4664	0.83604	1.159
TCGA-EE-A20H-06A-11R-A18S-07	aad1b700-7a27-4193-a67b-cb6abbef1b53	b971d290-ba1f-46f3-8605-31e1502adf69	SKCM	aad1b700-7a27-4193-a67b-cb6abbef1b53-120118_UNC15-SN850_0163_AD0J87ACXX_1_GATCAG	NA	NA	NA	NA	NA	NA	NA	NA	NA	NA	NA	NA	NA	NA	NA	NA	NA	NA	NA	NA	NA	NA	NA	NA	NA	NA	NA	NA	NA	NA	NA	NA	NA	NA	NA	NA	NA	NA	NA	NA	NA	NA	NA	NA	NA
TCGA-EE-A20I-06A-11R-A18U-07	752777ac-060c-406a-bb34-292fd51e7209	cfc5a7ec-fd48-4944-85f8-40f755b4111e	SKCM	752777ac-060c-406a-bb34-292fd51e7209-120221_UNC14-SN744_0207_AC0F2EACXX_6_TAGCTT	NA	NA	NA	NA	NA	NA	NA	NA	NA	NA	NA	NA	NA	NA	NA	NA	NA	NA	NA	39476.6	17.0909	16.1055	94.1336	95.767	0.631621	1.95237	7.04534	0.763727	0.431785	0.127801	22	0.648535	1.94284	6.97852	0.76259	0.4331	0.127801	20	NA	NA	NA	NA	NA	NA	NA
TCGA-EE-A29A-06A-12R-A18U-07	bed6114c-ce37-4ebe-a22a-2fac3ad84d50	471aa847-0e7e-4ec5-bb50-c0df66260f91	SKCM	bed6114c-ce37-4ebe-a22a-2fac3ad84d50-120220_UNC9-SN296_0273_BD0MN6ACXX_5_ACTTGA	NA	NA	NA	NA	NA	NA	NA	NA	NA	NA	NA	NA	NA	NA	NA	NA	NA	NA	NA	NA	NA	NA	NA	NA	NA	NA	NA	NA	NA	NA	NA	NA	NA	NA	NA	NA	NA	NA	NA	NA	NA	NA	NA	NA	NA
TCGA-EE-A29B-06A-11R-A18U-07	76d6e27b-7069-49d8-990a-ef4a282a2efb	9c14ff17-4b8d-448f-acac-6dd769559bed	SKCM	76d6e27b-7069-49d8-990a-ef4a282a2efb-120220_UNC9-SN296_0273_BD0MN6ACXX_5_CTTGTA	NA	NA	NA	NA	NA	NA	NA	NA	NA	NA	NA	NA	NA	NA	NA	NA	NA	NA	NA	NA	NA	NA	NA	NA	NA	NA	NA	NA	NA	NA	NA	NA	NA	NA	NA	NA	NA	NA	NA	NA	NA	NA	NA	NA	NA
TCGA-EE-A29C-06A-21R-A18S-07	b6bd7fb6-7a0f-4d15-925c-8f6f41533a48	a0c48f0a-061f-4b7c-9d70-b90aca5afd5d	SKCM	b6bd7fb6-7a0f-4d15-925c-8f6f41533a48-120127_UNC12-SN629_0182_BD0JFVACXX_2_GGCTAC	NA	NA	NA	NA	NA	NA	NA	NA	NA	NA	NA	NA	NA	NA	NA	NA	NA	NA	NA	2324.53	18	15.9755	89.3471	89.3146	0.682456	1.328	3.77348	0.608534	0.594505	0.138865	7	0.682456	1.328	3.77348	0.608534	0.594505	0.138865	7	NA	NA	NA	NA	NA	NA	NA
TCGA-EE-A29D-06A-11R-A18T-07	2d28468f-d946-4d50-bea2-8019dd5fb862	5c8adf9a-05bc-4690-a057-4638de231d93	SKCM	2d28468f-d946-4d50-bea2-8019dd5fb862-120201_UNC11-SN627_0182_BD0MYMACXX_4_TTAGGC	295.557	15.5	15.4628	91.53	91.2587	0.99601	0.690381	1.99448	0.497237	0.53717	0.46283	2	0.99601	0.690381	1.99448	0.497237	0.53717	0.46283	2	3352.13	16.8889	16.0972	91.9967	92.725	0.943495	2.07307	7.9492	0.861097	0.220446	0.169541	9	0.910904	1.89417	6.64704	0.827506	0.261674	0.220446	8	103.54	15	15	87.88	87.88	NA	0
TCGA-EE-A29E-06A-11R-A18T-07	7baa21dd-9a0f-4230-9b5b-f0e2aff573f8	24e9d763-4fc9-4806-90f7-6aeda279bc8f	SKCM	7baa21dd-9a0f-4230-9b5b-f0e2aff573f8-120127_UNC12-SN629_0182_BD0JFVACXX_3_TTAGGC	NA	NA	NA	NA	NA	NA	NA	NA	NA	NA	NA	NA	NA	NA	NA	NA	NA	NA	NA	NA	NA	NA	NA	NA	NA	NA	NA	NA	NA	NA	NA	NA	NA	NA	NA	NA	NA	NA	NA	NA	NA	NA	NA	NA	NA
TCGA-EE-A29G-06A-12R-A18T-07	b768ab02-981d-416f-a742-05b3665955c0	4806a9ce-6f74-4e66-a45f-1ff7bbe39aea	SKCM	b768ab02-981d-416f-a742-05b3665955c0-120124_UNC16-SN851_0124_BC0C16ACXX_1_GGCTAC	NA	NA	NA	NA	NA	NA	NA	NA	NA	NA	NA	NA	NA	NA	NA	NA	NA	NA	NA	6497.31	16.3667	16.1238	97.0667	97.147	0.892131	3.03432	20.7867	0.935435	0.145066	0.122571	30	0.912117	2.93599	18.8402	0.932143	0.145066	0.122571	25	NA	NA	NA	NA	NA	NA	NA
TCGA-EE-A29H-06A-12R-A18S-07	0371793d-d500-4e4f-8393-e042eccacfbc	3663854a-fbf6-4734-a968-7a64b16b63b0	SKCM	0371793d-d500-4e4f-8393-e042eccacfbc-111122_UNC15-SN850_0149_BC0588ACXX_5_ATCACG	576.262	19.4	18.7093	90.126	89.0001	0.962362	1.54886	4.70611	0.78035	0.246324	0.232888	5	0.962362	1.54886	4.70611	0.78035	0.246324	0.232888	5	19247.3	18.7551	18.5081	97.3108	96.9465	0.753067	2.9308	18.7427	0.910523	0.179809	0.158564	49	0.75606	2.73007	15.334	0.89105	0.210682	0.183516	37	NA	NA	NA	NA	NA	NA	NA
TCGA-EE-A29L-06A-12R-A18S-07	9815ef4e-00e8-4563-bf67-e500becdbeab	ee9fecf0-91d4-4ff2-8a88-a59f6208d4b2	SKCM	9815ef4e-00e8-4563-bf67-e500becdbeab-111212_UNC15-SN850_0155_AD087AACXX_1_ATCACG	109.607	16	16	100	100	NA	0	1	0	1	NA	1	NA	0	1	0	1	NA	1	704.615	17.75	18.1667	96.255	96.4361	0.940049	1.30318	3.681	0.708995	0.398413	0.274603	4	0.940049	1.30318	3.681	0.708995	0.398413	0.274603	4	NA	NA	NA	NA	NA	NA	NA
TCGA-EE-A29M-06A-11R-A18T-07	bf8cc761-2d6f-444a-9c3c-9db11428d433	8fba87be-9062-49e8-ab5d-95b4c4c6a721	SKCM	bf8cc761-2d6f-444a-9c3c-9db11428d433-120201_UNC11-SN627_0182_BD0MYMACXX_5_CAGATC	NA	NA	NA	NA	NA	NA	NA	NA	NA	NA	NA	NA	NA	NA	NA	NA	NA	NA	NA	806.595	20.5	20.1584	96.515	96.4805	0.958216	1.32837	3.77488	0.723854	0.346272	0.270574	4	0.958216	1.32837	3.77488	0.723854	0.346272	0.270574	4	NA	NA	NA	NA	NA	NA	NA
TCGA-EE-A29N-06A-12R-A18S-07	e9452c45-0d2c-4f57-bccb-444667d592fc	7390099e-8926-4ae0-a0cd-99426c6e4a1d	SKCM	e9452c45-0d2c-4f57-bccb-444667d592fc-120118_UNC15-SN850_0163_AD0J87ACXX_2_TAGCTT	511.153	18.2857	16.9299	92.2214	90.2226	0.671052	1.30581	3.69066	0.675424	0.460302	0.24253	7	0.828494	1.14854	3.15357	0.65422	0.460302	0.284295	4	1518.8	19.4	20.0669	92.594	91.9654	0.854865	2.56095	12.9481	0.896268	0.222308	0.122532	20	0.940033	1.95474	7.06212	0.841429	0.240609	0.222308	8	4991.57	18.6	18.9318	93.132	93.3635	0.496634	1.14354
TCGA-EE-A29P-06A-11R-A18T-07	0af880d9-6815-425d-aea0-0b1e94a632fc	1b970dc3-8bf2-4b48-8631-d9d61b05535d	SKCM	0af880d9-6815-425d-aea0-0b1e94a632fc-120201_UNC11-SN627_0182_BD0MYMACXX_6_CAGATC	96.2662	23	23	91.41	91.41	NA	0	1	0	1	NA	1	NA	0	1	0	1	NA	1	33921.9	18.0615	17.6329	93.4838	96.6454	0.589684	2.46157	11.7232	0.75203	0.48167	0.0766702	65	0.58979	2.29536	9.92797	0.730125	0.503104	0.0810512	49	NA	NA	NA	NA	NA	NA	NA
TCGA-EE-A29Q-06A-11R-A18T-07	2ccb9741-5710-4fe6-aaee-9fc88a69c75a	50c829d7-c1cb-46dc-a17d-f2cdcfa8e8a6	SKCM	2ccb9741-5710-4fe6-aaee-9fc88a69c75a-120201_UNC11-SN627_0182_BD0MYMACXX_5_GCCAAT	NA	NA	NA	NA	NA	NA	NA	NA	NA	NA	NA	NA	NA	NA	NA	NA	NA	NA	NA	1841.32	18.7143	17.2102	89.3271	88.5491	0.942919	1.83484	6.2641	0.825213	0.234259	0.223148	7	0.942919	1.83484	6.2641	0.825213	0.234259	0.223148	7	NA	NA	NA	NA	NA	NA	NA
TCGA-EE-A29R-06A-11R-A18T-07	37a111cf-21c1-4b8a-a7e0-47e6eb2ca2c7	3bf6d735-504c-4d36-be6d-ca1a7aaad836	SKCM	37a111cf-21c1-4b8a-a7e0-47e6eb2ca2c7-120127_UNC12-SN629_0182_BD0JFVACXX_2_CAGATC	NA	NA	NA	NA	NA	NA	NA	NA	NA	NA	NA	NA	NA	NA	NA	NA	NA	NA	NA	NA	NA	NA	NA	NA	NA	NA	NA	NA	NA	NA	NA	NA	NA	NA	NA	NA	NA	NA	NA	NA	NA	NA	NA	NA	NA
TCGA-EE-A29S-06A-11R-A18T-07	85b46498-9f12-4d71-aac2-75875e4c960e	5d3aa73e-ce8e-409d-ab73-bdc6d28bb956	SKCM	85b46498-9f12-4d71-aac2-75875e4c960e-120127_UNC12-SN629_0182_BD0JFVACXX_3_CAGATC	NA	NA	NA	NA	NA	NA	NA	NA	NA	NA	NA	NA	NA	NA	NA	NA	NA	NA	NA	1483.61	22.5	22.1755	90.15	91.5973	0.670142	0.464507	1.59123	0.289405	0.824496	0.175504	2	0.670142	0.464507	1.59123	0.289405	0.824496	0.175504	2	NA	NA	NA	NA	NA	NA	NA
TCGA-EE-A29T-06A-11R-A18T-07	89700c74-45f6-4289-9877-c672ba7cbae0	73290cd5-d727-49d3-b054-c40e15ebc233	SKCM	89700c74-45f6-4289-9877-c672ba7cbae0-120127_UNC12-SN629_0182_BD0JFVACXX_4_ATCACG	1353.01	16.8333	15.2028	94.615	93	0.864669	1.54928	4.70807	0.752494	0.347359	0.30254	6	0.683685	1.10035	3.00521	0.542315	0.649899	0.1148	5	149157	16.7551	16.648	97.7922	97.3527	0.786523	3.92509	50.6575	0.963633	0.109034	0.0850437	147	0.827487	3.56156	35.218	0.952918	0.136735	0.0932723	74	NA	NA	NA	NA	NA	NA	NA
TCGA-EE-A29V-06A-12R-A18S-07	95c39be6-5e81-461c-885a-b8ac6cc4a7a5	0fce8c31-15af-4558-9c50-341d447ff5d5	SKCM	95c39be6-5e81-461c-885a-b8ac6cc4a7a5-120118_UNC15-SN850_0163_AD0J87ACXX_3_TTAGGC	NA	NA	NA	NA	NA	NA	NA	NA	NA	NA	NA	NA	NA	NA	NA	NA	NA	NA	NA	948.921	17.25	17.0058	92.53	92.39	0.883172	1.22434	3.40191	0.668237	0.471698	0.268505	4	0.883172	1.22434	3.40191	0.668237	0.471698	0.268505	4	NA	NA	NA	NA	NA	NA	NA
TCGA-EE-A29W-06A-11R-A18U-07	2b671188-5ac3-4163-90ac-2295a67e990c	3bdd32fc-608b-4559-b219-bd57548cb29a	SKCM	2b671188-5ac3-4163-90ac-2295a67e990c-120220_UNC9-SN296_0273_BD0MN6ACXX_6_CTTGTA	NA	NA	NA	NA	NA	NA	NA	NA	NA	NA	NA	NA	NA	NA	NA	NA	NA	NA	NA	NA	NA	NA	NA	NA	NA	NA	NA	NA	NA	NA	NA	NA	NA	NA	NA	NA	NA	NA	NA	NA	NA	NA	NA	NA	NA
TCGA-EE-A29X-06A-11R-A18T-07	66062349-93f4-4de7-ab72-87a825947b2a	58d8d333-2db3-414a-b8c6-22e28d79403b	SKCM	66062349-93f4-4de7-ab72-87a825947b2a-120124_UNC16-SN851_0124_BC0C16ACXX_2_GGCTAC	7662.59	17.8333	17.682	92.4272	93.8776	0.726522	2.09992	8.16551	0.78101	0.420133	0.164688	18	0.685981	1.94353	6.98336	0.740079	0.468845	0.164688	17	22610.3	18.0312	17.1008	88.2689	87.0047	0.868166	3.6106	36.9882	0.953284	0.142091	0.0943913	64	0.866162	3.54636	34.687	0.949121	0.155763	0.0943913	60	NA	NA	NA	NA	NA	NA	NA
TCGA-EE-A2A0-06A-11R-A18T-07	3b2441cf-0bb2-4f74-9e0f-0f55feb209a9	8f259997-f80c-4516-a7e6-f8c888f008d4	SKCM	3b2441cf-0bb2-4f74-9e0f-0f55feb209a9-120127_UNC12-SN629_0182_BD0JFVACXX_4_TAGCTT	1117.04	16	16.0545	90.9314	90.559	0.939478	1.82814	6.2223	0.817811	0.315494	0.151282	7	0.939478	1.82814	6.2223	0.817811	0.315494	0.151282	7	77274.4	18.625	18.8897	90.7884	90.3309	0.853525	4.14133	62.8863	0.975281	0.0734498	0.0543314	128	0.867307	3.92178	50.4901	0.969563	0.0881799	0.0622936	92	NA	NA	NA	NA	NA	NA	NA
TCGA-EE-A2A1-06A-11R-A18T-07	4b89fee7-bbf1-48d4-a180-3d31c9733828	1e140ddc-259f-4f83-b5c5-5cbeb3617fb3	SKCM	4b89fee7-bbf1-48d4-a180-3d31c9733828-120201_UNC11-SN627_0182_BD0MYMACXX_6_TAGCTT	13005.8	17.1579	17.3029	90.5247	89.5251	0.713483	2.10081	8.17277	0.770598	0.448301	0.099033	19	0.733101	2.07703	7.98073	0.770224	0.448301	0.099033	17	239347	17.6376	18.8198	96.6327	96.7323	0.700519	3.50536	33.2933	0.944645	0.118891	0.0976744	149	0.733069	3.10389	22.2846	0.929633	0.135747	0.134378	69	4612.49	15.5714	16.5451	99.31	99.4718	0.654661	1.27391
TCGA-EE-A2A2-06A-11R-A18T-07	d4b7d854-60fb-49f1-bcdd-faefe9b0f1a2	cc38cfd7-4ade-4834-812d-109d152a45b8	SKCM	d4b7d854-60fb-49f1-bcdd-faefe9b0f1a2-120201_UNC11-SN627_0182_BD0MYMACXX_7_TAGCTT	NA	NA	NA	NA	NA	NA	NA	NA	NA	NA	NA	NA	NA	NA	NA	NA	NA	NA	NA	50388.7	17.686	17.2397	97.1922	96.9237	0.811692	3.61556	37.172	0.943388	0.193298	0.0556109	86	0.820522	3.30289	27.1911	0.926977	0.225265	0.0569735	56	NA	NA	NA	NA	NA	NA	NA
TCGA-EE-A2A5-06A-11R-A18T-07	09ef8a58-9845-4baf-8c7e-b974eddeecc3	8d88024d-1da6-4497-be57-1bb50e18a9a4	SKCM	09ef8a58-9845-4baf-8c7e-b974eddeecc3-120124_UNC16-SN851_0123_AC0FDJACXX_5_CTTGTA	NA	NA	NA	NA	NA	NA	NA	NA	NA	NA	NA	NA	NA	NA	NA	NA	NA	NA	NA	1296.32	16	18.2962	88.88	88.5021	0.898412	0.987006	2.68319	0.595799	0.52468	0.326956	3	0.898412	0.987006	2.68319	0.595799	0.52468	0.326956	3	NA	NA	NA	NA	NA	NA	NA
TCGA-EE-A2A6-06A-11R-A18T-07	e5de2609-92ab-4a53-9524-4d08fccc6d6e	5f92f983-1ec8-4bfd-b477-8118d31a02e3	SKCM	e5de2609-92ab-4a53-9524-4d08fccc6d6e-120127_UNC12-SN629_0182_BD0JFVACXX_5_TAGCTT	887.854	19.2	22.6464	97.996	98.2884	0.681	1.09603	2.99226	0.589615	0.567762	0.276122	5	0.681	1.09603	2.99226	0.589615	0.567762	0.276122	5	36107.8	18.1364	18.0819	95.9359	95.0851	0.740588	3.10281	22.2604	0.910569	0.184252	0.158059	66	0.770736	2.88076	17.8278	0.899794	0.20882	0.158059	42	1653.39	20.2857	19.9919	97.6671	96.4313	0.810837	1.57782
TCGA-EE-A2GB-06A-11R-A18T-07	4e793a40-a6af-4e98-abbc-c25bd439fe19	9d3eb977-6020-42db-804b-a1139511a979	SKCM	4e793a40-a6af-4e98-abbc-c25bd439fe19-120221_UNC14-SN744_0207_AC0F2EACXX_6_CGATGT	4687.53	20	15.6767	91.0067	96.0334	0.662764	1.18751	3.27892	0.56848	0.625435	0.162919	6	0.699568	1.12591	3.08302	0.564442	0.625435	0.162919	5	17074.5	17.4444	19.4042	97.475	92.62	0.54881	1.58626	4.88546	0.685511	0.436615	0.343734	18	0.587971	1.55169	4.71943	0.684982	0.436615	0.343734	14	144.62	12	12	100	100	NA	0
TCGA-EE-A2GC-06A-11R-A18T-07	1ac2b7e5-d3d0-4a9e-8356-7d2b09b6b543	5ac1f533-a9f3-4a5e-a25f-4b04ffcf50b6	SKCM	1ac2b7e5-d3d0-4a9e-8356-7d2b09b6b543-120201_UNC11-SN627_0182_BD0MYMACXX_8_GGCTAC	242.331	21.25	21.2204	96.2025	96.0138	0.62667	0.868749	2.38393	0.472462	0.688989	0.22043	4	0.760952	0.527452	1.69461	0.343681	0.77957	0.22043	2	23040.1	17.0826	16.6112	98.8138	98.9094	0.689282	3.30565	27.2664	0.937394	0.1106	0.108481	121	0.778171	2.85088	17.303	0.920393	0.126553	0.111773	39	160.632	19.75	20.1103	99.595	99.5228	0.763622	1.58791
TCGA-EE-A2GD-06A-11R-A18T-07	23d9ac09-61d1-4111-87bb-cb9ae61b0cb6	55cb57c2-be44-4e16-94b7-aa58307b12b8	SKCM	23d9ac09-61d1-4111-87bb-cb9ae61b0cb6-120201_UNC11-SN627_0182_BD0MYMACXX_7_GGCTAC	6733.94	16.1111	15.2535	88.2722	88.0339	0.745203	1.63738	5.14167	0.70134	0.505537	0.158372	9	0.745203	1.63738	5.14167	0.70134	0.505537	0.158372	9	32442.4	17.2143	17.5199	88.3214	88.9609	0.904402	3.38036	29.3812	0.955821	0.0971027	0.0884478	42	0.904411	3.24097	25.5586	0.949775	0.0971027	0.0890595	36	NA	NA	NA	NA	NA	NA	NA
TCGA-EE-A2GE-06A-11R-A18T-07	22df89d5-172a-4d29-ad03-45efff237ed1	fec63465-f926-4fce-a88a-898cac637305	SKCM	22df89d5-172a-4d29-ad03-45efff237ed1-120124_UNC16-SN851_0123_AC0FDJACXX_6_CTTGTA	1236.82	20.6667	21.8843	86.7967	86.6615	0.75425	0.828628	2.29018	0.472119	0.693401	0.159391	3	0.75425	0.828628	2.29018	0.472119	0.693401	0.159391	3	539541	16.502	16.152	95.7674	95.4278	0.661716	3.66153	38.9209	0.933303	0.164609	0.164609	253	0.660553	2.76749	15.9186	0.824124	0.400293	0.0634588	66	NA	NA	NA	NA	NA	NA	NA
TCGA-EE-A2GH-06A-11R-A18T-07	f8d1595e-f604-492e-9ea5-9b48a1cbc7be	e5c59c1c-fc25-47b1-b8ab-dc0767a4ebe7	SKCM	f8d1595e-f604-492e-9ea5-9b48a1cbc7be-120127_UNC12-SN629_0182_BD0JFVACXX_5_GGCTAC	363.829	16.5	15.4524	85.825	86.3928	0.869336	0.602578	1.82682	0.4122	0.709524	0.290476	2	0.869336	0.602578	1.82682	0.4122	0.709524	0.290476	2	73340.6	18.2661	18.2621	96.2321	97.5449	0.677249	3.17721	23.9798	0.869257	0.339045	0.0659027	109	0.704884	2.92043	18.5492	0.858704	0.34723	0.079699	63	929.79	15	15	99.57	99.57	NA	0
TCGA-EE-A2GI-06A-11R-A18T-07	8ebc2e2c-8c0e-4a5d-963b-9d7ec8432dcd	5f75a7a1-a36b-4ddc-adc7-7de26854f0b2	SKCM	8ebc2e2c-8c0e-4a5d-963b-9d7ec8432dcd-120221_UNC14-SN744_0207_AC0F2EACXX_7_CTTGTA	880.862	17	15.7135	96.96	92.7216	0.519334	0.719949	2.05433	0.382488	0.769115	0.12895	4	0.63468	0.697267	2.00826	0.381093	0.769115	0.134362	3	130492	18.5106	18.1345	98.8048	97.3663	0.667149	3.30156	27.1549	0.902152	0.275371	0.0802368	141	0.684813	2.82631	16.8831	0.880561	0.275371	0.140207	62	5344.12	16.5	18.6574	98.959	98.8731	0.579273	1.33383
TCGA-EE-A2GJ-06A-11R-A18U-07	3d8e463f-c934-430c-a268-a220537c661f	c0e841a4-6638-4e17-a3eb-5a900f616b0c	SKCM	3d8e463f-c934-430c-a268-a220537c661f-120220_UNC9-SN296_0273_BD0MN6ACXX_6_TTAGGC	NA	NA	NA	NA	NA	NA	NA	NA	NA	NA	NA	NA	NA	NA	NA	NA	NA	NA	NA	1088.65	18	18	94.14	94.14	NA	0	1	0	1	NA	1	NA	0	1	0	1	NA	1	NA	NA	NA	NA	NA	NA	NA
TCGA-EE-A2GK-06A-11R-A18S-07	9f3c50fe-db53-48cb-a01b-a69bc80c65b9	a9b12880-decd-416f-805b-f3484cd25e8a	SKCM	9f3c50fe-db53-48cb-a01b-a69bc80c65b9-111122_UNC15-SN850_0149_BC0588ACXX_5_GGCTAC	138.059	21.5	19.5404	91.905	89.881	0.760262	0.526974	1.6938	0.343258	0.779948	0.220052	2	0.760262	0.526974	1.6938	0.343258	0.779948	0.220052	2	2599.01	18.7647	18.8964	92.8265	92.5244	0.936543	2.65343	14.2026	0.918795	0.161474	0.107649	17	0.955238	2.58683	13.2876	0.915159	0.161474	0.107649	15	NA	NA	NA	NA	NA	NA	NA
TCGA-EE-A2GL-06A-11R-A18S-07	70bbc4c1-b2fb-4f5d-98b5-5c4ee66d3552	478d662b-3ca6-48ba-85ce-efd70fa86f92	SKCM	70bbc4c1-b2fb-4f5d-98b5-5c4ee66d3552-120118_UNC15-SN850_0163_AD0J87ACXX_4_ACTTGA	365.922	15.5	15.1211	97.825	97.1772	0.532654	0.369208	1.44659	0.212944	0.878851	0.121149	2	0.532654	0.369208	1.44659	0.212944	0.878851	0.121149	2	5795.8	16.913	16.5115	97.5591	97.9066	0.916764	2.87451	17.7167	0.930783	0.140732	0.132239	23	0.924826	2.56416	12.9898	0.90985	0.159582	0.140732	16	NA	NA	NA	NA	NA	NA	NA
TCGA-EE-A2GM-06B-11R-A18S-07	074e0cf5-8551-485c-82bc-e12a52558019	64995aa9-6bc3-4518-8694-4fa5a8d9b081	SKCM	074e0cf5-8551-485c-82bc-e12a52558019-120118_UNC15-SN850_0163_AD0J87ACXX_5_TTAGGC	319.406	22	22	90	90	NA	0	1	0	1	NA	1	NA	0	1	0	1	NA	1	NA	NA	NA	NA	NA	NA	NA	NA	NA	NA	NA	NA	NA	NA	NA	NA	NA	NA	NA	NA	NA	NA	NA	NA	NA	NA
TCGA-EE-A2GN-06A-11R-A18S-07	7832eb9b-0cc6-4210-b027-767be307c098	0f3ce1eb-6393-4c42-bd47-2cf67ba378ca	SKCM	7832eb9b-0cc6-4210-b027-767be307c098-120118_UNC15-SN850_0163_AD0J87ACXX_6_ACTTGA	1548.44	19.5	17.0828	88.765	88.3472	0.621439	0.430749	1.53841	0.261514	0.845316	0.154684	2	0.621439	0.430749	1.53841	0.261514	0.845316	0.154684	2	2889.98	19.1	19.4918	90.45	90.6757	0.976124	2.24761	9.46507	0.890569	0.129183	0.12607	10	0.976124	2.24761	9.46507	0.890569	0.129183	0.12607	10	118.073	26	26	90.91	90.91	NA	0
TCGA-EE-A2GO-06A-11R-A18S-07	5c4fd090-2674-404c-9cf2-aa71074f2a84	12fc6374-32ac-45d4-a09a-8fb71d69d953	SKCM	5c4fd090-2674-404c-9cf2-aa71074f2a84-120118_UNC15-SN850_0163_AD0J87ACXX_6_TAGCTT	NA	NA	NA	NA	NA	NA	NA	NA	NA	NA	NA	NA	NA	NA	NA	NA	NA	NA	NA	NA	NA	NA	NA	NA	NA	NA	NA	NA	NA	NA	NA	NA	NA	NA	NA	NA	NA	NA	NA	NA	NA	NA	NA	NA	NA
TCGA-EE-A2GP-06A-11R-A18S-07	9d52eebd-e0c6-4984-aa67-aea5d16b74e8	34049292-a4b9-4a3a-94be-e1febcecc848	SKCM	9d52eebd-e0c6-4984-aa67-aea5d16b74e8-120109_UNC11-SN627_0176_AC0CKDACXX_1_TTAGGC	108.989	18	18	93.24	93.24	NA	0	1	0	1	NA	1	NA	0	1	0	1	NA	1	237.715	17	16.5199	87.6833	87.7429	0.993499	1.09147	2.97865	0.661914	0.382671	0.33213	3	0.993499	1.09147	2.97865	0.661914	0.382671	0.33213	3	NA	NA	NA	NA	NA	NA	NA
TCGA-EE-A2GR-06A-11R-A18S-07	94c38512-d6dd-4d09-a2c7-5e58d3448d01	30fbb6c0-c79f-493b-b5c7-d8f820da9821	SKCM	94c38512-d6dd-4d09-a2c7-5e58d3448d01-120220_UNC9-SN296_0273_BD0MN6ACXX_7_GGCTAC	NA	NA	NA	NA	NA	NA	NA	NA	NA	NA	NA	NA	NA	NA	NA	NA	NA	NA	NA	170.176	22	22	94.29	94.29	NA	0	1	0	1	NA	1	NA	0	1	0	1	NA	1	NA	NA	NA	NA	NA	NA	NA
TCGA-EE-A2GS-06A-12R-A18S-07	5fc9f7a9-ce2f-4902-ab06-d67416ea398b	d4c47b15-bf2c-42b4-9aa1-c26f9ddbe4da	SKCM	5fc9f7a9-ce2f-4902-ab06-d67416ea398b-111212_UNC15-SN850_0155_AD087AACXX_1_TTAGGC	NA	NA	NA	NA	NA	NA	NA	NA	NA	NA	NA	NA	NA	NA	NA	NA	NA	NA	NA	1426.82	17.5	13.3596	95.59	93.8832	0.621	0.860888	2.36526	0.433278	0.736711	0.111296	4	0.621	0.860888	2.36526	0.433278	0.736711	0.111296	4	317.597	12	12	92.08	92.08	NA	0
TCGA-EE-A2GT-06A-12R-A18S-07	1a7e9b2d-c4e6-4372-9b95-a509a30f0d26	32cf555c-9de8-4de4-ba4a-a729ac88e8ba	SKCM	1a7e9b2d-c4e6-4372-9b95-a509a30f0d26-120109_UNC11-SN627_0176_AC0CKDACXX_2_ATCACG	1425.71	19.1765	19.4399	93.5435	92.5653	0.951144	2.6948	14.8025	0.925789	0.111669	0.105182	17	0.878107	2.18201	8.86415	0.853193	0.293961	0.152	12	4178.92	17.4	17.9307	95.7806	94.1825	0.884556	3.1449	23.2174	0.939974	0.156135	0.0851662	35	0.922781	3.04134	20.9332	0.937349	0.156135	0.0879781	27	613.522	13	13	94.51	94.51	NA	0
TCGA-EE-A2GU-06A-11R-A18T-07	3434aed5-8df9-4228-920a-85dcf639d172	284fadfc-0c63-44ef-a464-0a62f1173e6b	SKCM	3434aed5-8df9-4228-920a-85dcf639d172-120221_UNC14-SN744_0207_AC0F2EACXX_7_CGATGT	NA	NA	NA	NA	NA	NA	NA	NA	NA	NA	NA	NA	NA	NA	NA	NA	NA	NA	NA	45168.2	17.6988	18.4111	97.1988	95.2751	0.777735	3.43669	31.0838	0.945104	0.124165	0.110627	83	0.820892	3.25918	26.0282	0.942063	0.124165	0.110627	53	165.058	23	23	89.37	89.37	NA	0
TCGA-EE-A2M5-06A-12R-A18S-07	76b9b320-f504-4db6-9ddd-cd84b26a2212	800e0be9-64ca-43ff-8518-f18c15d0cefa	SKCM	76b9b320-f504-4db6-9ddd-cd84b26a2212-111122_UNC15-SN850_0149_BC0588ACXX_7_ATCACG	252.081	16	16	96.93	96.93	NA	0	1	0	1	NA	1	NA	0	1	0	1	NA	1	2428.38	17.0667	16.4621	98.9133	98.6381	0.83057	2.24923	9.48039	0.841605	0.339703	0.104909	15	0.843063	2.09493	8.12489	0.814736	0.378153	0.104909	12	104.901	17	17	96	96	NA	0
TCGA-EE-A2M6-06A-12R-A18S-07	c7a5f845-3549-4ef5-98ca-91cb9d898955	0d53cf3e-63d6-465b-b1b6-763b9a29dc64	SKCM	c7a5f845-3549-4ef5-98ca-91cb9d898955-111122_UNC15-SN850_0149_BC0588ACXX_7_ACTTGA	NA	NA	NA	NA	NA	NA	NA	NA	NA	NA	NA	NA	NA	NA	NA	NA	NA	NA	NA	5560.4	17.3	18.3377	99.092	99.4237	0.729563	2.18557	8.89575	0.768486	0.45915	0.0702169	20	0.772647	2.09237	8.10407	0.766257	0.45915	0.0702169	15	NA	NA	NA	NA	NA	NA	NA
TCGA-EE-A2M7-06A-11R-A18U-07	3dd1905a-f451-4c36-8d77-de1c758d3e22	98f08cdf-bfca-480d-80ed-bb83b74fb738	SKCM	3dd1905a-f451-4c36-8d77-de1c758d3e22-120220_UNC9-SN296_0273_BD0MN6ACXX_7_TGACCA	803.948	18.3333	18.4698	91.7767	91.0436	0.99256	1.09044	2.97558	0.661075	0.394095	0.308113	3	0.99256	1.09044	2.97558	0.661075	0.394095	0.308113	3	72.2418	26	26	100	100	NA	0	1	0	1	NA	1	NA	0	1	0	1	NA	1	NA	NA	NA	NA	NA	NA	NA
TCGA-EE-A2M8-06A-12R-A18S-07	6609cd36-74cd-4391-bec6-a9b0afcc92bb	21a2d09c-5447-4a58-b6eb-b4d167d7b370	SKCM	6609cd36-74cd-4391-bec6-a9b0afcc92bb-120109_UNC11-SN627_0176_AC0CKDACXX_2_TTAGGC	973.433	19.6	19.2251	90.224	89.6664	0.850815	1.36933	3.93273	0.711678	0.415322	0.258034	5	0.850815	1.36933	3.93273	0.711678	0.415322	0.258034	5	69900.2	17.9444	17.8641	93.93	95.8561	0.753566	3.64446	38.262	0.939185	0.185129	0.102797	126	0.767112	3.47701	32.3628	0.93284	0.196638	0.102894	93	665.284	20.6667	20.3535	93.3133	93.5482	0.934862	1.02705
TCGA-EE-A2MC-06A-12R-A18S-07	264905fa-4b50-4d2a-854a-8927c8932f28	a2e7de4e-d673-40ae-aa00-37e1a8cebbf5	SKCM	264905fa-4b50-4d2a-854a-8927c8932f28-111122_UNC15-SN850_0149_BC0588ACXX_8_GGCTAC	521.896	18.6667	19.0849	92.3233	92.103	0.992818	1.09072	2.97642	0.661564	0.369151	0.355286	3	0.992818	1.09072	2.97642	0.661564	0.369151	0.355286	3	34105.6	16.5517	14.9394	98.5666	96.9539	0.585418	2.37706	10.7731	0.812777	0.348659	0.193809	58	0.624109	2.30226	9.99679	0.809779	0.350043	0.196491	40	167.74	19	19	99.6933	99.9201	0.527724	0.579764
TCGA-EE-A2MD-06A-11R-A18T-07	83b8f4da-e725-4cd4-ab81-80376e9f1742	c862a72f-d317-4419-905f-bf42adb784d9	SKCM	83b8f4da-e725-4cd4-ab81-80376e9f1742-120124_UNC16-SN851_0123_AC0FDJACXX_7_CTTGTA	584.341	16	16	97.37	97.37	NA	0	1	0	1	NA	1	NA	0	1	0	1	NA	1	54553.2	17.6723	17.9165	98.0304	97.8527	0.848122	4.05328	57.5862	0.972883	0.0719278	0.0595217	119	0.850106	3.70366	40.5958	0.958741	0.130115	0.0703698	78	NA	NA	NA	NA	NA	NA	NA
TCGA-EE-A2ME-06A-11R-A18T-07	6730cbe8-6435-42ae-8fad-663496f8a1b3	c3bf2363-4bb5-4de7-ac82-0c4fa11eee7b	SKCM	6730cbe8-6435-42ae-8fad-663496f8a1b3-120201_UNC11-SN627_0182_BD0MYMACXX_8_CTTGTA	3288.95	17.7143	18.8101	91.3671	92.5591	0.597548	1.16277	3.1988	0.588677	0.562084	0.30162	7	0.597548	1.16277	3.1988	0.588677	0.562084	0.30162	7	51225.4	17.4034	16.799	91.2508	91.1021	0.721244	3.44691	31.4033	0.869904	0.349175	0.0372632	119	0.729755	3.3751	29.2271	0.868978	0.349381	0.0372632	102	89.8542	16	16	88.16	88.16	NA	0
TCGA-EE-A2MF-06A-11R-A21D-07	cad7fddc-3fb3-44a6-b6d6-7f8523201904	f7ca3f9e-6de3-4c37-aecc-a5ac2782ec1f	SKCM	cad7fddc-3fb3-44a6-b6d6-7f8523201904-120327_UNC10-SN254_0342_BC0LCYACXX_6_GCCAAT	101.868	17	17	100	100	NA	0	1	0	1	NA	1	NA	0	1	0	1	NA	1	3244.56	18.75	19.4521	93.495	92.3604	0.751334	1.04157	2.83366	0.589757	0.52869	0.351447	4	0.751334	1.04157	2.83366	0.589757	0.52869	0.351447	4	NA	NA	NA	NA	NA	NA	NA
TCGA-EE-A2MG-06A-11R-A18T-07	4a63cc0d-e3d9-45cc-bc10-b304ed6c3a8f	89d28931-1552-4274-8abb-9fba776c06f7	SKCM	4a63cc0d-e3d9-45cc-bc10-b304ed6c3a8f-120207_UNC10-SN254_0325_AC0C6MACXX_1_CTTGTA	NA	NA	NA	NA	NA	NA	NA	NA	NA	NA	NA	NA	NA	NA	NA	NA	NA	NA	NA	2838.78	18.7647	18.5183	92.3182	92.9342	0.962328	2.72648	15.279	0.927319	0.136062	0.103201	17	0.956549	2.65212	14.184	0.921563	0.136062	0.107327	16	NA	NA	NA	NA	NA	NA	NA
TCGA-EE-A2MH-06A-11R-A18S-07	0ed8dc16-21aa-49f5-9df8-822c00d3dddc	90e347db-bfa3-4ee0-9441-d4f275648023	SKCM	0ed8dc16-21aa-49f5-9df8-822c00d3dddc-111122_UNC15-SN850_0149_BC0588ACXX_8_TAGCTT	1160.42	16.5	16.4549	91.5975	92.0539	0.827163	1.14669	3.14776	0.637034	0.479923	0.339087	4	0.827163	1.14669	3.14776	0.637034	0.479923	0.339087	4	5781.61	15	14.7627	94.2283	95.4992	0.800734	1.98975	7.3137	0.801471	0.372273	0.187816	12	0.802358	1.8475	6.34393	0.784299	0.379533	0.187816	10	124.713	18	18	94.59	94.59	NA	0
TCGA-EE-A2MI-06A-11R-A18U-07	6bb1790f-9139-4617-8315-fefdf57de8d1	a8b63750-fd87-4129-98e8-54e778671520	SKCM	6bb1790f-9139-4617-8315-fefdf57de8d1-120221_UNC14-SN744_0207_AC0F2EACXX_8_GGCTAC	NA	NA	NA	NA	NA	NA	NA	NA	NA	NA	NA	NA	NA	NA	NA	NA	NA	NA	NA	NA	NA	NA	NA	NA	NA	NA	NA	NA	NA	NA	NA	NA	NA	NA	NA	NA	NA	NA	NA	NA	NA	NA	NA	NA	NA
TCGA-EE-A2MJ-06A-11R-A18S-07	ed9b2427-5e57-443e-bdab-64a66d073d5d	3669c448-0958-458b-a4f8-6fe064deb817	SKCM	ed9b2427-5e57-443e-bdab-64a66d073d5d-111122_UNC16-SN851_0110_AD095TACXX_1_GGCTAC	292.576	17	17	91.56	91.56	NA	0	1	0	1	NA	1	NA	0	1	0	1	NA	1	4765.93	16.5862	16.7416	97.1479	96.5241	0.842977	2.83855	17.091	0.905203	0.24263	0.102241	29	0.870315	2.64969	14.1497	0.894031	0.254431	0.116823	21	558.952	17	17.3738	100	100	0.827102	1.14661
TCGA-EE-A2MK-06A-11R-A18S-07	7d34ceb8-6245-4368-832d-03cd68b2a032	634e6e3a-bbfa-4be9-bcde-b8d0c53b22d9	SKCM	7d34ceb8-6245-4368-832d-03cd68b2a032-120109_UNC11-SN627_0176_AC0CKDACXX_3_TAGCTT	NA	NA	NA	NA	NA	NA	NA	NA	NA	NA	NA	NA	NA	NA	NA	NA	NA	NA	NA	51511.1	14.75	13.9899	98.08	97.1394	0.310341	0.929697	2.53374	0.465341	0.687552	0.247745	20	0.336005	0.886738	2.4272	0.461584	0.687905	0.254242	14	800.175	14.5	14.0997	100	100	0.467981	0.32438
TCGA-EE-A2ML-06A-11R-A18S-07	0b574b8d-f271-4f61-b473-8909fc4b46c3	5f104bd0-e54a-4896-805e-7c51024fb826	SKCM	0b574b8d-f271-4f61-b473-8909fc4b46c3-111122_UNC16-SN851_0110_AD095TACXX_2_GGCTAC	898.734	16	16.3253	92.925	92.9083	0.892715	1.23757	3.44721	0.663833	0.503981	0.172037	4	0.892715	1.23757	3.44721	0.663833	0.503981	0.172037	4	6187.82	18.3636	19.1829	91.4518	92.2022	0.86284	2.66708	14.3978	0.903718	0.197815	0.164659	22	0.881902	2.64194	14.0405	0.903175	0.197815	0.164659	20	NA	NA	NA	NA	NA	NA	NA
TCGA-EE-A2MM-06A-11R-A18S-07	4ef60405-9a2d-4267-9a6c-021e7a88f140	6e4145d0-e417-4690-8956-c5d1c1194fe3	SKCM	4ef60405-9a2d-4267-9a6c-021e7a88f140-111122_UNC16-SN851_0110_AD095TACXX_1_TTAGGC	NA	NA	NA	NA	NA	NA	NA	NA	NA	NA	NA	NA	NA	NA	NA	NA	NA	NA	NA	19583.8	18.0571	17.0464	97.212	96.0112	0.68776	2.44523	11.5332	0.800274	0.419254	0.105244	35	0.70098	2.40716	11.1023	0.799694	0.419254	0.105244	31	123.546	20	20	96.3	96.3	NA	0
TCGA-EE-A2MN-06A-11R-A18S-07	05186965-04b3-4a52-b774-5ce94209aa5a	3c377bc7-e299-437b-89b5-62ae8a82675d	SKCM	05186965-04b3-4a52-b774-5ce94209aa5a-111122_UNC16-SN851_0110_AD095TACXX_2_ACTTGA	1414.47	18.4286	18.4827	97.5657	96.7137	0.896439	1.74439	5.7224	0.8091	0.240853	0.229539	7	0.952831	1.70724	5.51374	0.807503	0.240853	0.229539	6	44247.1	16.3	16.4931	98.1599	98.0075	0.832763	4.17267	64.8886	0.970094	0.104293	0.084403	150	0.874552	3.8539	47.1769	0.963915	0.113006	0.0848868	82	4676.37	14.6	16.4893	99.1876	99.2495	0.734242	2.36343
TCGA-EE-A2MP-06A-11R-A18S-07	5632086a-a631-4404-a18a-8ed149e3d551	6b3cfa2d-5fe6-43d6-b032-2938f83cbf21	SKCM	5632086a-a631-4404-a18a-8ed149e3d551-111122_UNC16-SN851_0110_AD095TACXX_3_TAGCTT	NA	NA	NA	NA	NA	NA	NA	NA	NA	NA	NA	NA	NA	NA	NA	NA	NA	NA	NA	NA	NA	NA	NA	NA	NA	NA	NA	NA	NA	NA	NA	NA	NA	NA	NA	NA	NA	NA	NA	NA	NA	NA	NA	NA	NA
TCGA-EE-A2MQ-06A-11R-A18S-07	d9391b97-3f0f-4f75-b407-af37167738a3	ade35c8d-30dd-4e45-9f7c-9818072a02db	SKCM	d9391b97-3f0f-4f75-b407-af37167738a3-120109_UNC11-SN627_0176_AC0CKDACXX_3_ACTTGA	NA	NA	NA	NA	NA	NA	NA	NA	NA	NA	NA	NA	NA	NA	NA	NA	NA	NA	NA	11881.6	18.0333	17.4822	95.4113	95.4726	0.866836	2.94828	19.0731	0.923694	0.179993	0.112195	30	0.869184	2.86469	17.5436	0.920565	0.179993	0.112195	27	NA	NA	NA	NA	NA	NA	NA
TCGA-EE-A2MR-06A-11R-A18S-07	17b5e07c-fbb5-4250-bbcc-63623b8f7432	e42f3ef2-94ff-4661-8926-1c01b0d60211	SKCM	17b5e07c-fbb5-4250-bbcc-63623b8f7432-111122_UNC16-SN851_0110_AD095TACXX_3_TTAGGC	191.547	18	18	92.34	92.34	NA	0	1	0	1	NA	1	NA	0	1	0	1	NA	1	12765.9	16.907	17.4735	96.2123	94.8154	0.828246	3.1152	22.5379	0.91578	0.23411	0.115278	43	0.835506	2.9463	19.0353	0.905768	0.23411	0.151794	34	NA	NA	NA	NA	NA	NA	NA
TCGA-EE-A2MS-06A-11R-A18S-07	355ee878-dc4a-4886-8961-b0549db73cd5	926ac720-e414-4e84-ae09-9df5a7359cfb	SKCM	355ee878-dc4a-4886-8961-b0549db73cd5-111122_UNC16-SN851_0110_AD095TACXX_4_GGCTAC	1042.14	21.6667	19.1381	93.2167	92.9575	0.826157	0.907627	2.47843	0.53401	0.624803	0.238712	3	0.826157	0.907627	2.47843	0.53401	0.624803	0.238712	3	83563.7	17.3894	17.8579	95.6869	96.2259	0.800462	3.78409	43.9958	0.959317	0.111422	0.0783462	113	0.815536	3.53187	34.1878	0.952522	0.111422	0.0933213	76	NA	NA	NA	NA	NA	NA	NA
TCGA-EE-A2MT-06A-11R-A18S-07	c764a6c5-34ca-4b63-bb68-94dab2cdac64	c4b1fa78-db04-4352-92cd-ba94589424c3	SKCM	c764a6c5-34ca-4b63-bb68-94dab2cdac64-120109_UNC11-SN627_0176_AC0CKDACXX_4_TAGCTT	NA	NA	NA	NA	NA	NA	NA	NA	NA	NA	NA	NA	NA	NA	NA	NA	NA	NA	NA	24106.1	17.8537	19.4444	96.888	96.214	0.750782	2.78808	16.2499	0.89581	0.197968	0.184117	41	0.804477	2.70891	15.0129	0.893611	0.199667	0.184492	29	193.603	12	12	98.75	98.75	NA	0
TCGA-EE-A2MU-06A-21R-A18S-07	6e0ddcb8-48fe-4647-9c0e-7da776e3c55e	1fd474c9-0ccd-44f3-bf7b-9bb6a2a1e297	SKCM	6e0ddcb8-48fe-4647-9c0e-7da776e3c55e-111122_UNC16-SN851_0110_AD095TACXX_4_ACTTGA	1338.97	12	13.1397	99.3725	99.3882	0.745681	1.03373	2.81154	0.602676	0.534931	0.286508	4	0.996477	0.690705	1.99512	0.49756	0.534931	0.465069	2	29843.5	17.0781	17.0482	94.6095	94.2917	0.827109	3.43985	31.1823	0.93596	0.19711	0.0847326	64	0.840609	3.30513	27.2521	0.932452	0.198069	0.0847326	51	680.852	15	15	99.13	99.13	NA	0
TCGA-EE-A3AA-06A-11R-A18S-07	02a62243-a257-40fb-a0cc-2a4061d64a72	b8a63774-db74-4cd6-9ac0-065f1126448d	SKCM	02a62243-a257-40fb-a0cc-2a4061d64a72-120109_UNC11-SN627_0176_AC0CKDACXX_4_GATCAG	61.4006	22	22	100	100	NA	0	1	0	1	NA	1	NA	0	1	0	1	NA	1	1697.14	18.2941	17.6739	96.78	94.8303	0.907953	2.57242	13.0975	0.901593	0.208969	0.147763	17	0.919788	2.42737	11.3291	0.893652	0.208969	0.147763	14	NA	NA	NA	NA	NA	NA	NA
TCGA-EE-A3AB-06A-11R-A18S-07	400dd6b5-00ca-4fd4-bc46-ed0a25fdd1b8	ab9918f6-7417-47ec-aaf7-0e30a40e2bdc	SKCM	400dd6b5-00ca-4fd4-bc46-ed0a25fdd1b8-120109_UNC11-SN627_0176_AC0CKDACXX_5_TAGCTT	647.096	13.6667	14.2404	94.15	93.9254	0.943414	1.03645	2.81918	0.626211	0.478019	0.328276	3	0.943414	1.03645	2.81918	0.626211	0.478019	0.328276	3	9343.18	16.6364	15.2936	94.6791	97.6195	0.625389	2.18668	8.90559	0.7826	0.417123	0.134513	33	0.720263	1.90082	6.69135	0.771323	0.417964	0.143238	14	NA	NA	NA	NA	NA	NA	NA
TCGA-EE-A3AC-06A-11R-A18S-07	7dc1e853-457d-4432-ac17-dc38b2866409	7c9fd31d-7fea-4178-be9f-75619ff9ff08	SKCM	7dc1e853-457d-4432-ac17-dc38b2866409-111122_UNC16-SN851_0110_AD095TACXX_5_ATCACG	367.559	16	16	89.47	89.47	NA	0	1	0	1	NA	1	NA	0	1	0	1	NA	1	7907.24	18.0476	19.8654	96.6929	95.8947	0.82859	2.52266	12.4617	0.889564	0.205234	0.166597	21	0.861334	2.44034	11.477	0.886887	0.205234	0.166597	17	NA	NA	NA	NA	NA	NA	NA
TCGA-EE-A3AD-06A-11R-A18S-07	2ef22125-d7cb-46f9-bee2-29ad0ef4d2e5	08997d9f-db88-4f45-9d76-772cb9acc75d	SKCM	2ef22125-d7cb-46f9-bee2-29ad0ef4d2e5-111122_UNC16-SN851_0110_AD095TACXX_6_GATCAG	NA	NA	NA	NA	NA	NA	NA	NA	NA	NA	NA	NA	NA	NA	NA	NA	NA	NA	NA	NA	NA	NA	NA	NA	NA	NA	NA	NA	NA	NA	NA	NA	NA	NA	NA	NA	NA	NA	NA	NA	NA	NA	NA	NA	NA
TCGA-EE-A3AE-06A-11R-A18S-07	49ab3769-be2e-4254-86df-08e942fba3d4	55ad742e-cc71-4ebe-9f91-8242d60b46e0	SKCM	49ab3769-be2e-4254-86df-08e942fba3d4-111122_UNC16-SN851_0110_AD095TACXX_5_TAGCTT	231.256	22.5	23.3472	91.735	90.6591	0.9155	0.634576	1.88622	0.442582	0.669438	0.330562	2	0.9155	0.634576	1.88622	0.442582	0.669438	0.330562	2	100635	18.281	18.3392	97.8055	96.2808	0.718473	3.44565	31.3636	0.901234	0.291366	0.0479327	121	0.730924	3.02832	20.6625	0.889826	0.293253	0.0757968	63	10308.9	19.6667	19.183	95.6698	95.6185	0.804235	3.11336
TCGA-EE-A3AF-06A-11R-A18S-07	9c32b568-bb5e-4486-a01a-8fde2778c44b	62a9e3ff-39a3-4a87-ae5b-9f5b0bd312a5	SKCM	9c32b568-bb5e-4486-a01a-8fde2778c44b-120109_UNC11-SN627_0176_AC0CKDACXX_5_ATCACG	NA	NA	NA	NA	NA	NA	NA	NA	NA	NA	NA	NA	NA	NA	NA	NA	NA	NA	NA	198.056	17	17	84.4425	84.5525	0.907898	1.25861	3.52054	0.688927	0.373565	0.373565	4	NA	0	1	0	1	NA	1	NA	NA	NA	NA	NA	NA	NA
TCGA-EE-A3AG-06A-31R-A18S-07	6d5ffe96-c3a9-4edf-a4e6-51c7978093cf	faa7c094-e5c2-4ae7-b984-7377fcfff9ac	SKCM	6d5ffe96-c3a9-4edf-a4e6-51c7978093cf-111122_UNC16-SN851_0110_AD095TACXX_6_TAGCTT	NA	NA	NA	NA	NA	NA	NA	NA	NA	NA	NA	NA	NA	NA	NA	NA	NA	NA	NA	NA	NA	NA	NA	NA	NA	NA	NA	NA	NA	NA	NA	NA	NA	NA	NA	NA	NA	NA	NA	NA	NA	NA	NA	NA	NA
TCGA-EE-A3AH-06A-11R-A18S-07	67d64be7-fa05-4e48-9482-239b7955a3f8	5355bc61-3358-4261-9a6a-cd9950b91ee5	SKCM	67d64be7-fa05-4e48-9482-239b7955a3f8-111122_UNC16-SN851_0110_AD095TACXX_7_TTAGGC	NA	NA	NA	NA	NA	NA	NA	NA	NA	NA	NA	NA	NA	NA	NA	NA	NA	NA	NA	NA	NA	NA	NA	NA	NA	NA	NA	NA	NA	NA	NA	NA	NA	NA	NA	NA	NA	NA	NA	NA	NA	NA	NA	NA	NA
TCGA-EE-A3J3-06A-11R-A20F-07	cfc910ef-bb45-4936-ba0c-9e999c663b1c	c494f4cb-475a-4a4a-9b85-586c2e3e341a	SKCM	cfc910ef-bb45-4936-ba0c-9e999c663b1c-120327_UNC10-SN254_0342_BC0LCYACXX_7_CTTGTA	NA	NA	NA	NA	NA	NA	NA	NA	NA	NA	NA	NA	NA	NA	NA	NA	NA	NA	NA	17273.6	17.4545	16.7759	95.863	94.6134	0.824245	2.88198	17.8496	0.899561	0.269197	0.0796941	33	0.838979	2.85353	17.349	0.898898	0.269197	0.0796941	30	175.722	15	15	92.21	92.21	NA	0
TCGA-EE-A3J4-06A-11R-A20F-07	1bd27a1e-d05b-475a-a6b8-ae6fd3033eef	fce35066-a840-4101-b28c-8a584d8c5e54	SKCM	1bd27a1e-d05b-475a-a6b8-ae6fd3033eef-120327_UNC10-SN254_0342_BC0LCYACXX_7_ACAGTG	NA	NA	NA	NA	NA	NA	NA	NA	NA	NA	NA	NA	NA	NA	NA	NA	NA	NA	NA	NA	NA	NA	NA	NA	NA	NA	NA	NA	NA	NA	NA	NA	NA	NA	NA	NA	NA	NA	NA	NA	NA	NA	NA	NA	NA
TCGA-EE-A3J5-06A-11R-A20F-07	7018f900-a49e-44cb-8112-8ab79fcf5907	315e9fee-404c-4f59-829b-d769e965c87e	SKCM	7018f900-a49e-44cb-8112-8ab79fcf5907-120327_UNC10-SN254_0342_BC0LCYACXX_8_TAGCTT	4339.87	17.75	18.8015	86.9075	90.5387	0.665809	0.923007	2.51685	0.528946	0.61501	0.29635	4	0.665809	0.923007	2.51685	0.528946	0.61501	0.29635	4	52645.8	18.4186	20.6734	96.3912	94.3668	0.610933	2.72131	15.2002	0.800642	0.422815	0.112671	86	0.634989	2.54461	12.7383	0.792754	0.423786	0.140381	55	2154.46	16.625	15.7449	98.4737	99.2039	0.725056	1.50771
TCGA-EE-A3J7-06A-11R-A20F-07	98362ddf-463b-484d-b743-c10d9b6b875c	1dcb8c9f-677e-4884-a119-50460646ba33	SKCM	98362ddf-463b-484d-b743-c10d9b6b875c-120327_UNC10-SN254_0342_BC0LCYACXX_8_CGATGT	NA	NA	NA	NA	NA	NA	NA	NA	NA	NA	NA	NA	NA	NA	NA	NA	NA	NA	NA	NA	NA	NA	NA	NA	NA	NA	NA	NA	NA	NA	NA	NA	NA	NA	NA	NA	NA	NA	NA	NA	NA	NA	NA	NA	NA
TCGA-EE-A3J8-06A-11R-A20F-07	1aa070c0-8679-4e80-8de6-ab7c2d572acf	cb033feb-06ad-4674-bc0b-6539efb9aa85	SKCM	1aa070c0-8679-4e80-8de6-ab7c2d572acf-120327_UNC13-SN749_0162_AC0LTLACXX_1_GCCAAT	NA	NA	NA	NA	NA	NA	NA	NA	NA	NA	NA	NA	NA	NA	NA	NA	NA	NA	NA	NA	NA	NA	NA	NA	NA	NA	NA	NA	NA	NA	NA	NA	NA	NA	NA	NA	NA	NA	NA	NA	NA	NA	NA	NA	NA
TCGA-EE-A3JA-06A-11R-A20F-07	89268a97-a3b4-4d46-bc0b-5e7e879ebe77	68e90f56-7070-47e8-874f-9e7c45bd84fd	SKCM	89268a97-a3b4-4d46-bc0b-5e7e879ebe77-120327_UNC13-SN749_0162_AC0LTLACXX_1_GGCTAC	NA	NA	NA	NA	NA	NA	NA	NA	NA	NA	NA	NA	NA	NA	NA	NA	NA	NA	NA	3247.61	17.2653	16.9663	98.1378	97.9166	0.850694	3.31075	27.4056	0.932799	0.214148	0.0653804	49	0.893289	3.03825	20.8688	0.920182	0.234338	0.0653804	30	NA	NA	NA	NA	NA	NA	NA
TCGA-EE-A3JB-06A-11R-A21D-07	dc03531c-ce37-4c37-a763-244353b9ba6d	a4c3676d-fc5d-4d26-8627-6f494657b84a	SKCM	dc03531c-ce37-4c37-a763-244353b9ba6d-120405_UNC10-SN254_0345_AD0VAVACXX_2_GGCTAC	NA	NA	NA	NA	NA	NA	NA	NA	NA	NA	NA	NA	NA	NA	NA	NA	NA	NA	NA	80.6881	16	16	96.49	96.49	NA	0	1	0	1	NA	1	NA	0	1	0	1	NA	1	NA	NA	NA	NA	NA	NA	NA
TCGA-EE-A3JD-06A-11R-A20F-07	1f84b962-e9b4-44d8-8183-5f9ac03ae79b	3ada0d86-a7dd-4ef8-ab88-bff478010c5e	SKCM	1f84b962-e9b4-44d8-8183-5f9ac03ae79b-120327_UNC13-SN749_0162_AC0LTLACXX_2_CGATGT	557.586	19.125	18.4696	94.9638	94.5405	0.91151	1.89543	6.65542	0.827959	0.256596	0.232264	8	0.95115	1.53082	4.62195	0.770491	0.306765	0.232931	5	4930.21	18.4651	18.2639	97.7988	97.8172	0.880053	3.31006	27.3867	0.949936	0.117401	0.0836756	43	0.892469	2.87275	17.6856	0.924656	0.179492	0.0843958	25	NA	NA	NA	NA	NA	NA	NA
TCGA-EE-A3JE-06A-11R-A20F-07	83040288-557f-4ec8-b2ba-314b1da9f03e	4a379a56-c92f-4ed8-8d9f-513b4737ec31	SKCM	83040288-557f-4ec8-b2ba-314b1da9f03e-120327_UNC13-SN749_0162_AC0LTLACXX_2_ACAGTG	4782.6	16.1538	16.1289	91.1185	93.2862	0.846553	2.17137	8.77025	0.854448	0.267831	0.16836	13	0.841529	1.93769	6.94272	0.819468	0.267831	0.265491	10	42536.8	17.0222	17.5417	93.0203	92.9282	0.64177	2.88784	17.9545	0.835789	0.372274	0.132779	90	0.648872	2.63471	13.9392	0.821751	0.385945	0.134477	58	85.6601	14	14	91.45	91.45	NA	0
TCGA-EE-A3JH-06A-11R-A21D-07	fcaf0230-895c-4025-ae27-fa2e5aa26cb3	9557fb82-baa4-4adf-a33e-7c50774fb604	SKCM	fcaf0230-895c-4025-ae27-fa2e5aa26cb3-130702_UNC9-SN296_0380_BC24VKACXX_7_GATCAG	355.218	12.5	11.4317	92.31	89.8742	0.594328	0.411957	1.50977	0.246367	0.856113	0.143887	2	0.594328	0.411957	1.50977	0.246367	0.856113	0.143887	2	242566	17.5705	17.5004	91.1258	91.1522	0.769897	3.85252	47.1118	0.965547	0.0974923	0.0816586	149	0.841032	3.51079	33.4748	0.956547	0.112696	0.0908922	65	NA	NA	NA	NA	NA	NA	NA
TCGA-EE-A3JI-06A-11R-A21D-07	a0725b6a-a045-42b6-b8d3-ef340941b8ad	dca3aac8-2cc3-41fb-b030-0b0084ca6217	SKCM	a0725b6a-a045-42b6-b8d3-ef340941b8ad-120405_UNC10-SN254_0345_AD0VAVACXX_3_ACAGTG	NA	NA	NA	NA	NA	NA	NA	NA	NA	NA	NA	NA	NA	NA	NA	NA	NA	NA	NA	1431.01	17	21.2526	91.56	91.2961	0.556893	0.611809	1.84376	0.324101	0.810585	0.116063	3	0.556893	0.611809	1.84376	0.324101	0.810585	0.116063	3	NA	NA	NA	NA	NA	NA	NA
TCGA-ER-A193-06A-12R-A18S-07	65ac4127-50f3-4bd6-ba8a-2491a79c5a13	33f43961-b32d-46fc-ba11-264f1101e78d	SKCM	65ac4127-50f3-4bd6-ba8a-2491a79c5a13-111122_UNC16-SN851_0110_AD095TACXX_7_ACTTGA	NA	NA	NA	NA	NA	NA	NA	NA	NA	NA	NA	NA	NA	NA	NA	NA	NA	NA	NA	NA	NA	NA	NA	NA	NA	NA	NA	NA	NA	NA	NA	NA	NA	NA	NA	NA	NA	NA	NA	NA	NA	NA	NA	NA	NA
TCGA-ER-A194-01A-11R-A18U-07	ab474f26-e8ce-43af-a14f-f04ab1caaa68	376614bb-480e-4a7f-9539-da6ce053988a	SKCM	ab474f26-e8ce-43af-a14f-f04ab1caaa68-120220_UNC9-SN296_0273_BD0MN6ACXX_8_ACAGTG	NA	NA	NA	NA	NA	NA	NA	NA	NA	NA	NA	NA	NA	NA	NA	NA	NA	NA	NA	258.25	26	26	97.98	97.98	NA	0	1	0	1	NA	1	NA	0	1	0	1	NA	1	NA	NA	NA	NA	NA	NA	NA
TCGA-ER-A195-06A-11R-A18U-07	21b57102-d0b7-453a-bcad-6dea059b7473	5f9b87f7-a92d-49c6-b84e-b84b92a637cf	SKCM	21b57102-d0b7-453a-bcad-6dea059b7473-120220_UNC9-SN296_0273_BD0MN6ACXX_8_GATCAG	668.242	17	17	87.555	83.7522	0.502217	0.348111	1.41639	0.196991	0.889236	0.110764	2	0.502217	0.348111	1.41639	0.196991	0.889236	0.110764	2	15789.7	15.7826	16.2896	94.7657	93.9706	0.7882	2.4714	11.839	0.87205	0.29143	0.104801	23	0.823336	2.42426	11.2939	0.870309	0.29143	0.104801	19	2581.23	16.2	17.082	94.904	94.5227	0.838932	1.35021
TCGA-ER-A196-01A-11R-A18T-07	ae5b72d6-a736-48bb-8205-be4acbcba86f	7f8bad33-c92b-48f6-99b1-2165784efd8f	SKCM	ae5b72d6-a736-48bb-8205-be4acbcba86f-120109_UNC11-SN627_0176_AC0CKDACXX_6_GGCTAC	113.053	15	15	83.98	83.98	NA	0	1	0	1	NA	1	NA	0	1	0	1	NA	1	14306.6	16.8333	16.1279	84.2583	80.7013	0.621307	1.11323	3.04418	0.59137	0.57089	0.261484	6	0.621307	1.11323	3.04418	0.59137	0.57089	0.261484	6	NA	NA	NA	NA	NA	NA	NA
TCGA-ER-A197-06A-32R-A18S-07	450d634b-8f32-4ae0-a0bb-8193beb94a2a	30e65995-e4e6-40c0-a8af-823cc6fde4a8	SKCM	450d634b-8f32-4ae0-a0bb-8193beb94a2a-111122_UNC16-SN851_0110_AD095TACXX_8_GATCAG	NA	NA	NA	NA	NA	NA	NA	NA	NA	NA	NA	NA	NA	NA	NA	NA	NA	NA	NA	NA	NA	NA	NA	NA	NA	NA	NA	NA	NA	NA	NA	NA	NA	NA	NA	NA	NA	NA	NA	NA	NA	NA	NA	NA	NA
TCGA-ER-A198-06A-11R-A18T-07	4b31a7e6-1df6-41fa-a3a1-5dd844d6d55c	e9cf2488-2eb5-4187-97a5-9dd98971a015	SKCM	4b31a7e6-1df6-41fa-a3a1-5dd844d6d55c-120207_UNC10-SN254_0325_AC0C6MACXX_1_TGACCA	NA	NA	NA	NA	NA	NA	NA	NA	NA	NA	NA	NA	NA	NA	NA	NA	NA	NA	NA	9017.58	17.2353	16.6844	95.4341	96.7678	0.787374	2.2308	9.30729	0.836895	0.295238	0.234151	17	0.78398	2.17366	8.79036	0.829794	0.295238	0.249313	16	NA	NA	NA	NA	NA	NA	NA
TCGA-ER-A199-06A-11R-A18T-07	509a63f1-7b2d-4a7a-8e0c-7b2e905d494e	862b334e-5cdd-4e05-b2db-8a5cbe64b097	SKCM	509a63f1-7b2d-4a7a-8e0c-7b2e905d494e-120109_UNC11-SN627_0176_AC0CKDACXX_7_GGCTAC	145.206	17	19.1018	98.7	99.2885	0.609101	0.422197	1.52531	0.254586	0.850295	0.149705	2	0.609101	0.422197	1.52531	0.254586	0.850295	0.149705	2	20082	18	18.3273	98.3064	98.1643	0.883994	4.16319	64.2766	0.976504	0.0725263	0.0639421	111	0.902838	3.84851	46.9231	0.969613	0.079257	0.0743662	71	1701.46	16.8	16.0091	99.73	99.8415	0.687516	1.10651
TCGA-ER-A19A-06A-21R-A18U-07	52746b80-9ac8-40ce-93cb-3f969f8d9123	386af7d3-6cfb-458e-a451-1faece442b9e	SKCM	52746b80-9ac8-40ce-93cb-3f969f8d9123-120221_UNC14-SN744_0207_AC0F2EACXX_8_ACTTGA	625.939	17	17	92	92	NA	0	1	0	1	NA	1	NA	0	1	0	1	NA	1	NA	NA	NA	NA	NA	NA	NA	NA	NA	NA	NA	NA	NA	NA	NA	NA	NA	NA	NA	NA	NA	NA	NA	NA	NA	NA
TCGA-ER-A19B-06A-11R-A18S-07	6a37bf55-de1e-41f4-b019-3d2e91493b4f	5eb1264b-f257-4b2e-8078-9baaefd51b7a	SKCM	6a37bf55-de1e-41f4-b019-3d2e91493b4f-111122_UNC16-SN851_0110_AD095TACXX_8_GGCTAC	NA	NA	NA	NA	NA	NA	NA	NA	NA	NA	NA	NA	NA	NA	NA	NA	NA	NA	NA	1462.04	19.6	20.3462	92.562	92.73	0.975255	1.56961	4.80479	0.78382	0.294615	0.223077	5	0.975255	1.56961	4.80479	0.78382	0.294615	0.223077	5	NA	NA	NA	NA	NA	NA	NA
TCGA-ER-A19C-06A-11R-A18S-07	a0c75a3d-84a2-47a3-9f1f-51e3ecc27aa7	533156e6-19df-4bef-9d3f-e78c6361b4da	SKCM	a0c75a3d-84a2-47a3-9f1f-51e3ecc27aa7-111122_UNC16-SN851_0111_BD09J2ACXX_1_ATCACG	NA	NA	NA	NA	NA	NA	NA	NA	NA	NA	NA	NA	NA	NA	NA	NA	NA	NA	NA	95.2868	16	16	93.86	93.86	NA	0	1	0	1	NA	1	NA	0	1	0	1	NA	1	NA	NA	NA	NA	NA	NA	NA
TCGA-ER-A19D-06A-11R-A18S-07	9cad5f4d-1643-4c4d-968e-2a4d7641b7c5	d48f5bc7-1cca-4435-8f59-d802fde708a8	SKCM	9cad5f4d-1643-4c4d-968e-2a4d7641b7c5-120109_UNC11-SN627_0176_AC0CKDACXX_8_GGCTAC	91.6366	19	19	91.32	91.32	NA	0	1	0	1	NA	1	NA	0	1	0	1	NA	1	16707.7	18.7755	19.1443	94.1769	95.2669	0.764267	2.97439	19.5777	0.869379	0.338522	0.0561911	49	0.78196	2.94111	18.9368	0.868936	0.338522	0.0561911	43	NA	NA	NA	NA	NA	NA	NA
TCGA-ER-A19E-06A-11R-A18S-07	4db876af-f81d-48b9-be7a-0b8a15e10b8f	7c23f39f-6b3f-41d8-bb17-c35788b2b060	SKCM	4db876af-f81d-48b9-be7a-0b8a15e10b8f-120109_UNC11-SN627_0176_AC0CKDACXX_6_GATCAG	6009.81	18.7778	19.475	89.8522	92.0006	0.691417	1.5192	4.56856	0.67731	0.523044	0.149375	9	0.691417	1.5192	4.56856	0.67731	0.523044	0.149375	9	3053.23	19.6	19.144	91.4893	88.6081	0.849187	2.29964	9.9706	0.863033	0.267884	0.16347	15	0.849187	2.29964	9.9706	0.863033	0.267884	0.16347	15	NA	NA	NA	NA	NA	NA	NA
TCGA-ER-A19F-06A-11R-A18S-07	e5cc0894-e297-4cef-ab22-a8a018852af8	c063e297-0583-4b7c-b1b9-3aaaae108aa6	SKCM	e5cc0894-e297-4cef-ab22-a8a018852af8-120109_UNC11-SN627_0176_AC0CKDACXX_7_ATCACG	NA	NA	NA	NA	NA	NA	NA	NA	NA	NA	NA	NA	NA	NA	NA	NA	NA	NA	NA	4319.67	16.1	21.14	96.507	94.8381	0.649331	1.49514	4.45996	0.683236	0.495965	0.225025	10	0.72788	1.41639	4.12221	0.679646	0.495965	0.225025	7	NA	NA	NA	NA	NA	NA	NA
TCGA-ER-A19G-06A-11R-A18U-07	bc7b26ba-8219-44d8-bf34-733cc8d0585b	b7f93347-5337-44ee-b26c-d6f10092dee6	SKCM	bc7b26ba-8219-44d8-bf34-733cc8d0585b-120308_UNC15-SN850_0174_BC0EUKACXX_1_GGCTAC	NA	NA	NA	NA	NA	NA	NA	NA	NA	NA	NA	NA	NA	NA	NA	NA	NA	NA	NA	31248.3	17.1373	17.7817	95.8105	95.9108	0.816152	3.77468	43.5835	0.95556	0.129311	0.0979698	102	0.843488	3.34889	28.4712	0.942269	0.138383	0.107839	53	1117.77	12	11.52	99.6067	99.5671	0.830779	0.912704
TCGA-ER-A19H-06A-12R-A18S-07	1f03536d-de92-4327-a159-f54191325b21	2a49e3c0-0263-422e-9fb9-6eea8727353e	SKCM	1f03536d-de92-4327-a159-f54191325b21-120118_UNC15-SN850_0163_AD0J87ACXX_8_ACTTGA	NA	NA	NA	NA	NA	NA	NA	NA	NA	NA	NA	NA	NA	NA	NA	NA	NA	NA	NA	17873.6	16.2063	16.7037	97.5589	96.8642	0.875544	3.6275	37.6186	0.959507	0.106624	0.094055	63	0.902772	3.37427	29.2028	0.951814	0.106624	0.101311	42	1747.45	12	12	95.83	95.83	NA	0
TCGA-ER-A19J-06A-11R-A18S-07	83d821c6-4d55-4631-ba2d-84c149e9fc22	098ef6ce-5605-407d-90ca-e5ce9c27878f	SKCM	83d821c6-4d55-4631-ba2d-84c149e9fc22-111122_UNC16-SN851_0111_BD09J2ACXX_1_GATCAG	NA	NA	NA	NA	NA	NA	NA	NA	NA	NA	NA	NA	NA	NA	NA	NA	NA	NA	NA	814.974	20.6667	23.5917	92.8467	91.1468	0.71868	0.789551	2.20241	0.455811	0.701094	0.212637	3	0.71868	0.789551	2.20241	0.455811	0.701094	0.212637	3	NA	NA	NA	NA	NA	NA	NA
TCGA-ER-A19K-01A-21R-A18T-07	d4f7f9c9-f065-471d-941f-efa15ddafae9	30f9edcc-a7d4-40fd-82d9-238fcd6c08b0	SKCM	d4f7f9c9-f065-471d-941f-efa15ddafae9-120127_UNC12-SN629_0182_BD0JFVACXX_6_CTTGTA	NA	NA	NA	NA	NA	NA	NA	NA	NA	NA	NA	NA	NA	NA	NA	NA	NA	NA	NA	NA	NA	NA	NA	NA	NA	NA	NA	NA	NA	NA	NA	NA	NA	NA	NA	NA	NA	NA	NA	NA	NA	NA	NA	NA	NA
TCGA-ER-A19L-06A-12R-A18S-07	b10a88d5-3469-4e19-956a-09d83e04149d	9f46343e-180d-4313-97fe-9810754ff66e	SKCM	b10a88d5-3469-4e19-956a-09d83e04149d-111122_UNC16-SN851_0111_BD09J2ACXX_2_GGCTAC	448.724	22.6667	23.7008	89.4733	88.5442	0.964629	1.05975	2.88566	0.641143	0.447876	0.330116	3	0.964629	1.05975	2.88566	0.641143	0.447876	0.330116	3	1158.19	16.5	16.9252	93.56	88.4575	0.383566	0.265867	1.30456	0.1384	0.925206	0.0747943	2	0.383566	0.265867	1.30456	0.1384	0.925206	0.0747943	2	NA	NA	NA	NA	NA	NA	NA
TCGA-ER-A19M-06A-61R-A239-07	4e59e102-b7f7-4918-bb6d-d59e28ddc9c4	6D0395F6-4EB7-4DBA-BFBE-E2E728482E37	SKCM	4e59e102-b7f7-4918-bb6d-d59e28ddc9c4-120817_UNC9-SN296_0312_AC0WHCACXX_7_ACAGTG	NA	NA	NA	NA	NA	NA	NA	NA	NA	NA	NA	NA	NA	NA	NA	NA	NA	NA	NA	3676.77	16.625	17.0244	96.565	95.5989	0.787878	1.63835	5.14665	0.763382	0.344874	0.261406	8	0.824301	1.60402	4.97296	0.760147	0.344874	0.261406	7	NA	NA	NA	NA	NA	NA	NA
TCGA-ER-A19N-06A-11R-A18S-07	98bbd999-95a9-4b90-b789-28feb335d54f	f2ee248c-017e-4765-98c2-dd4de98ed71b	SKCM	98bbd999-95a9-4b90-b789-28feb335d54f-111122_UNC16-SN851_0111_BD09J2ACXX_2_GATCAG	NA	NA	NA	NA	NA	NA	NA	NA	NA	NA	NA	NA	NA	NA	NA	NA	NA	NA	NA	304734	17.1179	16.7755	98.4458	98.5912	0.641335	3.53076	34.15	0.93785	0.133803	0.118441	246	0.594108	2.549	12.7943	0.79971	0.411	0.151733	73	121.515	20	20	100	100	NA	0
TCGA-ER-A19O-06A-11R-A18S-07	af206625-ec95-4c9b-a9cf-5860a7d14b01	c96ea91e-37ce-479c-85d9-a85a8ce92fab	SKCM	af206625-ec95-4c9b-a9cf-5860a7d14b01-120109_UNC11-SN627_0176_AC0CKDACXX_8_ACTTGA	727.634	20.6667	20.7642	89.47	90.5976	0.938378	1.03091	2.80363	0.619705	0.505924	0.280806	3	0.938378	1.03091	2.80363	0.619705	0.505924	0.280806	3	10595.5	17.2222	16.7216	88.1981	87.1386	0.894262	2.94734	19.0553	0.928616	0.158937	0.119854	27	0.885181	2.84929	17.2755	0.918717	0.189331	0.119854	25	NA	NA	NA	NA	NA	NA	NA
TCGA-ER-A19P-06A-11R-A18S-07	a7be1c51-559f-47bc-8429-4c57b8bb1576	3119d879-fd30-4eab-8abd-3a787a9929ba	SKCM	a7be1c51-559f-47bc-8429-4c57b8bb1576-111122_UNC16-SN851_0111_BD09J2ACXX_3_TTAGGC	8431.11	18.6	17.4872	90.8787	93.6233	0.655146	1.77417	5.89537	0.685683	0.532059	0.146137	15	0.663327	1.75056	5.75782	0.685094	0.532059	0.146137	14	177830	17.4252	17.9375	94.292	96.4383	0.779515	4.18286	65.5531	0.959379	0.161935	0.0476631	214	0.772836	3.72529	41.4832	0.945602	0.170922	0.0899284	124	10453.1	23.5714	21.8585	97.1086	98.5411	0.465012	0.904872
TCGA-ER-A19Q-06A-11R-A18U-07	0b9aa5d8-d021-464e-b59a-c449472409e1	28732e92-e7b8-43bf-8c40-0053b54bcc96	SKCM	0b9aa5d8-d021-464e-b59a-c449472409e1-120308_UNC15-SN850_0174_BC0EUKACXX_2_CGATGT	NA	NA	NA	NA	NA	NA	NA	NA	NA	NA	NA	NA	NA	NA	NA	NA	NA	NA	NA	NA	NA	NA	NA	NA	NA	NA	NA	NA	NA	NA	NA	NA	NA	NA	NA	NA	NA	NA	NA	NA	NA	NA	NA	NA	NA
TCGA-ER-A19S-06A-11R-A18U-07	2b2850d6-986b-4230-b82b-699b22b0ad7a	42369f63-d51b-481e-867b-d0b398cf4c88	SKCM	2b2850d6-986b-4230-b82b-699b22b0ad7a-120220_UNC15-SN850_0168_AD0MNAACXX_1_TGACCA	44763.6	17.25	15.3427	92.3025	93.6089	0.329556	0.818916	2.26804	0.351545	0.798072	0.0798649	12	0.360509	0.792118	2.20807	0.345766	0.801687	0.0798649	9	205538	16.4419	16.0628	89.66	91.5589	0.869261	5.07704	160.299	0.989738	0.0292888	0.0292888	344	0.852541	4.52551	92.3434	0.981208	0.0619095	0.0507288	202	NA	NA	NA	NA	NA	NA	NA
TCGA-ER-A19T-01A-11R-A18T-07	c95bc731-e496-415a-871e-95308b9a73a3	5df3d0b7-2531-4e68-b076-8780763dd6cc	SKCM	c95bc731-e496-415a-871e-95308b9a73a3-120124_UNC16-SN851_0124_BC0C16ACXX_2_TAGCTT	NA	NA	NA	NA	NA	NA	NA	NA	NA	NA	NA	NA	NA	NA	NA	NA	NA	NA	NA	NA	NA	NA	NA	NA	NA	NA	NA	NA	NA	NA	NA	NA	NA	NA	NA	NA	NA	NA	NA	NA	NA	NA	NA	NA	NA
TCGA-ER-A19T-06A-11R-A18U-07	e69fb1da-4e53-40d1-86cd-9a87b56e1ec6	12273db4-5bb3-4529-aaad-cc4b486c85c5	SKCM	e69fb1da-4e53-40d1-86cd-9a87b56e1ec6-120308_UNC15-SN850_0174_BC0EUKACXX_3_CAGATC	NA	NA	NA	NA	NA	NA	NA	NA	NA	NA	NA	NA	NA	NA	NA	NA	NA	NA	NA	NA	NA	NA	NA	NA	NA	NA	NA	NA	NA	NA	NA	NA	NA	NA	NA	NA	NA	NA	NA	NA	NA	NA	NA	NA	NA
TCGA-ER-A19W-06A-41R-A239-07	abec51c1-2c14-40f5-9279-12d54b315100	381B7A17-FCAC-45CF-90E8-8663262EC2AC	SKCM	abec51c1-2c14-40f5-9279-12d54b315100-120817_UNC9-SN296_0312_AC0WHCACXX_8_CTTGTA	NA	NA	NA	NA	NA	NA	NA	NA	NA	NA	NA	NA	NA	NA	NA	NA	NA	NA	NA	12542.3	18.587	18.8389	98.3226	97.7036	0.689126	2.63842	13.9911	0.871177	0.292474	0.108173	46	0.729922	2.31973	10.173	0.831896	0.351883	0.10854	24	NA	NA	NA	NA	NA	NA	NA
TCGA-ER-A1A1-06A-11R-A18U-07	f725c964-2de1-471d-8ebf-1bc85b19bebc	41c85504-a18f-437e-a05a-740e7faaea41	SKCM	f725c964-2de1-471d-8ebf-1bc85b19bebc-120308_UNC15-SN850_0174_BC0EUKACXX_4_GCCAAT	3199.95	17.2727	17.8616	90.5018	91.4904	0.838384	2.01036	7.46598	0.830758	0.252942	0.24871	11	0.838384	2.01036	7.46598	0.830758	0.252942	0.24871	11	47147.4	17.5224	18.1263	91.1952	91.857	0.834347	4.0865	59.5312	0.96284	0.113449	0.112277	134	0.842242	3.86165	47.5438	0.955121	0.139886	0.114506	98	2757.45	19	19	90.64	90.5313	0.996668	0.690838
TCGA-ER-A2NB-01A-12R-A18S-07	b46beddd-ea86-480b-a65c-aac06e3568f2	9d8a2471-74af-4bbd-be10-78ca3aac6761	SKCM	b46beddd-ea86-480b-a65c-aac06e3568f2-120124_UNC16-SN851_0124_BC0C16ACXX_3_ACTTGA	NA	NA	NA	NA	NA	NA	NA	NA	NA	NA	NA	NA	NA	NA	NA	NA	NA	NA	NA	768.781	20	20	87.96	87.96	NA	0	1	0	1	NA	1	NA	0	1	0	1	NA	1	NA	NA	NA	NA	NA	NA	NA
TCGA-ER-A2NC-06A-11R-A18T-07	11ba86c0-0d51-4873-915c-9e5552b10e77	71c7d343-4528-450f-b743-b8e7988714ea	SKCM	11ba86c0-0d51-4873-915c-9e5552b10e77-120127_UNC12-SN629_0182_BD0JFVACXX_6_ACTTGA	NA	NA	NA	NA	NA	NA	NA	NA	NA	NA	NA	NA	NA	NA	NA	NA	NA	NA	NA	NA	NA	NA	NA	NA	NA	NA	NA	NA	NA	NA	NA	NA	NA	NA	NA	NA	NA	NA	NA	NA	NA	NA	NA	NA	NA
TCGA-ER-A2ND-06A-11R-A18T-07	e2362f62-e1d2-4bcf-857e-290723d90f6e	0b0a2e4a-d939-426b-ba2f-71ad4fcb2565	SKCM	e2362f62-e1d2-4bcf-857e-290723d90f6e-120220_UNC15-SN850_0168_AD0MNAACXX_1_TAGCTT	NA	NA	NA	NA	NA	NA	NA	NA	NA	NA	NA	NA	NA	NA	NA	NA	NA	NA	NA	NA	NA	NA	NA	NA	NA	NA	NA	NA	NA	NA	NA	NA	NA	NA	NA	NA	NA	NA	NA	NA	NA	NA	NA	NA	NA
TCGA-ER-A2NE-06A-21R-A18T-07	2f738d38-7a76-4d4f-8c1f-c5ae328e977b	3cce17b1-469d-4eae-98d1-e20b472c4176	SKCM	2f738d38-7a76-4d4f-8c1f-c5ae328e977b-120118_UNC15-SN850_0163_AD0J87ACXX_2_GATCAG	NA	NA	NA	NA	NA	NA	NA	NA	NA	NA	NA	NA	NA	NA	NA	NA	NA	NA	NA	NA	NA	NA	NA	NA	NA	NA	NA	NA	NA	NA	NA	NA	NA	NA	NA	NA	NA	NA	NA	NA	NA	NA	NA	NA	NA
TCGA-ER-A2NF-01A-11R-A18T-07	ebc85b18-c95d-41ea-a03f-da971300410c	24b64a2a-72d2-49a7-b6ac-33654632b85a	SKCM	ebc85b18-c95d-41ea-a03f-da971300410c-120207_UNC10-SN254_0325_AC0C6MACXX_2_ATCACG	113.3	17	17	93.78	93.78	NA	0	1	0	1	NA	1	NA	0	1	0	1	NA	1	65292.7	17.3819	16.5928	94.8247	94.0754	0.728943	3.62271	37.439	0.930707	0.213692	0.0904642	144	0.754073	3.19283	24.3572	0.916342	0.230485	0.0904642	69	212.278	18	16.6391	94.3	92.3907	0.89822	1.2452
TCGA-ER-A2NF-06A-11R-A18T-07	3722d3e6-cddc-462b-9afa-8f08e31fb05e	55ef7beb-1c9f-47e4-805a-900b935a5d8c	SKCM	3722d3e6-cddc-462b-9afa-8f08e31fb05e-120127_UNC12-SN629_0182_BD0JFVACXX_7_ATCACG	359.154	20	20	99.075	98.6044	0.804271	0.557479	1.74626	0.370588	0.754374	0.245626	2	NA	0	1	0	1	NA	1	35997.9	16.7011	17.133	95.7449	96.1072	0.857933	3.83145	46.1294	0.965965	0.0915616	0.0858954	87	0.862781	3.34	28.2191	0.950807	0.108063	0.0995294	48	2102.93	16.3333	16.6	95.3756	95.1943	0.959464	2.10816
TCGA-ER-A2NG-06A-11R-A18T-07	579c87b3-e976-4aa0-83f3-b3c9cc2a8878	5545eb61-9b5e-4a93-964a-480597237267	SKCM	579c87b3-e976-4aa0-83f3-b3c9cc2a8878-120118_UNC15-SN850_0163_AD0J87ACXX_3_GATCAG	192.43	13	13	99.16	99.16	0.629321	0.436212	1.54684	0.265969	0.842075	0.157925	2	NA	0	1	0	1	NA	1	1494.27	16.6667	17.0819	97.4983	97.4626	0.945518	2.34952	10.4806	0.895274	0.165261	0.14614	12	0.965105	2.22224	9.22795	0.884528	0.165261	0.159917	10	NA	NA	NA	NA	NA	NA	NA
TCGA-ER-A2NH-06A-11R-A18S-07	d3a173e2-d5d1-468d-a894-13ca0b9014ad	3c286a47-d3f3-4ef8-acb5-203a6e75881c	SKCM	d3a173e2-d5d1-468d-a894-13ca0b9014ad-120201_UNC11-SN627_0181_AC0CETACXX_5_GATCAG	1177.37	16.5	16.6424	90.0733	89.8381	0.964885	1.72884	5.63412	0.812216	0.267475	0.204748	6	0.964885	1.72884	5.63412	0.812216	0.267475	0.204748	6	23122.7	17.5	17.3418	89.8521	86.9981	0.848213	3.60363	36.7312	0.954657	0.124178	0.0837649	70	0.853534	3.58885	36.1923	0.954559	0.124178	0.0837649	67	82.9093	16	16	94.3	94.3	NA	0
TCGA-ER-A3ES-06A-11R-A20F-07	c3b0048d-b2f4-4fbe-8b98-a551f3624df8	d69bc8fa-8015-46d5-a80d-4ff4cdc2eb46	SKCM	c3b0048d-b2f4-4fbe-8b98-a551f3624df8-120327_UNC13-SN749_0162_AC0LTLACXX_3_CGATGT	NA	NA	NA	NA	NA	NA	NA	NA	NA	NA	NA	NA	NA	NA	NA	NA	NA	NA	NA	NA	NA	NA	NA	NA	NA	NA	NA	NA	NA	NA	NA	NA	NA	NA	NA	NA	NA	NA	NA	NA	NA	NA	NA	NA	NA
TCGA-ER-A3ET-06A-11R-A20F-07	a854cf99-5765-497a-a257-b00b99510d88	f3320aca-c30a-4542-9778-2fd278d9bb83	SKCM	a854cf99-5765-497a-a257-b00b99510d88-130702_UNC9-SN296_0380_BC24VKACXX_6_ATCACG	NA	NA	NA	NA	NA	NA	NA	NA	NA	NA	NA	NA	NA	NA	NA	NA	NA	NA	NA	1987.96	16.5	16.3829	96.6538	95.5385	0.892543	2.83655	17.0568	0.925789	0.143891	0.13341	24	0.921653	2.55537	12.876	0.908169	0.169734	0.143891	16	NA	NA	NA	NA	NA	NA	NA
TCGA-ER-A3EV-06A-11R-A20F-07	27114fa7-f329-4a68-bab7-aa6583a505b9	88e86824-599f-4063-9977-f6db333b9b44	SKCM	27114fa7-f329-4a68-bab7-aa6583a505b9-120327_UNC13-SN749_0162_AC0LTLACXX_4_GGCTAC	313.638	20	20	96.852	97.1339	0.413183	0.664992	1.94448	0.334971	0.803959	0.121452	5	0.0866356	0.0600512	1.06189	0.0215423	0.98911	0.0108898	2	20712.4	18.6111	18.3912	96.3428	96.3566	0.671371	2.40587	11.0881	0.862228	0.23395	0.204392	36	0.550431	1.52612	4.60029	0.601214	0.611055	0.136882	16	42.9925	13	13	93.25	93.25	NA	0
TCGA-ER-A3PL-06A-11R-A239-07	2f84f446-37d8-4fc2-bd8f-cde79a0367cd	76DF8BB7-5EA9-4EEC-91F3-0AA571AA0660	SKCM	2f84f446-37d8-4fc2-bd8f-cde79a0367cd-120817_UNC9-SN296_0312_AC0WHCACXX_8_AGTTCC	NA	NA	NA	NA	NA	NA	NA	NA	NA	NA	NA	NA	NA	NA	NA	NA	NA	NA	NA	1352.6	16	21.1114	93.1	89.6498	0.380864	0.263995	1.30212	0.137136	0.925949	0.0740514	2	0.380864	0.263995	1.30212	0.137136	0.925949	0.0740514	2	NA	NA	NA	NA	NA	NA	NA
TCGA-ER-A42H-01A-11R-A24X-07	b1662651-5e48-41f1-a812-d553c7dc65ee	ee4fbf8c-8a2d-4dab-90cf-382239ab0940	SKCM	b1662651-5e48-41f1-a812-d553c7dc65ee-130128_UNC16-SN851_0207_AC1P7VACXX_1_GTCCGC	NA	NA	NA	NA	NA	NA	NA	NA	NA	NA	NA	NA	NA	NA	NA	NA	NA	NA	NA	146.923	15	15	91.34	91.34	NA	0	1	0	1	NA	1	NA	0	1	0	1	NA	1	NA	NA	NA	NA	NA	NA	NA
TCGA-ER-A42K-06A-11R-A24X-07	efcfac09-3fcb-4d36-80d4-3bca7baa65fd	8706ced2-3f6d-412e-872b-2d5c08996ee1	SKCM	efcfac09-3fcb-4d36-80d4-3bca7baa65fd-130128_UNC16-SN851_0207_AC1P7VACXX_1_GTGAAA	NA	NA	NA	NA	NA	NA	NA	NA	NA	NA	NA	NA	NA	NA	NA	NA	NA	NA	NA	300.95	16.5	16.3725	87.62	88.204	0.95256	0.660264	1.9353	0.467479	0.627517	0.372483	2	0.95256	0.660264	1.9353	0.467479	0.627517	0.372483	2	NA	NA	NA	NA	NA	NA	NA
TCGA-ER-A42L-06A-11R-A24X-07	da5311a0-f220-4b96-8a59-105900510975	935241d0-0054-4eb4-8dba-e85ca47cc100	SKCM	da5311a0-f220-4b96-8a59-105900510975-130128_UNC16-SN851_0207_AC1P7VACXX_2_CAGATC	NA	NA	NA	NA	NA	NA	NA	NA	NA	NA	NA	NA	NA	NA	NA	NA	NA	NA	NA	84057.3	20.4419	21.2533	92.0691	92.3425	0.587322	2.20904	9.10693	0.833123	0.254744	0.254744	43	0.49941	1.58715	4.8898	0.626244	0.584054	0.150869	24	NA	NA	NA	NA	NA	NA	NA
TCGA-FR-A2OS-01A-11R-A21D-07	4d163bdc-ee40-439f-a5c0-400a1fa2f14d	8d5256fb-7bc0-4e43-b0f0-f6870278039e	SKCM	4d163bdc-ee40-439f-a5c0-400a1fa2f14d-120405_UNC10-SN254_0345_AD0VAVACXX_4_CGATGT	NA	NA	NA	NA	NA	NA	NA	NA	NA	NA	NA	NA	NA	NA	NA	NA	NA	NA	NA	NA	NA	NA	NA	NA	NA	NA	NA	NA	NA	NA	NA	NA	NA	NA	NA	NA	NA	NA	NA	NA	NA	NA	NA	NA	NA
TCGA-FR-A3R1-01A-11R-A239-07	65444144-c7e1-42ef-a10b-4742016a1239	207051F1-5725-4C9B-9AC8-E4DF261B4C94	SKCM	65444144-c7e1-42ef-a10b-4742016a1239-120823_UNC14-SN744_0266_BD12TFACXX_4_CGATGT	NA	NA	NA	NA	NA	NA	NA	NA	NA	NA	NA	NA	NA	NA	NA	NA	NA	NA	NA	53519.6	17.6375	16.0968	95.029	95.2261	0.833709	3.65334	38.6033	0.958273	0.122126	0.0964158	80	0.853053	3.35406	28.6186	0.948708	0.122126	0.0970854	51	NA	NA	NA	NA	NA	NA	NA
TCGA-FR-A3YN-06A-11R-A239-07	b6b0cab7-5795-42e4-ab39-507dbb800a99	36669A48-FD56-4718-AA90-B9D39A65BB57	SKCM	b6b0cab7-5795-42e4-ab39-507dbb800a99-120823_UNC14-SN744_0266_BD12TFACXX_5_GCCAAT	54.7263	17	17	99.55	99.55	NA	0	1	0	1	NA	1	NA	0	1	0	1	NA	1	48178.8	17.9333	16.0044	96.6044	97.1341	0.700017	2.66473	14.364	0.825286	0.396603	0.063256	45	0.720463	2.60153	13.4844	0.824298	0.396603	0.063256	37	252.848	14	14	83.76	83.76	NA	0
TCGA-FR-A3YO-06A-11R-A239-07	0704e4cd-cb79-4235-852d-aa0e0c0715c5	F787B8FD-80DA-4103-9102-18B08DF2BF58	SKCM	0704e4cd-cb79-4235-852d-aa0e0c0715c5-120823_UNC14-SN744_0266_BD12TFACXX_5_CTTGTA	NA	NA	NA	NA	NA	NA	NA	NA	NA	NA	NA	NA	NA	NA	NA	NA	NA	NA	NA	NA	NA	NA	NA	NA	NA	NA	NA	NA	NA	NA	NA	NA	NA	NA	NA	NA	NA	NA	NA	NA	NA	NA	NA	NA	NA
TCGA-FR-A44A-06A-11R-A24X-07	f60b4751-e821-470e-b18e-d18888fd0797	03a38948-5a2d-4451-8103-12f6e0cf4984	SKCM	f60b4751-e821-470e-b18e-d18888fd0797-130128_UNC16-SN851_0207_AC1P7VACXX_4_CTTGTA	NA	NA	NA	NA	NA	NA	NA	NA	NA	NA	NA	NA	NA	NA	NA	NA	NA	NA	NA	15665.2	19.8125	22.3834	95.0738	95.5152	0.532896	1.4775	4.38198	0.558845	0.654282	0.070464	16	0.542828	1.47	4.34926	0.558719	0.654282	0.070464	15	NA	NA	NA	NA	NA	NA	NA
TCGA-FR-A69P-06A-21R-A311-07	6f7de9b0-748f-4e8c-96cc-2664cefe3a4b	2d65394f-fb80-49ef-9f3e-f37f77ac404f	SKCM	6f7de9b0-748f-4e8c-96cc-2664cefe3a4b-130722_UNC9-SN296_0385_AD2F28ACXX_5_GATCAG	NA	NA	NA	NA	NA	NA	NA	NA	NA	NA	NA	NA	NA	NA	NA	NA	NA	NA	NA	NA	NA	NA	NA	NA	NA	NA	NA	NA	NA	NA	NA	NA	NA	NA	NA	NA	NA	NA	NA	NA	NA	NA	NA	NA	NA
TCGA-FR-A726-01A-11R-A32P-07	e39a9115-8756-4ae9-8618-a20029b87657	327c179d-b8d0-4e9b-9e0a-54d1b2e649b2	SKCM	e39a9115-8756-4ae9-8618-a20029b87657-131015_UNC11-SN627_0327_AC2ND3ACXX_4_TGACCA	NA	NA	NA	NA	NA	NA	NA	NA	NA	NA	NA	NA	NA	NA	NA	NA	NA	NA	NA	NA	NA	NA	NA	NA	NA	NA	NA	NA	NA	NA	NA	NA	NA	NA	NA	NA	NA	NA	NA	NA	NA	NA	NA	NA	NA
TCGA-FR-A728-01A-11R-A32P-07	6464bcdb-ed86-4d3f-bfe0-327544069790	9072817e-8a67-4f62-a0a6-8afc42b7037b	SKCM	6464bcdb-ed86-4d3f-bfe0-327544069790-131015_UNC11-SN627_0327_AC2ND3ACXX_5_CAGATC	NA	NA	NA	NA	NA	NA	NA	NA	NA	NA	NA	NA	NA	NA	NA	NA	NA	NA	NA	NA	NA	NA	NA	NA	NA	NA	NA	NA	NA	NA	NA	NA	NA	NA	NA	NA	NA	NA	NA	NA	NA	NA	NA	NA	NA
TCGA-FR-A729-06A-11R-A352-07	9dec4181-def8-4988-91b8-8d027df94243	1b01e4e9-83b9-4bb0-8bef-c6e5d8c78280	SKCM	9dec4181-def8-4988-91b8-8d027df94243-140304_UNC14-SN744_0400_AC3LWGACXX_5_CCGTCC	1239.24	17.1429	17.5375	88.8014	88.6671	0.930072	1.80984	6.10945	0.814049	0.301138	0.214341	7	0.930072	1.80984	6.10945	0.814049	0.301138	0.214341	7	19109.2	17.381	17.2832	97.3154	97.5288	0.878839	3.64115	38.1356	0.961877	0.101905	0.0793496	63	0.910354	3.44495	31.3417	0.957409	0.104993	0.0793496	44	NA	NA	NA	NA	NA	NA	NA
TCGA-FR-A7U8-06A-21R-A352-07	be4ee999-f8c2-48e4-8f78-e84f51e72403	f62984d7-b596-4417-a435-c02076d116cc	SKCM	be4ee999-f8c2-48e4-8f78-e84f51e72403-140304_UNC14-SN744_0400_AC3LWGACXX_6_TTAGGC	NA	NA	NA	NA	NA	NA	NA	NA	NA	NA	NA	NA	NA	NA	NA	NA	NA	NA	NA	NA	NA	NA	NA	NA	NA	NA	NA	NA	NA	NA	NA	NA	NA	NA	NA	NA	NA	NA	NA	NA	NA	NA	NA	NA	NA
TCGA-FR-A7U9-06A-11R-A352-07	6f9ec4fc-b9ca-473b-b37a-1486869da8ef	48b5606d-060d-4026-a899-4c4f9bfe64f9	SKCM	6f9ec4fc-b9ca-473b-b37a-1486869da8ef-140304_UNC14-SN744_0400_AC3LWGACXX_6_GTCCGC	3667.71	15.7143	14.4627	96.4843	97.4649	0.389374	0.757686	2.13333	0.355242	0.791152	0.130091	7	0.411293	0.661951	1.93857	0.345629	0.791152	0.16677	5	12858	16.6279	16.9683	98.6914	97.9753	0.819468	3.08218	21.8059	0.933651	0.157625	0.0910358	43	0.830369	2.7961	16.3806	0.904956	0.238551	0.0910358	29	53.2168	20	20	100	100	NA	0
TCGA-FR-A7UA-06A-32R-A352-07	601d6a1c-bac9-48a6-aa1b-0a92e3c2af25	adb4622b-d3a2-414a-83a9-57ac28c52a7f	SKCM	601d6a1c-bac9-48a6-aa1b-0a92e3c2af25-140312_UNC15-SN850_0357_AC3M7FACXX_8_ATCACG	NA	NA	NA	NA	NA	NA	NA	NA	NA	NA	NA	NA	NA	NA	NA	NA	NA	NA	NA	175323	16.7821	15.6837	98.3674	97.6781	0.757514	3.82534	45.8483	0.958369	0.11837	0.101367	156	0.823826	3.61003	36.9671	0.95478	0.119132	0.103095	80	502.21	20	20	100	100	NA	0
TCGA-FR-A8YC-06A-11R-A37K-07	9ee57cad-1675-45a8-a74d-6c6a21632fd1	a696be4d-8576-43a3-8137-30778dff9b89	SKCM	9ee57cad-1675-45a8-a74d-6c6a21632fd1-140424_UNC12-SN629_0365_AC4368ACXX_2_CCGTCC	NA	NA	NA	NA	NA	NA	NA	NA	NA	NA	NA	NA	NA	NA	NA	NA	NA	NA	NA	7947.83	18.4545	17.353	97.2014	96.1107	0.755434	2.33508	10.3303	0.853251	0.308	0.143602	22	0.818662	2.21698	9.17955	0.847195	0.308	0.155992	15	NA	NA	NA	NA	NA	NA	NA
TCGA-FR-A8YD-06A-11R-A37K-07	ab03d1d9-36bb-4023-82b0-27ddb09e9d0e	72f09d56-23d1-4cd8-9312-52ea1dfd94c8	SKCM	ab03d1d9-36bb-4023-82b0-27ddb09e9d0e-140416_UNC15-SN850_0361_AC41LKACXX_3_ACTTGA	NA	NA	NA	NA	NA	NA	NA	NA	NA	NA	NA	NA	NA	NA	NA	NA	NA	NA	NA	5043.64	17.5556	18.002	95.7211	96.244	0.869509	2.5132	12.3444	0.890025	0.22448	0.160181	18	0.89272	2.35594	10.548	0.879031	0.22448	0.172953	14	717.133	21.3333	21.5998	94.3867	94.2396	0.968106	1.73461
TCGA-FR-A8YE-06A-11R-A37K-07	84e85c08-aa75-421a-b891-645a4191e7ca	5e9cd2f3-9d5e-4a76-88ab-4928c712981f	SKCM	84e85c08-aa75-421a-b891-645a4191e7ca-140416_UNC15-SN850_0361_AC41LKACXX_4_ACTGAT	1974.88	17.7	18.8353	88.227	87.6533	0.931025	2.14376	8.53149	0.867283	0.206209	0.179523	10	0.931025	2.14376	8.53149	0.867283	0.206209	0.179523	10	6085.53	18.1765	18.1905	89.8253	89.7162	0.758094	2.14784	8.56636	0.826387	0.302468	0.231619	17	0.742417	2.0105	7.46706	0.811539	0.302468	0.231619	15	NA	NA	NA	NA	NA	NA	NA
TCGA-FS-A1YW-06A-11R-A18T-07	089027ee-6638-4524-956c-6ff94407e1e1	5d1230b6-ab63-417c-bf40-de9316043024	SKCM	089027ee-6638-4524-956c-6ff94407e1e1-120124_UNC16-SN851_0124_BC0C16ACXX_3_GGCTAC	124.139	17	18.2596	93.54	93.4871	0.953721	0.661069	1.93686	0.468267	0.625963	0.374037	2	0.953721	0.661069	1.93686	0.468267	0.625963	0.374037	2	1292.51	17.625	17.286	90.8388	90.1266	0.970613	2.01833	7.52577	0.858456	0.220282	0.172962	8	0.970613	2.01833	7.52577	0.858456	0.220282	0.172962	8	NA	NA	NA	NA	NA	NA	NA
TCGA-FS-A1YX-06A-11R-A18T-07	1b87ab60-e82f-4513-8d96-e37c1b833a82	789ad7d7-2428-4ca2-a05f-0930b093e1d8	SKCM	1b87ab60-e82f-4513-8d96-e37c1b833a82-120124_UNC16-SN851_0123_AC0FDJACXX_5_TAGCTT	NA	NA	NA	NA	NA	NA	NA	NA	NA	NA	NA	NA	NA	NA	NA	NA	NA	NA	NA	282.258	19	19	88.13	88.13	NA	0	1	0	1	NA	1	NA	0	1	0	1	NA	1	NA	NA	NA	NA	NA	NA	NA
TCGA-FS-A1YY-06A-11R-A18T-07	356058ff-dcad-41bb-b069-4c2b028d185e	1fbac9dc-90e1-4421-a65d-292ddbad0b4e	SKCM	356058ff-dcad-41bb-b069-4c2b028d185e-120124_UNC16-SN851_0123_AC0FDJACXX_8_CTTGTA	NA	NA	NA	NA	NA	NA	NA	NA	NA	NA	NA	NA	NA	NA	NA	NA	NA	NA	NA	NA	NA	NA	NA	NA	NA	NA	NA	NA	NA	NA	NA	NA	NA	NA	NA	NA	NA	NA	NA	NA	NA	NA	NA	NA	NA
TCGA-FS-A1Z0-06A-11R-A18T-07	d84cad27-8e3f-4694-b9f3-5a6773c1e560	020f448b-0242-4ff7-912a-4598d0b49055	SKCM	d84cad27-8e3f-4694-b9f3-5a6773c1e560-120207_UNC10-SN254_0325_AC0C6MACXX_2_ACTTGA	167.365	14	14	94.87	94.87	NA	0	1	0	1	NA	1	NA	0	1	0	1	NA	1	24853.7	17.0625	15.5877	94.7903	94.4815	0.765356	2.65252	14.1898	0.894271	0.214167	0.16795	32	0.792001	2.54935	12.7988	0.887338	0.214167	0.186402	25	122.605	15	15	93.07	93.07	NA	0
TCGA-FS-A1Z3-06A-11R-A18T-07	3aaee4c2-d503-47f0-a619-c18325f060de	22b2c106-e714-4289-bdfc-a9933f055023	SKCM	3aaee4c2-d503-47f0-a619-c18325f060de-120220_UNC15-SN850_0168_AD0MNAACXX_2_ACTTGA	NA	NA	NA	NA	NA	NA	NA	NA	NA	NA	NA	NA	NA	NA	NA	NA	NA	NA	NA	NA	NA	NA	NA	NA	NA	NA	NA	NA	NA	NA	NA	NA	NA	NA	NA	NA	NA	NA	NA	NA	NA	NA	NA	NA	NA
TCGA-FS-A1Z4-06A-11R-A18T-07	b147b0d3-581c-4556-ab56-a2152695f51b	a6d27c0b-24c5-4633-a6d1-3f7f6c8525fd	SKCM	b147b0d3-581c-4556-ab56-a2152695f51b-120201_UNC11-SN627_0181_AC0CETACXX_5_GGCTAC	6233.91	17.6364	20.4278	95.9927	97.3706	0.800557	2.47456	11.8764	0.860102	0.315244	0.124903	22	0.803204	2.40618	11.0916	0.851549	0.328299	0.124903	20	75498.1	18.0734	18.2534	96.3705	95.4962	0.897642	4.83335	125.631	0.987633	0.0494365	0.0344671	218	0.906157	4.45828	86.3385	0.981618	0.0595523	0.0500993	137	261.66	18.5	18.6568	93.84	92.0493	0.927841	0.643131
TCGA-FS-A1Z7-06A-11R-A18T-07	cdabe7b8-7dea-4423-ab96-3dcd2d14308c	4673424c-68f8-4ee3-aacc-926e4a32c2be	SKCM	cdabe7b8-7dea-4423-ab96-3dcd2d14308c-120127_UNC12-SN629_0182_BD0JFVACXX_7_GCCAAT	NA	NA	NA	NA	NA	NA	NA	NA	NA	NA	NA	NA	NA	NA	NA	NA	NA	NA	NA	211.001	22	22	95.24	95.24	NA	0	1	0	1	NA	1	NA	0	1	0	1	NA	1	NA	NA	NA	NA	NA	NA	NA
TCGA-FS-A1ZA-06A-11R-A18T-07	17de2618-f75f-431c-8233-e4773a77d330	16568b2b-562c-4f74-b1b9-a3888d6dfc04	SKCM	17de2618-f75f-431c-8233-e4773a77d330-120118_UNC15-SN850_0163_AD0J87ACXX_4_GATCAG	308.438	16	16	86.4	86.4	NA	0	1	0	1	NA	1	NA	0	1	0	1	NA	1	33731.5	16.6557	17.403	96.2723	96.0805	0.78892	3.24315	25.6143	0.937643	0.113263	0.104622	61	0.829249	3.11897	22.6231	0.933797	0.119145	0.110694	43	3373.59	14.2857	14.4427	95.1157	96.6106	0.710299	1.38218
TCGA-FS-A1ZB-06A-12R-A18S-07	f33a83cc-639c-4e30-a806-b6e08b56e5ae	67bb0e7f-a5f6-44c4-b5d4-6566094de00a	SKCM	f33a83cc-639c-4e30-a806-b6e08b56e5ae-120201_UNC11-SN627_0181_AC0CETACXX_6_TAGCTT	NA	NA	NA	NA	NA	NA	NA	NA	NA	NA	NA	NA	NA	NA	NA	NA	NA	NA	NA	112.595	18	18	90.99	90.99	NA	0	1	0	1	NA	1	NA	0	1	0	1	NA	1	NA	NA	NA	NA	NA	NA	NA
TCGA-FS-A1ZC-06A-11R-A18T-07	1d596b28-60a4-461a-ad3f-d74f9e5b4860	ecef38b8-540b-4b38-b0e5-46479bc30eb6	SKCM	1d596b28-60a4-461a-ad3f-d74f9e5b4860-120220_UNC15-SN850_0168_AD0MNAACXX_2_GATCAG	NA	NA	NA	NA	NA	NA	NA	NA	NA	NA	NA	NA	NA	NA	NA	NA	NA	NA	NA	NA	NA	NA	NA	NA	NA	NA	NA	NA	NA	NA	NA	NA	NA	NA	NA	NA	NA	NA	NA	NA	NA	NA	NA	NA	NA
TCGA-FS-A1ZD-06A-11R-A18T-07	030809ad-2009-424d-be47-7184c72393e1	0ca8b8b7-f805-4c2a-834d-01790c9d7504	SKCM	030809ad-2009-424d-be47-7184c72393e1-120207_UNC10-SN254_0325_AC0C6MACXX_3_ACTTGA	NA	NA	NA	NA	NA	NA	NA	NA	NA	NA	NA	NA	NA	NA	NA	NA	NA	NA	NA	NA	NA	NA	NA	NA	NA	NA	NA	NA	NA	NA	NA	NA	NA	NA	NA	NA	NA	NA	NA	NA	NA	NA	NA	NA	NA
TCGA-FS-A1ZE-06A-11R-A18T-07	37f08c18-306c-49fc-8369-270aac9c6d94	3267f325-3689-4fe6-b539-44678ba7dd84	SKCM	37f08c18-306c-49fc-8369-270aac9c6d94-120207_UNC10-SN254_0325_AC0C6MACXX_3_ACAGTG	NA	NA	NA	NA	NA	NA	NA	NA	NA	NA	NA	NA	NA	NA	NA	NA	NA	NA	NA	NA	NA	NA	NA	NA	NA	NA	NA	NA	NA	NA	NA	NA	NA	NA	NA	NA	NA	NA	NA	NA	NA	NA	NA	NA	NA
TCGA-FS-A1ZF-06A-12R-A18S-07	cd0a95e4-f3b7-49f4-ae7d-759902a75a1d	589feea4-d8ea-4c3f-9d63-367ba1488465	SKCM	cd0a95e4-f3b7-49f4-ae7d-759902a75a1d-120201_UNC11-SN627_0181_AC0CETACXX_7_ACTTGA	NA	NA	NA	NA	NA	NA	NA	NA	NA	NA	NA	NA	NA	NA	NA	NA	NA	NA	NA	NA	NA	NA	NA	NA	NA	NA	NA	NA	NA	NA	NA	NA	NA	NA	NA	NA	NA	NA	NA	NA	NA	NA	NA	NA	NA
TCGA-FS-A1ZG-06A-11R-A18T-07	d7c5d4bd-5faa-4e76-9a1f-020b304ac6b6	40cd8ac3-db5e-4295-9dbd-d891885cead5	SKCM	d7c5d4bd-5faa-4e76-9a1f-020b304ac6b6-120124_UNC16-SN851_0124_BC0C16ACXX_5_CTTGTA	NA	NA	NA	NA	NA	NA	NA	NA	NA	NA	NA	NA	NA	NA	NA	NA	NA	NA	NA	NA	NA	NA	NA	NA	NA	NA	NA	NA	NA	NA	NA	NA	NA	NA	NA	NA	NA	NA	NA	NA	NA	NA	NA	NA	NA
TCGA-FS-A1ZH-06A-11R-A18T-07	02574a77-21ce-43c0-9563-192b6fd13701	b295bda8-db61-49c4-912c-5c1f987e9d53	SKCM	02574a77-21ce-43c0-9563-192b6fd13701-120124_UNC16-SN851_0124_BC0C16ACXX_6_CTTGTA	16184.5	18.0833	18.3184	91.2092	90.3431	0.908343	3.25507	25.9213	0.949317	0.127445	0.0781815	36	0.908343	3.25507	25.9213	0.949317	0.127445	0.0781815	36	56754.8	18.7831	18.8679	91.0128	91.4764	0.846412	3.74016	42.1047	0.961349	0.0980466	0.090709	83	0.85991	3.67755	39.5493	0.96043	0.0980466	0.090709	72	255.709	17	17	92	92	NA	0
TCGA-FS-A1ZJ-06A-12R-A18S-07	9bc8a3d1-09fe-4b8b-9fa7-cf39464608d1	9beb01e0-62e4-4103-9a7c-f967fdb06608	SKCM	9bc8a3d1-09fe-4b8b-9fa7-cf39464608d1-111122_UNC16-SN851_0111_BD09J2ACXX_3_TAGCTT	NA	NA	NA	NA	NA	NA	NA	NA	NA	NA	NA	NA	NA	NA	NA	NA	NA	NA	NA	661.819	22	22	94.29	94.29	NA	0	1	0	1	NA	1	NA	0	1	0	1	NA	1	NA	NA	NA	NA	NA	NA	NA
TCGA-FS-A1ZK-06A-11R-A18T-07	fc09a2b9-b0da-4dc0-80c8-206f3f9441e7	d17f1df8-d3de-4a01-930c-a066942e9fe4	SKCM	fc09a2b9-b0da-4dc0-80c8-206f3f9441e7-120124_UNC16-SN851_0124_BC0C16ACXX_5_TAGCTT	NA	NA	NA	NA	NA	NA	NA	NA	NA	NA	NA	NA	NA	NA	NA	NA	NA	NA	NA	NA	NA	NA	NA	NA	NA	NA	NA	NA	NA	NA	NA	NA	NA	NA	NA	NA	NA	NA	NA	NA	NA	NA	NA	NA	NA
TCGA-FS-A1ZM-06A-12R-A18S-07	d477af7d-6ac1-4949-a708-a2f844c71ccb	fd452f28-1ef9-4582-b31b-9ce98dc7a114	SKCM	d477af7d-6ac1-4949-a708-a2f844c71ccb-120201_UNC11-SN627_0181_AC0CETACXX_7_GATCAG	NA	NA	NA	NA	NA	NA	NA	NA	NA	NA	NA	NA	NA	NA	NA	NA	NA	NA	NA	105.224	21	21	84.51	84.51	NA	0	1	0	1	NA	1	NA	0	1	0	1	NA	1	NA	NA	NA	NA	NA	NA	NA
TCGA-FS-A1ZN-01A-11R-A18T-07	b6242a5d-4d29-4b78-92e2-3701449ccbd4	96541be7-77b9-4859-9762-c439f22e6c4a	SKCM	b6242a5d-4d29-4b78-92e2-3701449ccbd4-120220_UNC15-SN850_0168_AD0MNAACXX_3_ACAGTG	NA	NA	NA	NA	NA	NA	NA	NA	NA	NA	NA	NA	NA	NA	NA	NA	NA	NA	NA	373.524	21	21	91.98	91.98	NA	0	1	0	1	NA	1	NA	0	1	0	1	NA	1	NA	NA	NA	NA	NA	NA	NA
TCGA-FS-A1ZP-06A-11R-A18T-07	cae03431-3985-403e-ab72-e8cd232bea88	c970e2a6-4393-4641-9eea-33a022e23c53	SKCM	cae03431-3985-403e-ab72-e8cd232bea88-120127_UNC12-SN629_0182_BD0JFVACXX_8_TTAGGC	1205.78	16	16	94.3	94.3	NA	0	1	0	1	NA	1	NA	0	1	0	1	NA	1	1161.27	16.25	16.1733	94.75	95.889	0.928876	1.28769	3.62442	0.69679	0.441638	0.21777	4	0.928876	1.28769	3.62442	0.69679	0.441638	0.21777	4	NA	NA	NA	NA	NA	NA	NA
TCGA-FS-A1ZQ-06A-11R-A18U-07	7cce518f-d488-4b0b-be5e-78d539bc24b3	6ec8e49a-35db-469e-9e7a-0d8cdfcc0607	SKCM	7cce518f-d488-4b0b-be5e-78d539bc24b3-120308_UNC15-SN850_0174_BC0EUKACXX_5_ACAGTG	1235.99	16.75	17.4317	91.455	91.7918	0.937552	1.29972	3.66828	0.711065	0.373895	0.286967	4	0.937552	1.29972	3.66828	0.711065	0.373895	0.286967	4	3670.71	19.2	20.1467	93.4913	93.6105	0.934247	2.52999	12.5534	0.906648	0.164655	0.131839	15	0.934247	2.52999	12.5534	0.906648	0.164655	0.131839	15	478.111	22	22	96.19	96.19	NA	0
TCGA-FS-A1ZR-06A-21R-A18U-07	576484a1-a8a9-4225-9218-dfe276f63287	c67a7631-4bbf-4bee-9743-0e470d0bdf86	SKCM	576484a1-a8a9-4225-9218-dfe276f63287-120308_UNC15-SN850_0174_BC0EUKACXX_6_GCCAAT	NA	NA	NA	NA	NA	NA	NA	NA	NA	NA	NA	NA	NA	NA	NA	NA	NA	NA	NA	761.09	18.25	16.8344	97.2125	96.7576	0.677698	0.939488	2.55867	0.513385	0.656947	0.201304	4	0.797033	0.875631	2.40039	0.507805	0.656947	0.201304	3	NA	NA	NA	NA	NA	NA	NA
TCGA-FS-A1ZS-06A-12R-A18T-07	b2a853ad-87dc-4dde-aed6-984089bd6eb4	4bf69802-8bd2-4463-8c33-cf5360bf0262	SKCM	b2a853ad-87dc-4dde-aed6-984089bd6eb4-120207_UNC10-SN254_0325_AC0C6MACXX_4_ATCACG	NA	NA	NA	NA	NA	NA	NA	NA	NA	NA	NA	NA	NA	NA	NA	NA	NA	NA	NA	NA	NA	NA	NA	NA	NA	NA	NA	NA	NA	NA	NA	NA	NA	NA	NA	NA	NA	NA	NA	NA	NA	NA	NA	NA	NA
TCGA-FS-A1ZT-06A-11R-A18U-07	be5a87b6-57bb-47ee-b199-12cd4c621a42	31f009cc-8211-45db-b74b-416bab8c30df	SKCM	be5a87b6-57bb-47ee-b199-12cd4c621a42-120308_UNC15-SN850_0174_BC0EUKACXX_7_GATCAG	3910.07	17.3333	10.5239	91.175	90.8589	0.452427	0.810641	2.24935	0.423281	0.73027	0.204949	6	0.452427	0.810641	2.24935	0.423281	0.73027	0.204949	6	183788	18.5353	18.5698	90.6958	91.3878	0.801197	4.11479	61.2392	0.968183	0.119872	0.0503829	170	0.831762	4.00933	55.1098	0.966735	0.122784	0.0505032	124	NA	NA	NA	NA	NA	NA	NA
TCGA-FS-A1ZU-06A-12R-A18T-07	69846147-1ea6-47f5-b687-60d985b9362f	23f183f4-735e-4361-940c-e09edd6f2d2a	SKCM	69846147-1ea6-47f5-b687-60d985b9362f-120124_UNC16-SN851_0124_BC0C16ACXX_4_GGCTAC	NA	NA	NA	NA	NA	NA	NA	NA	NA	NA	NA	NA	NA	NA	NA	NA	NA	NA	NA	NA	NA	NA	NA	NA	NA	NA	NA	NA	NA	NA	NA	NA	NA	NA	NA	NA	NA	NA	NA	NA	NA	NA	NA	NA	NA
TCGA-FS-A1ZW-06A-12R-A18T-07	f949ea83-efda-4b78-ae6c-32c2ad2b6054	ce894d3c-c781-4e3a-a32c-1b3f85c84df3	SKCM	f949ea83-efda-4b78-ae6c-32c2ad2b6054-120127_UNC12-SN629_0182_BD0JFVACXX_8_CTTGTA	1427.65	20.3333	21.4064	91.215	92.9072	0.800393	1.9889	7.30751	0.827447	0.292352	0.195945	12	0.947057	1.6969	5.45699	0.802285	0.292352	0.195945	6	401548	17.4373	17.6738	97.0776	97.0797	0.683911	4.10949	60.9158	0.953703	0.176115	0.0615991	407	0.76835	3.59751	36.5073	0.941263	0.198059	0.0707872	108	131175	15.2927	14.955	97.8694	99.2872	0.304372	1.34128
TCGA-FS-A1ZY-06A-11R-A18S-07	17ad8bab-a811-48b4-a432-85255d0eb187	390a7d6b-023d-4895-9b5c-f65bbb628ff1	SKCM	17ad8bab-a811-48b4-a432-85255d0eb187-120201_UNC11-SN627_0181_AC0CETACXX_8_ATCACG	NA	NA	NA	NA	NA	NA	NA	NA	NA	NA	NA	NA	NA	NA	NA	NA	NA	NA	NA	NA	NA	NA	NA	NA	NA	NA	NA	NA	NA	NA	NA	NA	NA	NA	NA	NA	NA	NA	NA	NA	NA	NA	NA	NA	NA
TCGA-FS-A1ZZ-06A-11R-A18S-07	baeccefe-c9a4-4ce9-902b-d36973965f16	c209a152-e7e3-4960-8ad6-781f9da74542	SKCM	baeccefe-c9a4-4ce9-902b-d36973965f16-120201_UNC11-SN627_0181_AC0CETACXX_8_GATCAG	NA	NA	NA	NA	NA	NA	NA	NA	NA	NA	NA	NA	NA	NA	NA	NA	NA	NA	NA	4576.2	17.1304	17.5649	93.8087	93.3229	0.949047	2.97573	19.604	0.941344	0.113977	0.102675	23	0.928478	2.73385	15.392	0.919764	0.172664	0.113977	19	NA	NA	NA	NA	NA	NA	NA
TCGA-FS-A4F0-06A-11R-A24X-07	951205f0-4db4-4b15-bad4-6b5a55fbf6d7	2d882bfb-7efe-404c-8431-3cbfe3957ee0	SKCM	951205f0-4db4-4b15-bad4-6b5a55fbf6d7-130128_UNC16-SN851_0207_AC1P7VACXX_4_AGTCAA	NA	NA	NA	NA	NA	NA	NA	NA	NA	NA	NA	NA	NA	NA	NA	NA	NA	NA	NA	NA	NA	NA	NA	NA	NA	NA	NA	NA	NA	NA	NA	NA	NA	NA	NA	NA	NA	NA	NA	NA	NA	NA	NA	NA	NA
TCGA-FS-A4F2-06A-11R-A24X-07	7da27cc4-9962-4415-9748-7579b83a8b8b	12a67d85-e880-4c38-9987-1f25741b5968	SKCM	7da27cc4-9962-4415-9748-7579b83a8b8b-130128_UNC16-SN851_0207_AC1P7VACXX_5_AGTTCC	NA	NA	NA	NA	NA	NA	NA	NA	NA	NA	NA	NA	NA	NA	NA	NA	NA	NA	NA	NA	NA	NA	NA	NA	NA	NA	NA	NA	NA	NA	NA	NA	NA	NA	NA	NA	NA	NA	NA	NA	NA	NA	NA	NA	NA
TCGA-FS-A4F4-06A-12R-A266-07	0556b68e-a097-4d6f-b337-0554293ffab4	d982be0f-c01a-403f-8cb0-b868e07b918d	SKCM	0556b68e-a097-4d6f-b337-0554293ffab4-130503_UNC9-SN296_0361_AC23VLACXX_4_GATCAG	NA	NA	NA	NA	NA	NA	NA	NA	NA	NA	NA	NA	NA	NA	NA	NA	NA	NA	NA	NA	NA	NA	NA	NA	NA	NA	NA	NA	NA	NA	NA	NA	NA	NA	NA	NA	NA	NA	NA	NA	NA	NA	NA	NA	NA
TCGA-FS-A4F5-06A-11R-A266-07	56ff6499-0cc1-4108-aeb5-68ad6e371df3	835b36a5-39ab-4c39-ae0a-50d235b19b93	SKCM	56ff6499-0cc1-4108-aeb5-68ad6e371df3-130503_UNC9-SN296_0361_AC23VLACXX_4_GTTTCG	NA	NA	NA	NA	NA	NA	NA	NA	NA	NA	NA	NA	NA	NA	NA	NA	NA	NA	NA	NA	NA	NA	NA	NA	NA	NA	NA	NA	NA	NA	NA	NA	NA	NA	NA	NA	NA	NA	NA	NA	NA	NA	NA	NA	NA
TCGA-FS-A4F8-06A-11R-A266-07	91b61c25-e966-4c03-a71b-9be9e39f8465	aa805078-cbab-4f1a-ac2e-86ab4eb6e9c4	SKCM	91b61c25-e966-4c03-a71b-9be9e39f8465-130423_UNC11-SN627_0293_AC23BAACXX_8_TTAGGC	11688.5	18.3725	18.7911	89.1175	88.8733	0.920825	3.62052	37.3572	0.96473	0.101849	0.0569901	51	0.915948	3.46612	32.0123	0.952174	0.160415	0.0528249	44	17188.6	18.5	17.5346	90.1607	89.2262	0.839562	3.17706	23.9762	0.931957	0.153082	0.151838	44	0.825976	3.02601	20.6149	0.921606	0.178266	0.153082	39	NA	NA	NA	NA	NA	NA	NA
TCGA-FS-A4F9-06A-11R-A24X-07	19d383b0-cbf1-4e1b-a17e-332e96f18fd7	a44ecade-befb-4514-9873-03c70438d9c7	SKCM	19d383b0-cbf1-4e1b-a17e-332e96f18fd7-130128_UNC16-SN851_0207_AC1P7VACXX_5_ATGTCA	652.566	20.3333	19.8859	87.0267	87.3006	0.985291	1.08245	2.95191	0.655633	0.416399	0.310289	3	0.985291	1.08245	2.95191	0.655633	0.416399	0.310289	3	927.441	24	24	93.14	93.14	NA	0	1	0	1	NA	1	NA	0	1	0	1	NA	1	NA	NA	NA	NA	NA	NA	NA
TCGA-FS-A4FB-06A-11R-A266-07	bc939517-e335-47ca-82f9-98c580f302be	f97b34e3-6933-4ab5-8e7a-2f4ea4da27ff	SKCM	bc939517-e335-47ca-82f9-98c580f302be-130423_UNC11-SN627_0293_AC23BAACXX_8_GGCTAC	NA	NA	NA	NA	NA	NA	NA	NA	NA	NA	NA	NA	NA	NA	NA	NA	NA	NA	NA	NA	NA	NA	NA	NA	NA	NA	NA	NA	NA	NA	NA	NA	NA	NA	NA	NA	NA	NA	NA	NA	NA	NA	NA	NA	NA
TCGA-FS-A4FC-06A-11R-A24X-07	7f070971-a2f2-4610-b47a-6018b6f541d7	9aca1f40-cecc-41ca-9a4c-1dd79edec185	SKCM	7f070971-a2f2-4610-b47a-6018b6f541d7-130128_UNC16-SN851_0207_AC1P7VACXX_6_CCGTCC	NA	NA	NA	NA	NA	NA	NA	NA	NA	NA	NA	NA	NA	NA	NA	NA	NA	NA	NA	2776.88	20.5	21.5658	94.5117	96.5051	0.794563	1.42366	4.15231	0.695984	0.471774	0.226064	6	0.794563	1.42366	4.15231	0.695984	0.471774	0.226064	6	NA	NA	NA	NA	NA	NA	NA
TCGA-FS-A4FD-06A-11R-A266-07	a1fa96bb-dd0e-4d8d-8305-f7f8c342470c	0a760a83-c33d-4aa6-bbbb-3dc330d376f7	SKCM	a1fa96bb-dd0e-4d8d-8305-f7f8c342470c-130503_UNC9-SN296_0361_AC23VLACXX_5_GTTTCG	NA	NA	NA	NA	NA	NA	NA	NA	NA	NA	NA	NA	NA	NA	NA	NA	NA	NA	NA	5371.44	15.9091	16.5125	98.9655	97.893	0.577295	1.38429	3.992	0.650224	0.498138	0.305744	11	0.549677	0.98489	2.67752	0.532787	0.609698	0.305744	6	NA	NA	NA	NA	NA	NA	NA
TCGA-FW-A3I3-06A-11R-A21D-07	9c17e3c5-2243-402e-91a1-d5ee7e36821f	13dd0afe-2ac9-4a9a-a7f1-a807dc33a787	SKCM	9c17e3c5-2243-402e-91a1-d5ee7e36821f-120405_UNC10-SN254_0345_AD0VAVACXX_4_GGCTAC	135.375	7	7	100	100	NA	0	1	0	1	NA	1	NA	0	1	0	1	NA	1	1200.53	26	26	99.49	99.49	NA	0	1	0	1	NA	1	NA	0	1	0	1	NA	1	NA	NA	NA	NA	NA	NA	NA
TCGA-FW-A3R5-06A-11R-A239-07	a701dba0-17bb-4b22-8dcb-2a4f173bcd0d	2A382958-2B06-4F44-8E21-E2A5BF2F5D15	SKCM	a701dba0-17bb-4b22-8dcb-2a4f173bcd0d-120823_UNC14-SN744_0266_BD12TFACXX_6_ACAGTG	NA	NA	NA	NA	NA	NA	NA	NA	NA	NA	NA	NA	NA	NA	NA	NA	NA	NA	NA	3575.54	18.1905	19.7919	98.9114	98.3081	0.752981	2.29247	9.89935	0.855247	0.283063	0.164774	21	0.819671	1.70446	5.4984	0.779263	0.320132	0.285207	8	NA	NA	NA	NA	NA	NA	NA
TCGA-FW-A3TU-06A-11R-A239-07	56d3ce5f-1aa2-4e39-bc41-b33f5306d169	45B849C2-A006-4B63-90FF-206182DFC5A3	SKCM	56d3ce5f-1aa2-4e39-bc41-b33f5306d169-120823_UNC14-SN744_0266_BD12TFACXX_7_CGATGT	7196.49	16.25	16.7075	88.4879	89.9925	0.910548	2.89377	18.0613	0.92948	0.166611	0.09336	24	0.932836	2.84004	17.1164	0.928355	0.166611	0.09336	21	21771.1	18.8462	18.8972	90.4677	89.0641	0.877663	3.66371	39.0057	0.961405	0.094648	0.0858989	65	0.892534	3.57668	35.7547	0.959746	0.094648	0.0858989	55	1119.77	11.8	11.9009	92.37	92.2463	0.81836	1.3171
TCGA-FW-A3TV-06A-11R-A239-07	64a6ccda-a25e-41a6-9109-a168e08eb114	204579EC-D4C2-4A36-9231-F0C82F62DE12	SKCM	64a6ccda-a25e-41a6-9109-a168e08eb114-120823_UNC14-SN744_0266_BD12TFACXX_7_GCCAAT	351.572	17	17	94.67	94.67	NA	0	1	0	1	NA	1	NA	0	1	0	1	NA	1	10215.8	19.1935	19.1597	96.2239	95.889	0.894585	3.07199	21.5849	0.942538	0.103635	0.0907296	31	0.912727	2.97375	19.5652	0.939089	0.103635	0.0907296	26	729.566	21	21.992	97.5033	97.9079	0.904865	0.994096
TCGA-FW-A5DX-01A-11R-A27Q-07	d8d236f1-e10d-43d2-a9f8-15759c903955	8b7dde02-aa71-4df6-b108-d3f083fdaf8c	SKCM	d8d236f1-e10d-43d2-a9f8-15759c903955-130412_UNC10-SN254_0452_BC22WAACXX_4_ATCACG	NA	NA	NA	NA	NA	NA	NA	NA	NA	NA	NA	NA	NA	NA	NA	NA	NA	NA	NA	5907.26	15.3043	14.9817	99.2661	99.1172	0.867499	2.72004	15.1809	0.917874	0.148139	0.143706	23	0.722882	1.50319	4.49601	0.71962	0.39926	0.296292	8	NA	NA	NA	NA	NA	NA	NA
TCGA-FW-A5DY-06A-11R-A311-07	297bc080-4673-4de3-8322-6de409daa68b	3b07667b-295b-41c9-a3b7-28ebb409fef1	SKCM	297bc080-4673-4de3-8322-6de409daa68b-130718_UNC11-SN627_0316_BD2AUNACXX_2_TGACCA	3970.55	18.6774	18.9324	92.4829	92.8671	0.951809	3.2685	26.2719	0.954934	0.113734	0.0633182	31	0.950305	3.19996	24.5315	0.951783	0.113734	0.0759763	29	8301.85	17.6923	18.2929	91.5429	91.0619	0.892965	3.52832	34.0667	0.956921	0.122367	0.0903204	52	0.896155	3.37062	29.0965	0.952082	0.122367	0.0903204	43	NA	NA	NA	NA	NA	NA	NA
TCGA-GF-A2C7-01A-11R-A18T-07	3f453e65-4109-4264-9851-edec9375973c	5798deb1-2248-474f-b0cd-20c966128d9d	SKCM	3f453e65-4109-4264-9851-edec9375973c-120118_UNC15-SN850_0163_AD0J87ACXX_5_GATCAG	NA	NA	NA	NA	NA	NA	NA	NA	NA	NA	NA	NA	NA	NA	NA	NA	NA	NA	NA	NA	NA	NA	NA	NA	NA	NA	NA	NA	NA	NA	NA	NA	NA	NA	NA	NA	NA	NA	NA	NA	NA	NA	NA	NA	NA
TCGA-GF-A3OT-06A-23R-A239-07	d5a467a0-b222-40b2-929d-468b3ac4744e	BC638135-8E42-44BF-924E-679EC5CE2F7C	SKCM	d5a467a0-b222-40b2-929d-468b3ac4744e-120823_UNC14-SN744_0266_BD12TFACXX_8_AGTCAA	NA	NA	NA	NA	NA	NA	NA	NA	NA	NA	NA	NA	NA	NA	NA	NA	NA	NA	NA	4645.62	18.6	18.3842	98.806	98.137	0.57479	0.925088	2.52209	0.465349	0.708104	0.16005	5	0.646161	0.895769	2.44922	0.464225	0.708104	0.16005	4	NA	NA	NA	NA	NA	NA	NA
TCGA-GF-A4EO-06A-12R-A24X-07	139e89f7-1aec-4005-a740-bb971a498fee	e6ea1a59-d3b3-44ef-9f81-ea80b7e60a0d	SKCM	139e89f7-1aec-4005-a740-bb971a498fee-130129_UNC13-SN749_0217_BD1MTTACXX_4_GTCCGC	1402.26	16	14.237	91.38	93.7072	0.324459	0.224897	1.25219	0.111478	0.94075	0.0592495	2	0.324459	0.224897	1.25219	0.111478	0.94075	0.0592495	2	90749	16.6901	16.1602	92.7525	93.4142	0.814814	4.1895	65.9896	0.97403	0.0757497	0.0554762	171	0.834915	3.69935	40.4212	0.959443	0.119707	0.0763717	84	NA	NA	NA	NA	NA	NA	NA
TCGA-GF-A6C8-06A-12R-A311-07	e74054d2-a3e6-474a-b8ff-3d843e00ac0a	261b4ef8-1e68-4179-826b-8c4122502df4	SKCM	e74054d2-a3e6-474a-b8ff-3d843e00ac0a-130718_UNC11-SN627_0316_BD2AUNACXX_2_GCCAAT	NA	NA	NA	NA	NA	NA	NA	NA	NA	NA	NA	NA	NA	NA	NA	NA	NA	NA	NA	2246.37	19.375	18.6344	96.2062	94.811	0.855844	1.77968	5.92795	0.802379	0.257063	0.253944	8	0.893916	1.73948	5.69438	0.800677	0.257063	0.253944	7	NA	NA	NA	NA	NA	NA	NA
TCGA-GF-A6C9-06A-11R-A311-07	4c6ffdd5-a51f-45cc-b1c1-983ecc1f1f92	454aa611-1004-4e70-ba50-276f75b72113	SKCM	4c6ffdd5-a51f-45cc-b1c1-983ecc1f1f92-130718_UNC11-SN627_0316_BD2AUNACXX_3_CTTGTA	NA	NA	NA	NA	NA	NA	NA	NA	NA	NA	NA	NA	NA	NA	NA	NA	NA	NA	NA	51463	17.3071	16.5566	97.1328	96.8434	0.846132	4.18128	65.4497	0.974379	0.0832897	0.0633465	140	0.876529	3.84098	46.5709	0.965944	0.101441	0.0885785	80	NA	NA	NA	NA	NA	NA	NA
TCGA-GF-A769-01A-32R-A32P-07	f86aee4c-bc64-4f61-9e0f-cdbcb8652cff	c0b48dda-b719-4a9d-b732-1b0b10efd1ad	SKCM	f86aee4c-bc64-4f61-9e0f-cdbcb8652cff-131015_UNC11-SN627_0327_AC2ND3ACXX_5_AGTCAA	NA	NA	NA	NA	NA	NA	NA	NA	NA	NA	NA	NA	NA	NA	NA	NA	NA	NA	NA	NA	NA	NA	NA	NA	NA	NA	NA	NA	NA	NA	NA	NA	NA	NA	NA	NA	NA	NA	NA	NA	NA	NA	NA	NA	NA
TCGA-GN-A262-06A-11R-A18T-07	8fa99755-1143-478a-8dc0-883e0edc2bbd	2988e553-2978-4d25-b6b0-0c2d2147c5d8	SKCM	8fa99755-1143-478a-8dc0-883e0edc2bbd-120124_UNC16-SN851_0124_BC0C16ACXX_7_TAGCTT	NA	NA	NA	NA	NA	NA	NA	NA	NA	NA	NA	NA	NA	NA	NA	NA	NA	NA	NA	NA	NA	NA	NA	NA	NA	NA	NA	NA	NA	NA	NA	NA	NA	NA	NA	NA	NA	NA	NA	NA	NA	NA	NA	NA	NA
TCGA-GN-A263-01A-11R-A18T-07	0268fd3a-85e1-4d57-9594-fb031e305765	aaea9670-416a-4293-af12-8bfeb47b0150	SKCM	0268fd3a-85e1-4d57-9594-fb031e305765-120207_UNC9-SN296_0271_BC0CB8ACXX_6_TGACCA	NA	NA	NA	NA	NA	NA	NA	NA	NA	NA	NA	NA	NA	NA	NA	NA	NA	NA	NA	NA	NA	NA	NA	NA	NA	NA	NA	NA	NA	NA	NA	NA	NA	NA	NA	NA	NA	NA	NA	NA	NA	NA	NA	NA	NA
TCGA-GN-A264-06A-11R-A18U-07	746700e2-02b3-45d8-8bb4-0de6d21558ad	a9c381e2-9f6a-4b07-a804-f7c3b7e976da	SKCM	746700e2-02b3-45d8-8bb4-0de6d21558ad-120220_UNC15-SN850_0168_AD0MNAACXX_3_GATCAG	NA	NA	NA	NA	NA	NA	NA	NA	NA	NA	NA	NA	NA	NA	NA	NA	NA	NA	NA	1431.31	18	18	89.64	89.64	NA	0	1	0	1	NA	1	NA	0	1	0	1	NA	1	NA	NA	NA	NA	NA	NA	NA
TCGA-GN-A265-06A-21R-A18T-07	5b8f7f8d-04b1-4611-a8de-8dad88de0df4	2dd91279-ad0a-4ea5-b30a-df8c1c622da6	SKCM	5b8f7f8d-04b1-4611-a8de-8dad88de0df4-120220_UNC15-SN850_0168_AD0MNAACXX_4_GCCAAT	26372.3	13	13	86.5	86.5	NA	0	1	0	1	NA	1	NA	0	1	0	1	NA	1	183966	16.8269	16.8338	95.0078	96.5564	0.575002	2.67053	14.4477	0.831494	0.368414	0.101226	104	0.598582	2.4508	11.5976	0.814143	0.381381	0.134816	60	NA	NA	NA	NA	NA	NA	NA
TCGA-GN-A266-06A-11R-A18T-07	7b58175d-68f3-4e46-b70e-b580319dd13c	400b226d-d5a5-444a-9b0e-33c6c7252d1e	SKCM	7b58175d-68f3-4e46-b70e-b580319dd13c-120207_UNC10-SN254_0325_AC0C6MACXX_4_ACAGTG	257.772	16.5	16.7935	97.6675	98.2716	0.953639	1.32202	3.75101	0.719412	0.368665	0.278184	4	0.953639	1.32202	3.75101	0.719412	0.368665	0.278184	4	39348.5	16.5403	17.4827	96.9585	97.2637	0.822065	3.96259	52.5931	0.963355	0.113929	0.0882864	124	0.858557	3.77289	43.5054	0.960678	0.114234	0.0882864	81	1195.33	15.5	16.5545	98.7275	98.3359	0.580875	0.805263
TCGA-GN-A267-06A-21R-A18T-07	cd596778-0e68-4211-9244-5f4a985c960b	58fd742d-535c-494e-bb28-1bb908bfa294	SKCM	cd596778-0e68-4211-9244-5f4a985c960b-120207_UNC9-SN296_0271_BC0CB8ACXX_4_ACAGTG	NA	NA	NA	NA	NA	NA	NA	NA	NA	NA	NA	NA	NA	NA	NA	NA	NA	NA	NA	675.274	17.4	16.9519	97.238	97.9872	0.958552	1.54273	4.67734	0.774491	0.290244	0.261294	5	0.958552	1.54273	4.67734	0.774491	0.290244	0.261294	5	NA	NA	NA	NA	NA	NA	NA
TCGA-GN-A268-06A-11R-A18T-07	e7146733-0447-4b45-aacc-fa0cf47dfeb6	1898ace6-5eda-42da-a355-5e55203d7e13	SKCM	e7146733-0447-4b45-aacc-fa0cf47dfeb6-120207_UNC9-SN296_0271_BC0CB8ACXX_6_ACAGTG	NA	NA	NA	NA	NA	NA	NA	NA	NA	NA	NA	NA	NA	NA	NA	NA	NA	NA	NA	NA	NA	NA	NA	NA	NA	NA	NA	NA	NA	NA	NA	NA	NA	NA	NA	NA	NA	NA	NA	NA	NA	NA	NA	NA	NA
TCGA-GN-A26A-06A-11R-A18T-07	95c3f3f7-6789-4b31-b162-30b9a5973030	74d3061c-1507-45bb-9aea-f8a8046f8046	SKCM	95c3f3f7-6789-4b31-b162-30b9a5973030-120207_UNC9-SN296_0271_BC0CB8ACXX_5_TGACCA	NA	NA	NA	NA	NA	NA	NA	NA	NA	NA	NA	NA	NA	NA	NA	NA	NA	NA	NA	NA	NA	NA	NA	NA	NA	NA	NA	NA	NA	NA	NA	NA	NA	NA	NA	NA	NA	NA	NA	NA	NA	NA	NA	NA	NA
TCGA-GN-A26C-01A-11R-A18T-07	cb505ec8-40fe-4d68-8b71-1a07c0ff9d0e	c55d0f65-fa13-4bb5-a556-2bd78bac2ccf	SKCM	cb505ec8-40fe-4d68-8b71-1a07c0ff9d0e-120124_UNC16-SN851_0124_BC0C16ACXX_8_TAGCTT	2865.81	18.8125	19.3427	89.8012	88.2766	0.893566	2.47749	11.9113	0.894382	0.17642	0.174135	16	0.893566	2.47749	11.9113	0.894382	0.17642	0.174135	16	29728.1	17.2727	16.2548	90.489	91.8922	0.890231	3.98586	53.8317	0.972552	0.0721075	0.0578964	88	0.89415	3.75963	42.9324	0.967942	0.0756072	0.0578964	67	NA	NA	NA	NA	NA	NA	NA
TCGA-GN-A26D-06A-11R-A18T-07	61febea8-e3d8-4e63-89b0-73f4dee45f11	3baa2420-61dc-4896-85d2-035be9927bd1	SKCM	61febea8-e3d8-4e63-89b0-73f4dee45f11-120124_UNC16-SN851_0124_BC0C16ACXX_7_CTTGTA	NA	NA	NA	NA	NA	NA	NA	NA	NA	NA	NA	NA	NA	NA	NA	NA	NA	NA	NA	1693.47	16.375	16.1909	96.1	96.9769	0.888302	1.84717	6.34186	0.808542	0.28728	0.273215	8	0.888302	1.84717	6.34186	0.808542	0.28728	0.273215	8	NA	NA	NA	NA	NA	NA	NA
TCGA-GN-A4U3-06A-11R-A32P-07	41f9bcd7-ce55-4864-97ba-086341d9d533	7cecef67-73bf-4003-821c-e42ce6adfab7	SKCM	41f9bcd7-ce55-4864-97ba-086341d9d533-131015_UNC11-SN627_0327_AC2ND3ACXX_5_TTAGGC	NA	NA	NA	NA	NA	NA	NA	NA	NA	NA	NA	NA	NA	NA	NA	NA	NA	NA	NA	8929.08	15.9167	16.7283	94.8728	94.931	0.96634	3.4629	31.9093	0.965119	0.0681816	0.0558105	36	0.958937	3.29298	26.9229	0.957575	0.0808089	0.0723125	31	NA	NA	NA	NA	NA	NA	NA
TCGA-GN-A4U4-06A-11R-A32P-07	5c478c09-8749-4176-af05-a3ae307b932d	166144b5-1d22-4a3a-84a9-31bc04e3560f	SKCM	5c478c09-8749-4176-af05-a3ae307b932d-131015_UNC11-SN627_0327_AC2ND3ACXX_6_GCCAAT	949.882	14.25	12.7921	95.1825	94.7785	0.623264	0.864027	2.3727	0.434553	0.735962	0.103799	4	0.686481	0.754177	2.12586	0.421909	0.735962	0.160239	3	NA	NA	NA	NA	NA	NA	NA	NA	NA	NA	NA	NA	NA	NA	NA	NA	NA	NA	NA	NA	NA	NA	NA	NA	NA	NA
TCGA-GN-A4U5-01A-11R-A32P-07	3759318b-337a-4db6-b795-9f80dfb17fba	38755f31-a099-45fa-bb17-d78773e405ca	SKCM	3759318b-337a-4db6-b795-9f80dfb17fba-131015_UNC11-SN627_0327_AC2ND3ACXX_6_CTTGTA	NA	NA	NA	NA	NA	NA	NA	NA	NA	NA	NA	NA	NA	NA	NA	NA	NA	NA	NA	NA	NA	NA	NA	NA	NA	NA	NA	NA	NA	NA	NA	NA	NA	NA	NA	NA	NA	NA	NA	NA	NA	NA	NA	NA	NA
TCGA-GN-A4U7-06A-21R-A32P-07	451ae5dc-2bd9-4366-a4ba-4dbe0891d49d	00624286-41dd-476f-a63b-d2a5f484bb45	SKCM	451ae5dc-2bd9-4366-a4ba-4dbe0891d49d-131015_UNC11-SN627_0327_AC2ND3ACXX_6_AGTTCC	NA	NA	NA	NA	NA	NA	NA	NA	NA	NA	NA	NA	NA	NA	NA	NA	NA	NA	NA	NA	NA	NA	NA	NA	NA	NA	NA	NA	NA	NA	NA	NA	NA	NA	NA	NA	NA	NA	NA	NA	NA	NA	NA	NA	NA
TCGA-GN-A4U8-06A-11R-A32P-07	5ea53e48-fe92-4488-af6b-48091072ff22	c7abd76a-60ff-4329-b93a-2a5939c93aac	SKCM	5ea53e48-fe92-4488-af6b-48091072ff22-131015_UNC11-SN627_0327_AC2ND3ACXX_7_CCGTCC	1767.76	17.6	21.1293	93.258	92.9351	0.74992	1.20695	3.34327	0.601315	0.59106	0.165497	5	0.74992	1.20695	3.34327	0.601315	0.59106	0.165497	5	15752	17.4694	17.7447	96.0416	96.1661	0.832624	3.24042	25.5446	0.924831	0.202326	0.141811	49	0.844881	3.17777	23.9931	0.922733	0.205905	0.141811	43	171.543	22	22	98.57	98.57	NA	0
TCGA-GN-A4U8-11A-11R-A32P-07	94b766d3-f8ee-4b22-b089-5f067ffcb9cd	ff7431a9-243a-4651-80bb-096379925bbe	SKCM	94b766d3-f8ee-4b22-b089-5f067ffcb9cd-131015_UNC11-SN627_0327_AC2ND3ACXX_7_GTGAAA	16109.8	19.3333	23.1179	92.81	91.5598	0.431629	1.07256	2.92284	0.440525	0.739303	0.0807726	12	0.471652	0.980772	2.66651	0.434181	0.741564	0.0807726	8	66847.4	17.6881	19.4154	95.0062	94.74	0.843284	3.95614	52.2552	0.963807	0.133006	0.0739781	109	0.863469	3.80507	44.9283	0.961068	0.133207	0.0739781	82	480.1	16.3333	16.7848	87.0167	86.4223	0.902953	0.991995
TCGA-GN-A4U9-06A-11R-A32P-07	06b30086-f9f9-4bb0-8cf5-ba59bc9a8ca4	5a2bb92e-0429-42c3-90af-816fff63e202	SKCM	06b30086-f9f9-4bb0-8cf5-ba59bc9a8ca4-131015_UNC11-SN627_0327_AC2ND3ACXX_7_GATCAG	NA	NA	NA	NA	NA	NA	NA	NA	NA	NA	NA	NA	NA	NA	NA	NA	NA	NA	NA	NA	NA	NA	NA	NA	NA	NA	NA	NA	NA	NA	NA	NA	NA	NA	NA	NA	NA	NA	NA	NA	NA	NA	NA	NA	NA
TCGA-GN-A8LK-06A-11R-A37K-07	b2ecd070-abe3-433a-8fa6-8cfeb353e552	122a3171-ae69-4f0b-874d-8563ad05a510	SKCM	b2ecd070-abe3-433a-8fa6-8cfeb353e552-140416_UNC15-SN850_0361_AC41LKACXX_6_GATCAG	NA	NA	NA	NA	NA	NA	NA	NA	NA	NA	NA	NA	NA	NA	NA	NA	NA	NA	NA	NA	NA	NA	NA	NA	NA	NA	NA	NA	NA	NA	NA	NA	NA	NA	NA	NA	NA	NA	NA	NA	NA	NA	NA	NA	NA
TCGA-GN-A8LL-06A-21R-A37K-07	d541ac75-ec19-4f69-ba1d-2c28e86e0f49	c4e94980-3db3-4190-92cf-b2c562c664de	SKCM	d541ac75-ec19-4f69-ba1d-2c28e86e0f49-140416_UNC15-SN850_0361_AC41LKACXX_7_ATTCCT	NA	NA	NA	NA	NA	NA	NA	NA	NA	NA	NA	NA	NA	NA	NA	NA	NA	NA	NA	4998.59	17.8889	20.1544	92.5939	92.6347	0.740198	2.13945	8.49474	0.782737	0.43193	0.0847607	18	0.742607	2.05894	7.83769	0.778739	0.43193	0.0847607	16	NA	NA	NA	NA	NA	NA	NA
TCGA-GN-A8LN-01A-11R-A37K-07	43677025-6d54-478f-878b-da4a8aa22e3b	7cdb2990-a8b2-4a0c-b7ed-80e65fef466a	SKCM	43677025-6d54-478f-878b-da4a8aa22e3b-140424_UNC12-SN629_0365_AC4368ACXX_7_CAGATC	NA	NA	NA	NA	NA	NA	NA	NA	NA	NA	NA	NA	NA	NA	NA	NA	NA	NA	NA	435.234	14.6667	14.6817	88.0467	87.7088	0.990421	1.08809	2.96859	0.659765	0.387947	0.340866	3	0.990421	1.08809	2.96859	0.659765	0.387947	0.340866	3	NA	NA	NA	NA	NA	NA	NA
TCGA-GN-A9SD-06A-11R-A40A-07	0e03c743-aea3-4808-bd10-ca16b8a0abdd	c7636fd5-9a24-4035-b6bd-beddb590a4ee	SKCM	0e03c743-aea3-4808-bd10-ca16b8a0abdd-140716_UNC13-SN749_0364_BC4V7WACXX_3_TAGCTT	745.676	17.6	17.5666	90.772	91.3271	0.956274	1.53906	4.66022	0.767796	0.35804	0.173367	5	0.956274	1.53906	4.66022	0.767796	0.35804	0.173367	5	7468.09	18.0303	17.4944	91.9009	92.663	0.903075	3.15761	23.5143	0.946	0.106622	0.103613	33	0.871277	2.65262	14.1912	0.901948	0.221989	0.106622	21	163.852	19.6667	19.8349	99.6967	99.9326	0.820507	0.901419
TCGA-HR-A2OG-06A-21R-A18U-07	f565cde4-6f8a-47e7-86d7-d101c8a1f59d	cecff6a7-eb65-4ad2-b801-11340a75d93d	SKCM	f565cde4-6f8a-47e7-86d7-d101c8a1f59d-120220_UNC15-SN850_0168_AD0MNAACXX_4_CAGATC	11172.4	17.5714	16.7893	90.3371	92.1755	0.757606	1.47423	4.36769	0.711117	0.455389	0.20251	7	0.757606	1.47423	4.36769	0.711117	0.455389	0.20251	7	263923	19.0094	19.3321	89.7003	90.4618	0.757685	3.53342	34.2409	0.945514	0.1638	0.0792625	106	0.690649	2.95367	19.1763	0.864527	0.335779	0.107573	72	349892	19.1062	19.2782	94.9492	94.9362	0.29497	1.49702
TCGA-HR-A2OH-06A-11R-A18U-07	e05617c1-b993-44c1-a0fc-adf4ce798b4a	973491e1-8cb1-4a4e-9df9-dc31b95804c1	SKCM	e05617c1-b993-44c1-a0fc-adf4ce798b4a-120724_UNC11-SN627_0247_AC0Y10ACXX_8_TAGCTT	261.447	17	17.2031	89.58	89.9577	0.970047	0.672385	1.9589	0.479382	0.601533	0.398467	2	0.970047	0.672385	1.9589	0.479382	0.601533	0.398467	2	69554.9	17.3721	17.9349	94.8502	97.5413	0.645953	2.42956	11.3539	0.843728	0.32376	0.154704	43	0.664193	2.41606	11.2016	0.842992	0.32483	0.154704	38	96.1645	18	18	96.4	96.4	NA	0
TCGA-HR-A5NC-01A-11R-A27Q-07	5412db90-baeb-44c2-8b6a-d9160e0d78b9	d301aa79-d2c6-462e-883f-fd4130e1d0f6	SKCM	5412db90-baeb-44c2-8b6a-d9160e0d78b9-130412_UNC10-SN254_0452_BC22WAACXX_5_GATCAG	NA	NA	NA	NA	NA	NA	NA	NA	NA	NA	NA	NA	NA	NA	NA	NA	NA	NA	NA	NA	NA	NA	NA	NA	NA	NA	NA	NA	NA	NA	NA	NA	NA	NA	NA	NA	NA	NA	NA	NA	NA	NA	NA	NA	NA
TCGA-IH-A3EA-01A-11R-A20F-07	0df68cbe-8fc5-407f-b4a8-84156754ce20	6fc0166f-628f-4ff4-9f50-99ecc4c54337	SKCM	0df68cbe-8fc5-407f-b4a8-84156754ce20-130711_UNC12-SN629_0319_AC287CACXX_2_TTAGGC	NA	NA	NA	NA	NA	NA	NA	NA	NA	NA	NA	NA	NA	NA	NA	NA	NA	NA	NA	NA	NA	NA	NA	NA	NA	NA	NA	NA	NA	NA	NA	NA	NA	NA	NA	NA	NA	NA	NA	NA	NA	NA	NA	NA	NA
TCGA-LH-A9QB-06A-11R-A38C-07	11f33b10-e795-43dd-89d0-dc55c7495432	f955924e-fe7b-4998-b2ad-066113fa1bcb	SKCM	11f33b10-e795-43dd-89d0-dc55c7495432-140521_UNC13-SN749_0354_BC4GJ7ACXX_3_ATTCCT	NA	NA	NA	NA	NA	NA	NA	NA	NA	NA	NA	NA	NA	NA	NA	NA	NA	NA	NA	NA	NA	NA	NA	NA	NA	NA	NA	NA	NA	NA	NA	NA	NA	NA	NA	NA	NA	NA	NA	NA	NA	NA	NA	NA	NA
TCGA-OD-A75X-06A-12R-A32P-07	c838cd9c-8a49-46d8-8271-28d5c016a328	4eadf1bf-2a42-4de6-9710-86350c2fe144	SKCM	c838cd9c-8a49-46d8-8271-28d5c016a328-131016_UNC15-SN850_0333_AC2MBAACXX_1_GGCTAC	NA	NA	NA	NA	NA	NA	NA	NA	NA	NA	NA	NA	NA	NA	NA	NA	NA	NA	NA	486.659	17.25	18.0735	92.445	92.3085	0.976481	1.35369	3.87169	0.733538	0.345212	0.265033	4	0.976481	1.35369	3.87169	0.733538	0.345212	0.265033	4	NA	NA	NA	NA	NA	NA	NA
TCGA-QB-A6FS-06A-11R-A311-07	2ac6d63b-330a-46b9-a765-e7237c074c48	702fd339-2f1b-4db8-8948-8a58f69f53fb	SKCM	2ac6d63b-330a-46b9-a765-e7237c074c48-130722_UNC9-SN296_0385_AD2F28ACXX_3_CGATGT	NA	NA	NA	NA	NA	NA	NA	NA	NA	NA	NA	NA	NA	NA	NA	NA	NA	NA	NA	2837.53	18.1818	17.607	94.8414	94.7526	0.969761	2.99757	20.0368	0.946522	0.0850303	0.0847388	22	0.978697	2.97967	19.6812	0.946032	0.0850303	0.0847388	21	NA	NA	NA	NA	NA	NA	NA
TCGA-QB-AA9O-06A-11R-A39D-07	8a8b21c7-07cc-42c6-bb95-0bc56d9f0785	22023637-13d9-45d0-9641-0a6bf3eb9e53	SKCM	8a8b21c7-07cc-42c6-bb95-0bc56d9f0785-140617_UNC12-SN629_0374_AC4KA5ACXX_6_TTAGGC	NA	NA	NA	NA	NA	NA	NA	NA	NA	NA	NA	NA	NA	NA	NA	NA	NA	NA	NA	603.885	17.25	17.0532	97.4375	97.4276	0.925523	2.29984	9.97256	0.888815	0.160849	0.158446	12	0.859804	1.54056	4.66722	0.722596	0.468782	0.131554	6	NA	NA	NA	NA	NA	NA	NA
TCGA-RP-A690-06A-11R-A311-07	b7f7785c-cd03-499b-abf3-13d5187434ad	0e4d53ba-dd42-41b7-bcfe-ff8b9b5dab07	SKCM	b7f7785c-cd03-499b-abf3-13d5187434ad-130722_UNC9-SN296_0385_AD2F28ACXX_3_GCCAAT	NA	NA	NA	NA	NA	NA	NA	NA	NA	NA	NA	NA	NA	NA	NA	NA	NA	NA	NA	NA	NA	NA	NA	NA	NA	NA	NA	NA	NA	NA	NA	NA	NA	NA	NA	NA	NA	NA	NA	NA	NA	NA	NA	NA	NA
TCGA-RP-A693-06A-13R-A311-07	7d231171-a6c6-4558-ba91-a5a2078fbdeb	d48d8c30-082c-4cbe-a26e-db4f9652b5c2	SKCM	7d231171-a6c6-4558-ba91-a5a2078fbdeb-130722_UNC9-SN296_0385_AD2F28ACXX_3_AGTCAA	2292.74	18.2	19.4928	88.128	92.2318	0.742155	1.19445	3.30175	0.639193	0.447447	0.387721	5	0.742155	1.19445	3.30175	0.639193	0.447447	0.387721	5	35242.5	18.431	17.9441	92.1157	93.5935	0.634256	2.57536	13.1361	0.798198	0.427065	0.0771801	58	0.601224	2.3148	10.1229	0.736315	0.498316	0.080506	47	NA	NA	NA	NA	NA	NA	NA
TCGA-RP-A694-06A-11R-A311-07	2eaf73b3-8ae8-442d-bcc6-d9d67b9c827d	daf9b208-dd9e-4281-89f6-ea9d7d0eda7e	SKCM	2eaf73b3-8ae8-442d-bcc6-d9d67b9c827d-130729_UNC12-SN629_0323_AC2DMAACXX_2_TTAGGC	1196.19	9	9	87.95	87.95	NA	0	1	0	1	NA	1	NA	0	1	0	1	NA	1	33434.4	17.2462	17.4702	94.3337	93.5368	0.800641	3.34219	28.2809	0.947146	0.102823	0.102755	65	0.85507	3.04007	20.9067	0.938379	0.102823	0.102755	35	178.608	17	17	95.11	95.11	NA	0
TCGA-RP-A695-06A-11R-A311-07	e72c0c10-fe4d-40ec-9c83-d610436724e6	ef3db400-ac1d-42e2-ad80-47cda1baa489	SKCM	e72c0c10-fe4d-40ec-9c83-d610436724e6-130729_UNC12-SN629_0323_AC2DMAACXX_3_TAGCTT	145.342	29	29	96.035	96.1745	0.789567	0.547286	1.72856	0.361382	0.763266	0.236734	2	0.789567	0.547286	1.72856	0.361382	0.763266	0.236734	2	12991	21.4	25.1159	92.5689	94.305	0.707163	2.51421	12.3569	0.839808	0.347828	0.129095	35	0.74263	2.26095	9.59223	0.829551	0.347828	0.130876	21	NA	NA	NA	NA	NA	NA	NA
TCGA-RP-A6K9-06A-41R-A352-07	ccfec902-a589-43c2-892c-e350b6bfe118	6bf0259e-8b61-4b97-97a3-ccea8a0fa44f	SKCM	ccfec902-a589-43c2-892c-e350b6bfe118-140312_UNC11-SN627_0348_AC3KRYACXX_5_GATCAG	129.575	17	17	89.33	89.33	NA	0	1	0	1	NA	1	NA	0	1	0	1	NA	1	3580.9	15.3333	15.3635	90.4383	89.2868	0.881435	2.19028	8.93776	0.855171	0.257067	0.213234	12	0.881435	2.19028	8.93776	0.855171	0.257067	0.213234	12	NA	NA	NA	NA	NA	NA	NA
TCGA-W3-A824-06A-21R-A352-07	74cde8da-7c44-49e3-bbbf-effa87779a3e	2535f39c-5024-4596-8e96-76ccae28e9ca	SKCM	74cde8da-7c44-49e3-bbbf-effa87779a3e-140318_UNC12-SN629_0354_AC3K7VACXX_4_GTCCGC	NA	NA	NA	NA	NA	NA	NA	NA	NA	NA	NA	NA	NA	NA	NA	NA	NA	NA	NA	202.317	15.5	15.4575	90.915	90.8213	0.999421	0.692746	1.9992	0.499598	0.51417	0.48583	2	0.999421	0.692746	1.9992	0.499598	0.51417	0.48583	2	NA	NA	NA	NA	NA	NA	NA
TCGA-W3-A825-06A-11R-A352-07	1e2e9741-284c-40a9-8bb8-73c4d5014af4	2553c98d-ef57-4a19-881a-556c5aca29b4	SKCM	1e2e9741-284c-40a9-8bb8-73c4d5014af4-140318_UNC12-SN629_0354_AC3K7VACXX_5_GCCAAT	395.79	20.5	20.3661	93.835	93.9965	0.997929	0.691712	1.99713	0.498565	0.526786	0.473214	2	0.997929	0.691712	1.99713	0.498565	0.526786	0.473214	2	4269.76	21.75	18.7529	97.4825	97.0356	0.807491	1.11942	3.06308	0.635597	0.436317	0.393751	4	0.807491	1.11942	3.06308	0.635597	0.436317	0.393751	4	NA	NA	NA	NA	NA	NA	NA
TCGA-W3-A828-06A-11R-A352-07	ca045c46-1640-4842-9a72-4f847b413907	af11c773-592d-436b-9045-66985689345c	SKCM	ca045c46-1640-4842-9a72-4f847b413907-141031_UNC11-SN627_0387_AC5FAKACXX_2_CCGTCC	59.9596	20	20	92.59	92.59	NA	0	1	0	1	NA	1	NA	0	1	0	1	NA	1	96.9209	23	23	98.07	98.07	NA	0	1	0	1	NA	1	NA	0	1	0	1	NA	1	NA	NA	NA	NA	NA	NA	NA
TCGA-W3-AA1O-06A-11R-A38C-07	3fad30da-f773-4916-99c1-f2953ca234dd	cb797021-9c9f-483c-88b8-0dc876fea489	SKCM	3fad30da-f773-4916-99c1-f2953ca234dd-140521_UNC13-SN749_0354_BC4GJ7ACXX_6_GCCAAT	NA	NA	NA	NA	NA	NA	NA	NA	NA	NA	NA	NA	NA	NA	NA	NA	NA	NA	NA	103.239	17	17	94.22	94.22	NA	0	1	0	1	NA	1	NA	0	1	0	1	NA	1	NA	NA	NA	NA	NA	NA	NA
TCGA-W3-AA1Q-06A-11R-A38C-07	bb08fee8-d97a-4ab4-9fb2-4c6b8340bb03	e1d52c4c-7521-496a-b91d-3facafe4716b	SKCM	bb08fee8-d97a-4ab4-9fb2-4c6b8340bb03-140603_UNC11-SN627_0360_AC4H72ACXX_6_AGTCAA	1307.02	20	21.3781	91.445	91.7585	0.623349	0.432073	1.54045	0.262591	0.844535	0.155465	2	0.623349	0.432073	1.54045	0.262591	0.844535	0.155465	2	2346.95	18.5556	20.5212	94.39	92.2806	0.778267	1.71003	5.52911	0.770412	0.355979	0.226466	9	0.847334	1.64884	5.20092	0.768261	0.355979	0.226466	7	NA	NA	NA	NA	NA	NA	NA
TCGA-W3-AA1R-06A-11R-A39D-07	e19153b7-5d3a-4096-a52b-430f4b6ef466	f6677842-9fa2-4d4e-8ef1-06610311eecd	SKCM	e19153b7-5d3a-4096-a52b-430f4b6ef466-140617_UNC12-SN629_0374_AC4KA5ACXX_1_CTTGTA	NA	NA	NA	NA	NA	NA	NA	NA	NA	NA	NA	NA	NA	NA	NA	NA	NA	NA	NA	15767.7	17	12.7912	95.135	97.1488	0.506399	0.907346	2.47774	0.439029	0.731949	0.133936	6	0.506399	0.907346	2.47774	0.439029	0.731949	0.133936	6	NA	NA	NA	NA	NA	NA	NA
TCGA-W3-AA1V-06B-11R-A40A-07	56cb8f55-8e92-4b8a-b435-d57c938181b5	01c6644f-c721-4f5e-afbc-c220218941d8	SKCM	56cb8f55-8e92-4b8a-b435-d57c938181b5-140716_UNC13-SN749_0364_BC4V7WACXX_4_GTTTCG	NA	NA	NA	NA	NA	NA	NA	NA	NA	NA	NA	NA	NA	NA	NA	NA	NA	NA	NA	1610.52	19	19.9409	94.1467	95.0172	0.572981	0.629484	1.87664	0.34577	0.792164	0.154458	3	0.572981	0.629484	1.87664	0.34577	0.792164	0.154458	3	NA	NA	NA	NA	NA	NA	NA
TCGA-W3-AA1W-06A-11R-A38C-07	d715074b-a7bc-4dc0-98e8-e3064567e6cb	050132b1-5052-4af0-bfc0-fae1b5f0f15a	SKCM	d715074b-a7bc-4dc0-98e8-e3064567e6cb-140603_UNC11-SN627_0360_AC4H72ACXX_5_GTCCGC	1294.7	16.3333	16.7781	91.3167	92.9572	0.700701	0.769798	2.15933	0.432265	0.727564	0.161467	3	0.700701	0.769798	2.15933	0.432265	0.727564	0.161467	3	15278.8	17.5581	18.4974	94.9523	94.3662	0.777894	2.92581	18.6494	0.909383	0.209051	0.140664	43	0.799115	2.84113	17.1352	0.905593	0.209051	0.140664	35	NA	NA	NA	NA	NA	NA	NA
TCGA-W3-AA21-06A-11R-A38C-07	862ee3b0-7a01-4cdd-9f31-2e87eacc262a	430b47b5-5751-4443-8c73-642f79fc1ccd	SKCM	862ee3b0-7a01-4cdd-9f31-2e87eacc262a-140509_UNC11-SN627_0357_BC4CGKACXX_3_CTTGTA	NA	NA	NA	NA	NA	NA	NA	NA	NA	NA	NA	NA	NA	NA	NA	NA	NA	NA	NA	NA	NA	NA	NA	NA	NA	NA	NA	NA	NA	NA	NA	NA	NA	NA	NA	NA	NA	NA	NA	NA	NA	NA	NA	NA	NA
TCGA-WE-A8JZ-06A-11R-A37K-07	3df47587-209f-49d5-8bfe-fd0d5c6522e2	7b989b5a-5fa8-4996-afe7-1d1192d82437	SKCM	3df47587-209f-49d5-8bfe-fd0d5c6522e2-140424_UNC12-SN629_0365_AC4368ACXX_8_GTCCGC	NA	NA	NA	NA	NA	NA	NA	NA	NA	NA	NA	NA	NA	NA	NA	NA	NA	NA	NA	682.485	20	19.0039	96.72	97.4571	0.812828	0.56341	1.75665	0.375978	0.74902	0.25098	2	0.812828	0.56341	1.75665	0.375978	0.74902	0.25098	2	NA	NA	NA	NA	NA	NA	NA
TCGA-WE-A8K1-06A-21R-A37K-07	aaccdaa5-8e6b-4dc1-81eb-65ccbe59ea7e	652715e1-ffe5-4913-9dce-457f8ed8c337	SKCM	aaccdaa5-8e6b-4dc1-81eb-65ccbe59ea7e-140502_UNC12-SN629_0366_AC3UT1ACXX_2_ACTTGA	219.34	14	14	95.3	95.3	NA	0	1	0	1	NA	1	NA	0	1	0	1	NA	1	14555.3	17.7083	15.6036	93.9387	93.9546	0.708838	2.25272	9.51362	0.8342	0.295724	0.226302	24	0.743364	2.18879	8.92441	0.831413	0.295724	0.228938	19	NA	NA	NA	NA	NA	NA	NA
TCGA-WE-A8K4-01A-12R-A37K-07	9ff8061b-b21b-479c-b182-99af005241d2	0bdb4dc0-c3d9-4a84-8ad3-6b3d3b532eb0	SKCM	9ff8061b-b21b-479c-b182-99af005241d2-140424_UNC12-SN629_0365_AC4368ACXX_7_GTGAAA	NA	NA	NA	NA	NA	NA	NA	NA	NA	NA	NA	NA	NA	NA	NA	NA	NA	NA	NA	NA	NA	NA	NA	NA	NA	NA	NA	NA	NA	NA	NA	NA	NA	NA	NA	NA	NA	NA	NA	NA	NA	NA	NA	NA	NA
TCGA-WE-A8K5-06A-11R-A37K-07	ee76b3b0-c6a8-4176-ae7a-7af338cc8ede	42b44ed6-6b89-478f-a045-0e52d49ed062	SKCM	ee76b3b0-c6a8-4176-ae7a-7af338cc8ede-140416_UNC15-SN850_0361_AC41LKACXX_7_TAGCTT	NA	NA	NA	NA	NA	NA	NA	NA	NA	NA	NA	NA	NA	NA	NA	NA	NA	NA	NA	1663.22	19.6667	22.4747	94.49	93.4633	0.657658	0.722511	2.0596	0.40135	0.752079	0.157833	3	0.629099	0.436059	1.5466	0.265843	0.842167	0.157833	2	NA	NA	NA	NA	NA	NA	NA
TCGA-WE-A8K6-06A-11R-A37K-07	46b56baf-e71c-4f7b-8f13-f5efe32cb1a5	c791ef65-1860-4817-9234-15620399255a	SKCM	46b56baf-e71c-4f7b-8f13-f5efe32cb1a5-140416_UNC15-SN850_0361_AC41LKACXX_6_ATCACG	NA	NA	NA	NA	NA	NA	NA	NA	NA	NA	NA	NA	NA	NA	NA	NA	NA	NA	NA	186.348	15	15	93.94	93.94	NA	0	1	0	1	NA	1	NA	0	1	0	1	NA	1	NA	NA	NA	NA	NA	NA	NA
TCGA-WE-A8ZM-06A-11R-A37K-07	74c91465-7a6c-4255-bb48-191e62fbaaa4	92679a1c-2b16-4b27-841f-e21f5f932f1e	SKCM	74c91465-7a6c-4255-bb48-191e62fbaaa4-140416_UNC15-SN850_0361_AC41LKACXX_5_GGCTAC	NA	NA	NA	NA	NA	NA	NA	NA	NA	NA	NA	NA	NA	NA	NA	NA	NA	NA	NA	NA	NA	NA	NA	NA	NA	NA	NA	NA	NA	NA	NA	NA	NA	NA	NA	NA	NA	NA	NA	NA	NA	NA	NA	NA	NA
TCGA-WE-A8ZN-06A-11R-A37K-07	5f8ba9ee-aafb-4902-b8d5-94d2739eb8fd	18310f27-87d8-4c31-bba8-2f80f400ee17	SKCM	5f8ba9ee-aafb-4902-b8d5-94d2739eb8fd-140416_UNC15-SN850_0361_AC41LKACXX_8_CGATGT	NA	NA	NA	NA	NA	NA	NA	NA	NA	NA	NA	NA	NA	NA	NA	NA	NA	NA	NA	10168.1	17	16.9969	94.46	98.0317	0.134855	0.186949	1.20557	0.067907	0.965216	0.0151362	4	0.134855	0.186949	1.20557	0.067907	0.965216	0.0151362	4	NA	NA	NA	NA	NA	NA	NA
TCGA-WE-A8ZO-06A-11R-A37K-07	249a537a-784b-4b41-b64f-0597f178610b	e25942e1-70e7-425d-b2fc-f26e9be00b4a	SKCM	249a537a-784b-4b41-b64f-0597f178610b-140502_UNC12-SN629_0366_AC3UT1ACXX_2_GATCAG	NA	NA	NA	NA	NA	NA	NA	NA	NA	NA	NA	NA	NA	NA	NA	NA	NA	NA	NA	5330.06	18.8462	18.5657	96.6115	98.4507	0.694373	1.78103	5.93598	0.695378	0.528239	0.0845689	13	0.694373	1.78103	5.93598	0.695378	0.528239	0.0845689	13	962.839	19.3333	18.3936	93.8767	95.3698	0.797603	0.876256
TCGA-WE-A8ZQ-06A-41R-A37K-07	6a3e9672-020b-46ea-828c-3bd95b323b7e	3df4a91c-dae7-45e4-90e5-2b4fc1ae0925	SKCM	6a3e9672-020b-46ea-828c-3bd95b323b7e-140502_UNC12-SN629_0366_AC3UT1ACXX_2_ATCACG	NA	NA	NA	NA	NA	NA	NA	NA	NA	NA	NA	NA	NA	NA	NA	NA	NA	NA	NA	NA	NA	NA	NA	NA	NA	NA	NA	NA	NA	NA	NA	NA	NA	NA	NA	NA	NA	NA	NA	NA	NA	NA	NA	NA	NA
TCGA-WE-A8ZR-06A-11R-A37K-07	c0bbd262-3caf-42d7-816e-4a691aa4ec19	bbfd29b5-5d8d-4850-a9a5-def31a843842	SKCM	c0bbd262-3caf-42d7-816e-4a691aa4ec19-140502_UNC12-SN629_0366_AC3UT1ACXX_3_CTTGTA	360.468	24	24	93.63	93.63	NA	0	1	0	1	NA	1	NA	0	1	0	1	NA	1	16922.2	17.8113	15.7032	97.6106	97.4491	0.779548	3.09503	22.0879	0.901773	0.268169	0.0893208	53	0.811207	2.9292	18.7127	0.898313	0.268169	0.0893208	37	769.038	18.2	19.6815	99.324	98.8688	0.919572	1.47999
TCGA-WE-A8ZT-06A-11R-A37K-07	3df7ea08-8549-4b44-b86d-dae478e3912b	a2eacae1-57f4-4db3-8abb-ed09fe1db757	SKCM	3df7ea08-8549-4b44-b86d-dae478e3912b-140502_UNC12-SN629_0366_AC3UT1ACXX_1_CGATGT	NA	NA	NA	NA	NA	NA	NA	NA	NA	NA	NA	NA	NA	NA	NA	NA	NA	NA	NA	NA	NA	NA	NA	NA	NA	NA	NA	NA	NA	NA	NA	NA	NA	NA	NA	NA	NA	NA	NA	NA	NA	NA	NA	NA	NA
TCGA-WE-A8ZX-06A-11R-A37K-07	a73af772-a00b-4726-b9b9-cef8f9c286d9	024d98cb-3e52-4b3e-a07b-aefdee10e571	SKCM	a73af772-a00b-4726-b9b9-cef8f9c286d9-140416_UNC15-SN850_0361_AC41LKACXX_4_GTGGCC	NA	NA	NA	NA	NA	NA	NA	NA	NA	NA	NA	NA	NA	NA	NA	NA	NA	NA	NA	8179.34	16.3077	13.2639	96.8138	94.7181	0.573295	1.47047	4.35129	0.632746	0.559075	0.217354	13	0.576337	1.43214	4.18766	0.624759	0.566217	0.217354	12	3721.12	16.25	16.5664	96.1525	94.998	0.813637	1.12794
TCGA-WE-A8ZY-06A-11R-A37K-07	d2437722-43b5-4e73-bfcd-839b0f3e1fb8	2cb0b819-6151-41ae-8c9a-e1e5d928e8d5	SKCM	d2437722-43b5-4e73-bfcd-839b0f3e1fb8-140416_UNC15-SN850_0361_AC41LKACXX_6_TTAGGC	NA	NA	NA	NA	NA	NA	NA	NA	NA	NA	NA	NA	NA	NA	NA	NA	NA	NA	NA	206.229	25	25	100	100	0.986779	0.683983	1.98176	0.490864	0.567586	0.432414	2	0.986779	0.683983	1.98176	0.490864	0.567586	0.432414	2	NA	NA	NA	NA	NA	NA	NA
TCGA-WE-AA9Y-06A-12R-A38C-07	35dc8071-6dcb-436c-a1fc-5ae1e8d6fd04	a310308c-57cf-4bb2-82e3-db1518bb79af	SKCM	35dc8071-6dcb-436c-a1fc-5ae1e8d6fd04-140509_UNC11-SN627_0357_BC4CGKACXX_2_GTGAAA	6313.22	18.4545	17.8766	92.3627	92.7903	0.859433	2.65654	14.247	0.899971	0.235334	0.0964998	22	0.859433	2.65654	14.247	0.899971	0.235334	0.0964998	22	11911.3	18.2553	18.645	92.3355	92.53	0.860659	3.31367	27.4857	0.937825	0.17891	0.107592	47	0.864024	3.30804	27.3314	0.937613	0.17891	0.108581	46	NA	NA	NA	NA	NA	NA	NA
TCGA-WE-AAA0-06A-11R-A38C-07	c13f1207-1210-41aa-9be0-18b12e35b6b6	0fcd83db-c7e1-4522-a567-fd22ae73202f	SKCM	c13f1207-1210-41aa-9be0-18b12e35b6b6-140521_UNC13-SN749_0354_BC4GJ7ACXX_8_ACAGTG	NA	NA	NA	NA	NA	NA	NA	NA	NA	NA	NA	NA	NA	NA	NA	NA	NA	NA	NA	NA	NA	NA	NA	NA	NA	NA	NA	NA	NA	NA	NA	NA	NA	NA	NA	NA	NA	NA	NA	NA	NA	NA	NA	NA	NA
TCGA-WE-AAA3-06A-11R-A38C-07	393dd88e-6c17-4239-a128-719fbd175ea2	fbd2eeac-ae28-4948-bf57-91f65375fa77	SKCM	393dd88e-6c17-4239-a128-719fbd175ea2-140521_UNC13-SN749_0354_BC4GJ7ACXX_6_GTGGCC	NA	NA	NA	NA	NA	NA	NA	NA	NA	NA	NA	NA	NA	NA	NA	NA	NA	NA	NA	3311.9	20.2	19.1098	94.266	93.4365	0.890667	1.43347	4.19324	0.724491	0.424609	0.218139	5	0.890667	1.43347	4.19324	0.724491	0.424609	0.218139	5	NA	NA	NA	NA	NA	NA	NA
TCGA-WE-AAA4-06A-12R-A38C-07	6ddb3889-abc9-4c30-b390-285052c0cf52	4151ec0a-ecb0-4b7f-bd88-24ff382d2010	SKCM	6ddb3889-abc9-4c30-b390-285052c0cf52-140521_UNC13-SN749_0354_BC4GJ7ACXX_6_CGATGT	NA	NA	NA	NA	NA	NA	NA	NA	NA	NA	NA	NA	NA	NA	NA	NA	NA	NA	NA	3355.2	18.7778	13.9823	96.9622	97.5604	0.584867	1.28508	3.61497	0.53754	0.66693	0.0833702	9	0.583843	1.21407	3.36715	0.532224	0.66693	0.104611	8	NA	NA	NA	NA	NA	NA	NA
TCGA-XV-A9VZ-01A-11R-A38C-07	fbe70b5a-8b80-4b4a-962d-788f43612e12	99106f6c-2f6f-4b14-8d47-df22b7862153	SKCM	fbe70b5a-8b80-4b4a-962d-788f43612e12-140521_UNC13-SN749_0354_BC4GJ7ACXX_7_GATCAG	NA	NA	NA	NA	NA	NA	NA	NA	NA	NA	NA	NA	NA	NA	NA	NA	NA	NA	NA	NA	NA	NA	NA	NA	NA	NA	NA	NA	NA	NA	NA	NA	NA	NA	NA	NA	NA	NA	NA	NA	NA	NA	NA	NA	NA
TCGA-XV-A9W2-01A-11R-A39D-07	7e6aecaa-896e-4497-9608-d72a7275eb7b	eee95aed-9ab0-42cf-80ca-f8bd5e994037	SKCM	7e6aecaa-896e-4497-9608-d72a7275eb7b-140617_UNC12-SN629_0374_AC4KA5ACXX_7_GTGAAA	NA	NA	NA	NA	NA	NA	NA	NA	NA	NA	NA	NA	NA	NA	NA	NA	NA	NA	NA	1990.79	14.3333	13.8426	85.53	83.7787	0.713586	1.27858	3.59152	0.620482	0.573888	0.154913	6	0.47039	0.516776	1.67661	0.276825	0.839794	0.130538	3	NA	NA	NA	NA	NA	NA	NA
TCGA-XV-A9W5-01A-11R-A38C-07	b133085b-7ae9-49d5-9d84-847d0b37d1ab	f473687f-b6b0-41cd-95a9-d5051299507c	SKCM	b133085b-7ae9-49d5-9d84-847d0b37d1ab-140603_UNC11-SN627_0360_AC4H72ACXX_7_ATGTCA	NA	NA	NA	NA	NA	NA	NA	NA	NA	NA	NA	NA	NA	NA	NA	NA	NA	NA	NA	NA	NA	NA	NA	NA	NA	NA	NA	NA	NA	NA	NA	NA	NA	NA	NA	NA	NA	NA	NA	NA	NA	NA	NA	NA	NA
TCGA-XV-AAZV-01A-11R-A40A-07	57fc3604-4527-4504-b2ec-f027cfc81248	248868a4-376a-41fa-869f-e2bfedc14f42	SKCM	57fc3604-4527-4504-b2ec-f027cfc81248-140715_UNC11-SN627_0367_BC4KEPACXX_6_ACAGTG	NA	NA	NA	NA	NA	NA	NA	NA	NA	NA	NA	NA	NA	NA	NA	NA	NA	NA	NA	NA	NA	NA	NA	NA	NA	NA	NA	NA	NA	NA	NA	NA	NA	NA	NA	NA	NA	NA	NA	NA	NA	NA	NA	NA	NA
TCGA-XV-AAZW-01A-12R-A40A-07	b444331d-6ba7-485a-99a9-c8b5a99f1222	7355574a-71bd-48a1-adaa-1390d173fca3	SKCM	b444331d-6ba7-485a-99a9-c8b5a99f1222-140715_UNC11-SN627_0367_BC4KEPACXX_4_ACTTGA	NA	NA	NA	NA	NA	NA	NA	NA	NA	NA	NA	NA	NA	NA	NA	NA	NA	NA	NA	NA	NA	NA	NA	NA	NA	NA	NA	NA	NA	NA	NA	NA	NA	NA	NA	NA	NA	NA	NA	NA	NA	NA	NA	NA	NA
TCGA-XV-AAZY-01A-12R-A40A-07	7aab8a96-6787-407c-8df9-1422ac0cca97	5a1b46dc-3819-4e1b-b5e6-a4240da025a8	SKCM	7aab8a96-6787-407c-8df9-1422ac0cca97-140715_UNC11-SN627_0367_BC4KEPACXX_4_TAGCTT	NA	NA	NA	NA	NA	NA	NA	NA	NA	NA	NA	NA	NA	NA	NA	NA	NA	NA	NA	3848.73	18.32	18.3294	99.3112	99.3475	0.868497	2.79558	16.3722	0.927013	0.128415	0.108599	25	0.870384	2.35704	10.5597	0.866678	0.294979	0.108599	15	439.425	18	19.0145	97.41	97.9451	0.953092	0.660633
TCGA-XV-AB01-06A-12R-A40A-07	aad2b942-019b-499e-9a30-75ed4ce4d4d7	b6e6842a-3e5d-43ac-ac7f-e983b0614d76	SKCM	aad2b942-019b-499e-9a30-75ed4ce4d4d7-140715_UNC11-SN627_0367_BC4KEPACXX_2_CTTGTA	1826.58	18	16.1291	88.7076	90.7137	0.806267	2.28433	9.81908	0.853012	0.266652	0.223251	17	0.822414	2.28022	9.77878	0.852993	0.266652	0.223251	16	4071.26	18.1111	17.8371	89.0817	88.6067	0.892999	3.20008	24.5345	0.934453	0.194522	0.0858657	36	0.874651	3.05822	21.2897	0.926471	0.194522	0.103939	33	NA	NA	NA	NA	NA	NA	NA
TCGA-YD-A89C-06A-11R-A37K-07	5ca8002d-74d6-42ac-805a-977c842e7740	348e83c0-ddd5-49ab-982e-1741990cbd2a	SKCM	5ca8002d-74d6-42ac-805a-977c842e7740-140417_UNC13-SN749_0342_AC41N6ACXX_2_GTTTCG	NA	NA	NA	NA	NA	NA	NA	NA	NA	NA	NA	NA	NA	NA	NA	NA	NA	NA	NA	NA	NA	NA	NA	NA	NA	NA	NA	NA	NA	NA	NA	NA	NA	NA	NA	NA	NA	NA	NA	NA	NA	NA	NA	NA	NA
TCGA-YD-A9TA-06A-11R-A39D-07	86c2909e-aa4c-43b7-a515-203087ca10c7	fb71ca5f-3349-488f-95e9-772028da98c1	SKCM	86c2909e-aa4c-43b7-a515-203087ca10c7-140701_UNC12-SN629_0379_AC4KDNACXX_5_ACAGTG	2691.87	15.6667	17.2958	92.4733	93.0698	0.742981	1.33124	3.78575	0.648517	0.544986	0.166207	6	0.742981	1.33124	3.78575	0.648517	0.544986	0.166207	6	14687.3	17.1887	17.8179	93.964	94.3277	0.927033	3.68059	39.6699	0.968639	0.0753802	0.0554515	53	0.933085	3.50952	33.4322	0.963545	0.0753802	0.0736079	43	1198.39	14.2	14.3648	91.81	92.4478	0.908519	1.46221
TCGA-YD-A9TB-06A-12R-A40A-07	5ac51c47-e34a-41cf-aed0-384418d9cd24	b4dbcc0c-750f-4787-8c32-5a50cdb2b27c	SKCM	5ac51c47-e34a-41cf-aed0-384418d9cd24-140721_UNC15-SN850_0379_AC4V28ACXX_6_GTGGCC	NA	NA	NA	NA	NA	NA	NA	NA	NA	NA	NA	NA	NA	NA	NA	NA	NA	NA	NA	118.456	11	11	99.18	99.18	NA	0	1	0	1	NA	1	NA	0	1	0	1	NA	1	NA	NA	NA	NA	NA	NA	NA
TCGA-YG-AA3N-01A-11R-A38C-07	d350e9eb-622f-473a-af29-8ebb632f410e	b4b4736d-32bf-4577-af49-f35e7da87c2c	SKCM	d350e9eb-622f-473a-af29-8ebb632f410e-140603_UNC15-SN850_0369_BC4H6YACXX_5_ATCACG	1452.51	14.3333	14.5461	90.25	88.6093	0.81549	0.895907	2.44956	0.553922	0.546111	0.376667	3	0.81549	0.895907	2.44956	0.553922	0.546111	0.376667	3	3684.54	17.1875	17.092	89.6506	88.7255	0.877442	2.43279	11.3906	0.880304	0.231056	0.191415	16	0.877442	2.43279	11.3906	0.880304	0.231056	0.191415	16	132.34	14	14	100	100	NA	0
TCGA-YG-AA3O-06A-11R-A38C-07	5c84602c-9c87-4063-959e-57174e79688e	1ae15391-868a-4aa6-993a-c06e3b4e37ba	SKCM	5c84602c-9c87-4063-959e-57174e79688e-140509_UNC11-SN627_0357_BC4CGKACXX_5_AGTTCC	NA	NA	NA	NA	NA	NA	NA	NA	NA	NA	NA	NA	NA	NA	NA	NA	NA	NA	NA	5456.98	15.8	15.8807	97.7307	98.348	0.769227	2.08311	8.02936	0.79725	0.403354	0.111329	15	0.810113	2.01305	7.48615	0.794645	0.403354	0.111329	12	NA	NA	NA	NA	NA	NA	NA
TCGA-YG-AA3P-06A-11R-A38C-07	de304455-15ee-4cca-a62f-de824614399f	601934c4-5d48-440e-a17d-29c98e3d93fd	SKCM	de304455-15ee-4cca-a62f-de824614399f-140521_UNC13-SN749_0354_BC4GJ7ACXX_8_ATCACG	NA	NA	NA	NA	NA	NA	NA	NA	NA	NA	NA	NA	NA	NA	NA	NA	NA	NA	NA	357.879	19.6667	20.8008	98.3067	98.1084	0.941245	1.03406	2.81247	0.620915	0.507978	0.24637	3	0.941245	1.03406	2.81247	0.620915	0.507978	0.24637	3	NA	NA	NA	NA	NA	NA	NA
TCGA-Z2-A8RT-06A-11R-A37K-07	57d91a5a-589c-49c0-a169-8cbca345c58a	8e916902-ce63-4b1c-a636-cfc552ec6c9a	SKCM	57d91a5a-589c-49c0-a169-8cbca345c58a-140417_UNC13-SN749_0342_AC41N6ACXX_2_TGACCA	80.8118	19	19	94.06	94.06	NA	0	1	0	1	NA	1	NA	0	1	0	1	NA	1	11730.6	16.2727	17.8988	97.0027	95.4572	0.589485	1.41352	4.11041	0.613417	0.588175	0.176	11	0.620501	1.36338	3.90939	0.61121	0.588175	0.176	9	2179.9	15.75	14.6187	97.265	96.4508	0.753563	1.87253
TCGA-Z2-AA3S-06A-11R-A39D-07	496a98c9-8689-4dde-bcc8-c9ec8a8584c2	06873136-901e-4987-8700-55a85ae939af	SKCM	496a98c9-8689-4dde-bcc8-c9ec8a8584c2-140701_UNC12-SN629_0379_AC4KDNACXX_6_GTGGCC	NA	NA	NA	NA	NA	NA	NA	NA	NA	NA	NA	NA	NA	NA	NA	NA	NA	NA	NA	2705.08	15.625	14.4933	94.3413	94.9284	0.847046	1.76138	5.82048	0.775371	0.399562	0.160364	8	0.847046	1.76138	5.82048	0.775371	0.399562	0.160364	8	NA	NA	NA	NA	NA	NA	NA
TCGA-Z2-AA3V-06A-11R-A39D-07	01886ab2-c450-45d7-9fff-3fad5bbd9f37	f6cf68ce-65b5-42ef-aff4-7fdaef9d7fd3	SKCM	01886ab2-c450-45d7-9fff-3fad5bbd9f37-140603_UNC11-SN627_0360_AC4H72ACXX_8_AGTTCC	1505.78	16.1429	15.496	94.4129	92.9249	0.69138	1.34536	3.83958	0.666698	0.403786	0.401129	7	0.69138	1.34536	3.83958	0.666698	0.403786	0.401129	7	3017.14	17.8125	17.8866	94.8806	95.8869	0.944959	2.61998	13.7355	0.916207	0.154324	0.127777	16	0.944959	2.61998	13.7355	0.916207	0.154324	0.127777	16	338.666	13.5	15.0792	99.125	98.5723	0.68909	0.477641
[truncated: 89 more columns]

## Sheet: Supplemental_table_2
samples	TCGA_ge_predicted_subtype	TCGA_ge_publication_labels	BAGS	Reg_B_cells	Mutation_sub
TCGA-3N-A9WB-06A-11R-A38C-07	Keratin	NA	Centroblast	IL10_plus	RAS
TCGA-3N-A9WC-06A-11R-A38C-07	Immune	NA	Memory	IL10_minus	RAS
TCGA-3N-A9WD-06A-11R-A38C-07	Immune	NA	Memory	IL10_plus	RAS
TCGA-BF-A1PU-01A-11R-A18S-07	Keratin	Keratin	Centrocyte	IL10_plus	BRAF
TCGA-BF-A1PV-01A-11R-A18U-07	Keratin	Keratin	Centroblast	IL10_plus	Multiple
TCGA-BF-A1PX-01A-12R-A18T-07	Immune	Keratin	Memory	IL10_plus	Multiple
TCGA-BF-A1PZ-01A-11R-A18S-07	Keratin	Keratin	Centrocyte	IL10_plus	RAS
TCGA-BF-A1Q0-01A-21R-A18S-07	MITF-low	Immune	Centroblast	IL10_plus	NF1
TCGA-BF-A3DJ-01A-11R-A20F-07	MITF-low	Keratin	Centrocyte	IL10_minus	BRAF
TCGA-BF-A3DL-01A-11R-A20F-07	Keratin	Keratin	Centrocyte	IL10_plus	BRAF
TCGA-BF-A3DM-01A-11R-A20F-07	MITF-low	MITF-low	Plasmablast	IL10_plus	BRAF
TCGA-BF-A3DN-01A-11R-A20F-07	MITF-low	MITF-low	Centrocyte	IL10_plus	BRAF
TCGA-BF-A5EO-01A-12R-A27Q-07	Keratin	Keratin	Centrocyte	IL10_plus	RAS
TCGA-BF-A5EP-01A-12R-A27Q-07	MITF-low	Keratin	Centrocyte	IL10_plus	NA
TCGA-BF-A5EQ-01A-21R-A27Q-07	Immune	Immune	Memory	IL10_plus	BRAF
TCGA-BF-A5ER-01A-12R-A27Q-07	Keratin	Keratin	Centroblast	IL10_plus	BRAF
TCGA-BF-A5ES-01A-11R-A27Q-07	Keratin	Immune	Centrocyte	IL10_minus	NA
TCGA-BF-A9VF-01A-11R-A37K-07	Keratin	NA	Centroblast	IL10_plus	BRAF
TCGA-BF-AAOU-01A-12R-A39D-07	MITF-low	NA	Centrocyte	IL10_plus	NA
TCGA-BF-AAOX-01A-11R-A39D-07	Keratin	NA	Centroblast	IL10_plus	RAS
TCGA-BF-AAP0-06A-11R-A39D-07	Immune	NA	Memory	IL10_minus	BRAF
TCGA-BF-AAP1-01A-11R-A39D-07	MITF-low	NA	Centroblast	IL10_plus	BRAF
TCGA-BF-AAP2-01A-11R-A40A-07	Keratin	NA	Centroblast	IL10_plus	RAS
TCGA-BF-AAP4-01A-11R-A40A-07	Immune	NA	Centrocyte	IL10_plus	Multiple
TCGA-BF-AAP6-01A-11R-A40A-07	Keratin	NA	Centrocyte	IL10_plus	BRAF
TCGA-BF-AAP7-01A-11R-A40A-07	Immune	NA	Centrocyte	IL10_plus	BRAF
TCGA-BF-AAP8-01A-11R-A40A-07	Keratin	NA	Plasmablast	IL10_plus	NA
TCGA-D3-A1Q1-06A-21R-A18T-07	MITF-low	Keratin	Centroblast	IL10_plus	RAS
TCGA-D3-A1Q3-06A-11R-A18T-07	Immune	Immune	Memory	IL10_minus	NA
TCGA-D3-A1Q4-06A-11R-A18T-07	MITF-low	MITF-low	Centroblast	IL10_plus	BRAF
TCGA-D3-A1Q5-06A-11R-A18T-07	MITF-low	MITF-low	Centroblast	IL10_plus	BRAF
TCGA-D3-A1Q6-06A-11R-A18T-07	MITF-low	MITF-low	Plasmablast	IL10_plus	Multiple
TCGA-D3-A1Q7-06A-11R-A18T-07	Immune	Immune	Memory	IL10_minus	BRAF
TCGA-D3-A1Q8-06A-11R-A18T-07	MITF-low	MITF-low	Memory	IL10_plus	RAS
TCGA-D3-A1Q9-06A-11R-A18T-07	Immune	Immune	Plasmablast	IL10_plus	BRAF
TCGA-D3-A1QA-06A-11R-A18T-07	Keratin	Immune	Centroblast	IL10_plus	Multiple
TCGA-D3-A1QA-07A-11R-A37K-07	Immune	NA	Centroblast	IL10_plus	NA
TCGA-D3-A1QB-06A-11R-A18T-07	Immune	Immune	Memory	IL10_minus	RAS
TCGA-D3-A2J6-06A-11R-A18T-07	Keratin	Keratin	Centrocyte	IL10_plus	NF1
TCGA-D3-A2J7-06A-11R-A18T-07	Immune	Immune	Memory	IL10_minus	BRAF
TCGA-D3-A2J8-06A-11R-A18T-07	Immune	Immune	Memory	IL10_minus	Multiple
TCGA-D3-A2J9-06A-11R-A18T-07	Immune	Immune	Memory	IL10_minus	BRAF
TCGA-D3-A2JA-06A-11R-A18T-07	MITF-low	MITF-low	Memory	IL10_minus	Multiple
TCGA-D3-A2JB-06A-11R-A18T-07	Immune	Immune	Centrocyte	IL10_minus	NA
TCGA-D3-A2JC-06A-11R-A18T-07	Immune	Immune	Centrocyte	IL10_minus	NA
TCGA-D3-A2JD-06A-11R-A18T-07	Immune	Immune	Centrocyte	IL10_minus	BRAF
TCGA-D3-A2JE-06A-11R-A37K-07	MITF-low	NA	Centroblast	IL10_plus	BRAF
TCGA-D3-A2JF-06A-11R-A18S-07	Immune	Immune	Memory	IL10_minus	Multiple
TCGA-D3-A2JG-06A-11R-A18T-07	Keratin	Keratin	Naive	IL10_plus	Multiple
TCGA-D3-A2JH-06A-11R-A18T-07	Immune	Immune	Centrocyte	IL10_minus	BRAF
TCGA-D3-A2JK-06A-11R-A18S-07	Keratin	Keratin	Centrocyte	IL10_plus	BRAF
TCGA-D3-A2JL-06A-11R-A18S-07	Immune	Immune	Memory	IL10_minus	Multiple
TCGA-D3-A2JN-06A-11R-A18S-07	MITF-low	Immune	Centrocyte	IL10_plus	BRAF
TCGA-D3-A2JO-06A-11R-A18S-07	Immune	Immune	Centrocyte	IL10_minus	RAS
TCGA-D3-A2JP-06A-11R-A18S-07	Immune	Immune	Memory	IL10_plus	BRAF
TCGA-D3-A3BZ-06A-12R-A18S-07	Immune	Immune	Memory	IL10_plus	NA
TCGA-D3-A3C1-06A-12R-A18S-07	MITF-low	Immune	Centrocyte	IL10_minus	BRAF
TCGA-D3-A3C3-06A-12R-A18S-07	Immune	Immune	Centrocyte	IL10_plus	BRAF
TCGA-D3-A3C6-06A-12R-A18U-07	MITF-low	MITF-low	Centrocyte	IL10_plus	Multiple
TCGA-D3-A3C7-06A-11R-A18U-07	MITF-low	MITF-low	Centrocyte	IL10_minus	Multiple
TCGA-D3-A3C8-06A-12R-A18S-07	Immune	Immune	Memory	IL10_minus	NA
TCGA-D3-A3CB-06A-11R-A18S-07	Immune	Immune	Memory	IL10_minus	BRAF
TCGA-D3-A3CC-06A-11R-A18S-07	Keratin	Keratin	Centrocyte	IL10_plus	NA
TCGA-D3-A3CE-06A-11R-A18S-07	Immune	Immune	Centrocyte	IL10_plus	Multiple
TCGA-D3-A3CF-06A-11R-A18T-07	Immune	Immune	Centrocyte	IL10_minus	NA
TCGA-D3-A3ML-06A-11R-A21D-07	Keratin	Keratin	Centroblast	IL10_plus	RAS
TCGA-D3-A3MO-06A-11R-A21D-07	MITF-low	MITF-low	Centroblast	IL10_plus	BRAF
TCGA-D3-A3MR-06A-11R-A21D-07	Immune	Immune	Memory	IL10_minus	BRAF
TCGA-D3-A3MU-06A-11R-A21D-07	Immune	Immune	Memory	IL10_minus	BRAF
TCGA-D3-A3MV-06A-11R-A21D-07	MITF-low	MITF-low	Naive	IL10_plus	RAS
TCGA-D3-A51E-06A-11R-A266-07	Immune	Immune	Centrocyte	IL10_minus	RAS
TCGA-D3-A51F-06A-11R-A266-07	Immune	Immune	Memory	IL10_minus	BRAF
TCGA-D3-A51G-06A-11R-A266-07	MITF-low	MITF-low	Centroblast	IL10_plus	RAS
TCGA-D3-A51H-06A-12R-A266-07	Immune	Immune	Memory	IL10_minus	NA
TCGA-D3-A51J-06A-11R-A266-07	Immune	Immune	Memory	IL10_minus	BRAF
TCGA-D3-A51K-06A-11R-A266-07	Immune	Keratin	Centrocyte	IL10_plus	NA
TCGA-D3-A51N-06A-11R-A266-07	MITF-low	Immune	Memory	IL10_minus	BRAF
TCGA-D3-A51R-06A-11R-A266-07	MITF-low	MITF-low	Centroblast	IL10_plus	RAS
TCGA-D3-A51T-06A-11R-A266-07	Immune	Immune	Centrocyte	IL10_minus	RAS
TCGA-D3-A5GL-06A-11R-A27Q-07	Keratin	Keratin	Centroblast	IL10_plus	NA
TCGA-D3-A5GN-06A-11R-A27Q-07	MITF-low	MITF-low	Centrocyte	IL10_plus	BRAF
TCGA-D3-A5GO-06A-12R-A27Q-07	Immune	Immune	Memory	IL10_minus	RAS
TCGA-D3-A5GR-06A-11R-A27Q-07	Immune	Immune	Memory	IL10_plus	BRAF
TCGA-D3-A5GS-06A-11R-A27Q-07	Immune	Immune	Centrocyte	IL10_minus	BRAF
TCGA-D3-A5GT-01A-12R-A311-07	Keratin	NA	Centroblast	IL10_plus	BRAF
TCGA-D3-A5GU-06A-11R-A27Q-07	Immune	Immune	Centroblast	IL10_plus	BRAF
TCGA-D3-A8GB-06A-11R-A37K-07	Immune	NA	Memory	IL10_minus	BRAF
TCGA-D3-A8GC-06A-11R-A37K-07	MITF-low	NA	Centroblast	IL10_plus	RAS
TCGA-D3-A8GD-06A-11R-A37K-07	Immune	NA	Memory	IL10_minus	BRAF
TCGA-D3-A8GE-06A-11R-A37K-07	MITF-low	NA	Memory	IL10_minus	NA
TCGA-D3-A8GI-06A-11R-A37K-07	Keratin	NA	Centrocyte	IL10_plus	Multiple
TCGA-D3-A8GJ-06A-11R-A37K-07	Immune	NA	Memory	IL10_minus	BRAF
TCGA-D3-A8GK-06A-11R-A37K-07	Keratin	NA	Centroblast	IL10_plus	RAS
TCGA-D3-A8GL-06A-11R-A37K-07	Keratin	NA	Centroblast	IL10_plus	RAS
TCGA-D3-A8GM-06A-11R-A37K-07	Immune	NA	Centroblast	IL10_plus	NA
TCGA-D3-A8GN-06A-11R-A37K-07	Immune	NA	Centrocyte	IL10_minus	BRAF
TCGA-D3-A8GO-06A-11R-A37K-07	Immune	NA	Centrocyte	IL10_plus	BRAF
TCGA-D3-A8GP-06A-11R-A37K-07	Keratin	NA	Centroblast	IL10_plus	NA
TCGA-D3-A8GQ-06A-11R-A37K-07	MITF-low	NA	Centroblast	IL10_plus	RAS
TCGA-D3-A8GR-06A-11R-A37K-07	Keratin	NA	Centrocyte	IL10_plus	RAS
TCGA-D3-A8GS-06A-12R-A37K-07	Immune	NA	Memory	IL10_minus	BRAF
TCGA-D3-A8GV-06A-11R-A37K-07	MITF-low	NA	Centroblast	IL10_plus	BRAF
TCGA-D9-A148-06A-11R-A18S-07	Immune	Immune	Centrocyte	IL10_plus	Multiple
TCGA-D9-A149-06A-11R-A18S-07	Immune	Immune	Centrocyte	IL10_minus	NA
TCGA-D9-A1JW-06A-11R-A18S-07	Immune	Immune	Centrocyte	IL10_minus	NA
TCGA-D9-A1JX-06A-11R-A18S-07	Immune	Immune	Centrocyte	IL10_minus	BRAF
TCGA-D9-A1X3-06A-11R-A18S-07	Keratin	NA	Centroblast	IL10_plus	NF1
TCGA-D9-A3Z1-06A-11R-A239-07	Immune	Immune	Memory	IL10_minus	RAS
TCGA-D9-A3Z3-06A-11R-A239-07	Immune	Immune	Centrocyte	IL10_minus	BRAF
TCGA-D9-A3Z4-01A-11R-A239-07	Immune	Immune	Memory	IL10_plus	RAS
TCGA-D9-A4Z2-01A-11R-A24X-07	MITF-low	MITF-low	Centroblast	IL10_plus	BRAF
TCGA-D9-A4Z3-01A-11R-A266-07	MITF-low	MITF-low	Memory	IL10_plus	RAS
TCGA-D9-A4Z5-01A-11R-A266-07	MITF-low	Keratin	Centrocyte	IL10_plus	NA
TCGA-D9-A4Z6-06A-12R-A266-07	Keratin	NA	Centroblast	IL10_plus	NA
TCGA-D9-A6E9-06A-12R-A311-07	Immune	NA	Memory	IL10_minus	BRAF
TCGA-D9-A6EA-06A-11R-A311-07	Keratin	NA	Naive	IL10_plus	RAS
TCGA-D9-A6EC-06A-11R-A311-07	Keratin	NA	Centroblast	IL10_plus	NF1
TCGA-D9-A6EG-06A-12R-A32P-07	Keratin	NA	Centroblast	IL10_plus	BRAF
TCGA-DA-A1HV-06A-21R-A18S-07	Immune	Immune	Memory	IL10_minus	RAS
TCGA-DA-A1HW-06A-11R-A18U-07	Immune	Immune	Centrocyte	IL10_plus	BRAF
TCGA-DA-A1HY-06A-11R-A18T-07	MITF-low	MITF-low	Plasmablast	IL10_plus	BRAF
TCGA-DA-A1I0-06A-11R-A20F-07	Immune	Immune	Centrocyte	IL10_minus	BRAF
TCGA-DA-A1I1-06A-12R-A18U-07	Immune	Immune	Memory	IL10_minus	RAS
TCGA-DA-A1I2-06A-21R-A18U-07	MITF-low	Immune	Naive	IL10_minus	BRAF
TCGA-DA-A1I4-06A-11R-A18U-07	MITF-low	Keratin	Centrocyte	IL10_plus	BRAF
TCGA-DA-A1I5-06A-11R-A18T-07	Immune	Immune	Centrocyte	IL10_plus	BRAF
TCGA-DA-A1I7-06A-22R-A18S-07	MITF-low	MITF-low	Plasmablast	IL10_plus	BRAF
TCGA-DA-A1I8-06A-11R-A18T-07	MITF-low	MITF-low	Plasmablast	IL10_plus	BRAF
TCGA-DA-A1IA-06A-11R-A18S-07	Keratin	Keratin	Centrocyte	IL10_minus	NA
TCGA-DA-A1IB-06A-11R-A18S-07	Immune	Immune	Memory	IL10_minus	NF1
TCGA-DA-A1IC-06A-11R-A18S-07	Keratin	Keratin	Centrocyte	IL10_plus	NF1
TCGA-DA-A3F2-06A-11R-A20F-07	Immune	Immune	Memory	IL10_minus	NA
TCGA-DA-A3F3-06A-11R-A20F-07	MITF-low	Immune	Centroblast	IL10_plus	RAS
TCGA-DA-A3F5-06A-11R-A20F-07	MITF-low	MITF-low	Centroblast	IL10_plus	BRAF
TCGA-DA-A3F8-06A-11R-A20F-07	Immune	Immune	Memory	IL10_minus	Multiple
TCGA-DA-A95V-06A-11R-A37K-07	Immune	NA	Centrocyte	IL10_minus	NF1
TCGA-DA-A95W-06A-11R-A37K-07	MITF-low	NA	Centroblast	IL10_plus	BRAF
TCGA-DA-A95X-06A-11R-A37K-07	MITF-low	NA	Centroblast	IL10_plus	Multiple
TCGA-DA-A95Y-06A-11R-A37K-07	Keratin	NA	Centrocyte	IL10_plus	NA
TCGA-DA-A95Z-06A-11R-A37K-07	Keratin	NA	Centroblast	IL10_plus	NF1
TCGA-DA-A960-01A-11R-A37K-07	Keratin	NA	Centroblast	IL10_plus	RAS
TCGA-EB-A1NK-01A-11R-A18T-07	Keratin	Keratin	Centrocyte	IL10_plus	RAS
TCGA-EB-A24C-01A-11R-A18T-07	Keratin	Keratin	Naive	IL10_plus	BRAF
TCGA-EB-A24D-01A-11R-A18T-07	Keratin	Keratin	Centroblast	IL10_plus	Multiple
TCGA-EB-A299-01A-21R-A18U-07	Keratin	Keratin	Centrocyte	IL10_plus	BRAF
TCGA-EB-A3HV-01A-11R-A21D-07	Keratin	Keratin	Centrocyte	IL10_plus	BRAF
TCGA-EB-A3XB-01A-11R-A239-07	Keratin	Keratin	Centroblast	IL10_plus	BRAF
TCGA-EB-A3XC-01A-11R-A239-07	Keratin	Keratin	Centroblast	IL10_plus	BRAF
TCGA-EB-A3XD-01A-22R-A239-07	Keratin	Keratin	Centrocyte	IL10_plus	BRAF
TCGA-EB-A3XE-01A-12R-A239-07	Keratin	Keratin	Centrocyte	IL10_plus	BRAF
TCGA-EB-A3XF-01A-31R-A239-07	Keratin	Keratin	Plasmablast	IL10_plus	BRAF
TCGA-EB-A3Y6-01A-21R-A239-07	Keratin	Keratin	Centrocyte	IL10_plus	Multiple
TCGA-EB-A3Y7-01A-11R-A239-07	Keratin	Keratin	Centrocyte	IL10_plus	NA
TCGA-EB-A41A-01A-11R-A24X-07	Keratin	Keratin	Centroblast	IL10_plus	NF1
TCGA-EB-A41B-01A-11R-A24X-07	Keratin	Keratin	Centrocyte	IL10_plus	RAS
TCGA-EB-A42Y-01A-12R-A24X-07	Keratin	Keratin	Centroblast	IL10_plus	NA
TCGA-EB-A42Z-01A-12R-A24X-07	MITF-low	MITF-low	Plasmablast	IL10_plus	BRAF
TCGA-EB-A430-01A-11R-A24X-07	Keratin	Immune	Centrocyte	IL10_plus	BRAF
TCGA-EB-A431-01A-11R-A266-07	Keratin	Keratin	Centroblast	IL10_plus	BRAF
TCGA-EB-A44N-01A-11R-A266-07	Keratin	Keratin	Centrocyte	IL10_plus	BRAF
TCGA-EB-A44O-01A-11R-A266-07	Keratin	Keratin	Centroblast	IL10_plus	RAS
TCGA-EB-A44P-01A-11R-A266-07	Keratin	Keratin	Centrocyte	IL10_plus	BRAF
TCGA-EB-A44Q-06A-11R-A266-07	Immune	Immune	Memory	IL10_minus	RAS
TCGA-EB-A44R-06A-41R-A266-07	Immune	Keratin	Centroblast	IL10_plus	RAS
TCGA-EB-A4IQ-01A-12R-A266-07	Keratin	Keratin	Centrocyte	IL10_plus	NA
TCGA-EB-A4IS-01A-21R-A266-07	Immune	Immune	Memory	IL10_minus	BRAF
TCGA-EB-A4OY-01A-11R-A266-07	Keratin	Keratin	Centrocyte	IL10_plus	NA
TCGA-EB-A4OZ-01A-12R-A266-07	Immune	Keratin	Centrocyte	IL10_minus	BRAF
TCGA-EB-A4P0-01A-41R-A266-07	Keratin	Immune	Centrocyte	IL10_plus	BRAF
TCGA-EB-A4XL-01A-11R-A27Q-07	Keratin	Keratin	Centrocyte	IL10_plus	RAS
TCGA-EB-A51B-01A-11R-A27Q-07	Keratin	Keratin	Naive	IL10_plus	NA
TCGA-EB-A550-01A-61R-A27Q-07	Keratin	Keratin	Centrocyte	IL10_plus	BRAF
TCGA-EB-A551-01A-21R-A27Q-07	Immune	Immune	Memory	IL10_minus	RAS
TCGA-EB-A553-01A-12R-A27Q-07	Keratin	Keratin	Centrocyte	IL10_plus	BRAF
TCGA-EB-A57M-01A-51R-A311-07	Keratin	NA	Centrocyte	IL10_plus	NA
TCGA-EB-A5FP-01A-11R-A27Q-07	Keratin	Keratin	Centroblast	IL10_plus	BRAF
TCGA-EB-A5KH-06A-11R-A27Q-07	Keratin	Keratin	Centrocyte	IL10_plus	NA
TCGA-EB-A5SE-01A-11R-A311-07	Keratin	NA	Centroblast	IL10_plus	BRAF
TCGA-EB-A5SF-01A-11R-A311-07	Keratin	NA	Centrocyte	IL10_plus	NA
TCGA-EB-A5SG-06A-11R-A311-07	Immune	NA	Memory	IL10_minus	RAS
TCGA-EB-A5SH-06A-11R-A311-07	Keratin	NA	Centrocyte	IL10_plus	NA
TCGA-EB-A5UL-06A-11R-A311-07	Immune	NA	Centroblast	IL10_plus	RAS
TCGA-EB-A5UM-01A-11R-A311-07	Immune	NA	Centrocyte	IL10_plus	RAS
TCGA-EB-A5UN-06A-11R-A311-07	Keratin	NA	Plasmablast	IL10_plus	BRAF
TCGA-EB-A5VU-01A-21R-A32P-07	MITF-low	NA	Centroblast	IL10_plus	RAS
TCGA-EB-A5VV-06A-11R-A32P-07	Immune	NA	Memory	IL10_minus	NA
TCGA-EB-A6L9-06A-11R-A32P-07	Immune	NA	Memory	IL10_minus	NA
TCGA-EB-A6QY-01A-12R-A32P-07	Keratin	NA	Centroblast	IL10_plus	BRAF
TCGA-EB-A6QZ-01A-12R-A32P-07	Keratin	NA	Centrocyte	IL10_plus	BRAF
TCGA-EB-A6R0-01A-12R-A32P-07	Immune	NA	Centrocyte	IL10_plus	BRAF
TCGA-EB-A82B-01A-11R-A352-07	Immune	NA	Centrocyte	IL10_plus	NF1
TCGA-EB-A82C-01A-11R-A352-07	Keratin	NA	Centrocyte	IL10_plus	NA
TCGA-EB-A85I-01A-11R-A352-07	Immune	NA	Centrocyte	IL10_minus	BRAF
TCGA-EB-A85J-01A-12R-A352-07	Immune	NA	Centrocyte	IL10_minus	RAS
TCGA-EB-A97M-01A-11R-A38C-07	Keratin	NA	Memory	IL10_minus	NA
TCGA-EE-A17X-06A-11R-A18S-07	Keratin	Keratin	Centroblast	IL10_plus	RAS
TCGA-EE-A17Y-06A-11R-A18T-07	MITF-low	MITF-low	Centrocyte	IL10_plus	BRAF
TCGA-EE-A17Z-06A-11R-A18S-07	Keratin	Keratin	Centroblast	IL10_plus	NF1
TCGA-EE-A180-06A-11R-A21D-07	Keratin	Keratin	Centroblast	IL10_plus	NF1
TCGA-EE-A181-06A-11R-A18S-07	Immune	Immune	Memory	IL10_minus	NF1
TCGA-EE-A182-06A-11R-A18T-07	Keratin	Keratin	Centrocyte	IL10_minus	NF1
TCGA-EE-A183-06A-11R-A18S-07	Immune	Immune	Memory	IL10_minus	Multiple
TCGA-EE-A184-06A-11R-A18S-07	Immune	Immune	Centrocyte	IL10_minus	Multiple
TCGA-EE-A185-06A-11R-A18S-07	Keratin	Keratin	Centrocyte	IL10_plus	RAS
TCGA-EE-A20B-06A-11R-A18U-07	MITF-low	Immune	Centrocyte	IL10_plus	BRAF
TCGA-EE-A20C-06A-11R-A18S-07	MITF-low	MITF-low	Centroblast	IL10_plus	Multiple
TCGA-EE-A20F-06A-21R-A18S-07	Immune	Immune	Centrocyte	IL10_plus	BRAF
TCGA-EE-A20H-06A-11R-A18S-07	MITF-low	MITF-low	Centroblast	IL10_plus	BRAF
TCGA-EE-A20I-06A-11R-A18U-07	Keratin	Immune	Centrocyte	IL10_plus	NA
TCGA-EE-A29A-06A-12R-A18U-07	MITF-low	MITF-low	Centroblast	IL10_plus	BRAF
TCGA-EE-A29B-06A-11R-A18U-07	Keratin	Keratin	Centroblast	IL10_plus	RAS
TCGA-EE-A29C-06A-21R-A18S-07	Keratin	Immune	Centroblast	IL10_plus	BRAF
TCGA-EE-A29D-06A-11R-A18T-07	Keratin	Keratin	Centroblast	IL10_plus	NA
TCGA-EE-A29E-06A-11R-A18T-07	Keratin	Keratin	Centroblast	IL10_plus	Multiple
TCGA-EE-A29G-06A-12R-A18T-07	Keratin	Keratin	Centrocyte	IL10_plus	RAS
TCGA-EE-A29H-06A-12R-A18S-07	Immune	Immune	Centrocyte	IL10_plus	BRAF
TCGA-EE-A29L-06A-12R-A18S-07	Keratin	Keratin	Centroblast	IL10_plus	Multiple
TCGA-EE-A29M-06A-11R-A18T-07	Immune	Immune	Centrocyte	IL10_plus	BRAF
TCGA-EE-A29N-06A-12R-A18S-07	Immune	Immune	Memory	IL10_plus	NF1
TCGA-EE-A29P-06A-11R-A18T-07	Immune	Immune	Memory	IL10_minus	Multiple
TCGA-EE-A29Q-06A-11R-A18T-07	MITF-low	MITF-low	Centrocyte	IL10_plus	RAS
TCGA-EE-A29R-06A-11R-A18T-07	MITF-low	MITF-low	Naive	IL10_plus	RAS
TCGA-EE-A29S-06A-11R-A18T-07	Immune	Immune	Memory	IL10_minus	Multiple
TCGA-EE-A29T-06A-11R-A18T-07	Immune	Immune	Memory	IL10_minus	BRAF
TCGA-EE-A29V-06A-12R-A18S-07	Keratin	Keratin	Centroblast	IL10_plus	Multiple
TCGA-EE-A29W-06A-11R-A18U-07	MITF-low	MITF-low	Centroblast	IL10_plus	BRAF
TCGA-EE-A29X-06A-11R-A18T-07	Immune	Immune	Centrocyte	IL10_minus	RAS
TCGA-EE-A2A0-06A-11R-A18T-07	Immune	Immune	Memory	IL10_plus	NA
TCGA-EE-A2A1-06A-11R-A18T-07	Immune	Immune	Memory	IL10_minus	RAS
TCGA-EE-A2A2-06A-11R-A18T-07	Immune	Immune	Centrocyte	IL10_plus	RAS
TCGA-EE-A2A5-06A-11R-A18T-07	MITF-low	MITF-low	Centroblast	IL10_plus	Multiple
TCGA-EE-A2A6-06A-11R-A18T-07	Immune	Immune	Memory	IL10_minus	BRAF
TCGA-EE-A2GB-06A-11R-A18T-07	MITF-low	Keratin	Plasmablast	IL10_plus	BRAF
TCGA-EE-A2GC-06A-11R-A18T-07	Immune	Immune	Memory	IL10_minus	NF1
TCGA-EE-A2GD-06A-11R-A18T-07	MITF-low	Immune	Centrocyte	IL10_minus	RAS
TCGA-EE-A2GE-06A-11R-A18T-07	Immune	Immune	Memory	IL10_minus	BRAF
TCGA-EE-A2GH-06A-11R-A18T-07	Immune	Immune	Memory	IL10_plus	Multiple
TCGA-EE-A2GI-06A-11R-A18T-07	Immune	Immune	Centrocyte	IL10_plus	NF1
TCGA-EE-A2GJ-06A-11R-A18U-07	Immune	Immune	Memory	IL10_minus	RAS
TCGA-EE-A2GK-06A-11R-A18S-07	Immune	Immune	Memory	IL10_minus	NA
TCGA-EE-A2GL-06A-11R-A18S-07	Immune	Immune	Memory	IL10_minus	RAS
TCGA-EE-A2GM-06B-11R-A18S-07	MITF-low	MITF-low	Centrocyte	IL10_plus	Multiple
TCGA-EE-A2GN-06A-11R-A18S-07	MITF-low	Keratin	Centroblast	IL10_plus	Multiple
TCGA-EE-A2GO-06A-11R-A18S-07	MITF-low	MITF-low	Centrocyte	IL10_plus	Multiple
TCGA-EE-A2GP-06A-11R-A18S-07	MITF-low	MITF-low	Centroblast	IL10_plus	RAS
TCGA-EE-A2GR-06A-11R-A18S-07	Keratin	Keratin	Centroblast	IL10_plus	NA
TCGA-EE-A2GS-06A-12R-A18S-07	MITF-low	MITF-low	Centrocyte	IL10_plus	BRAF
TCGA-EE-A2GT-06A-12R-A18S-07	Immune	Immune	Centrocyte	IL10_minus	Multiple
TCGA-EE-A2GU-06A-11R-A18T-07	Immune	Immune	Centrocyte	IL10_minus	RAS
TCGA-EE-A2M5-06A-12R-A18S-07	MITF-low	Immune	Centroblast	IL10_plus	BRAF
TCGA-EE-A2M6-06A-12R-A18S-07	MITF-low	Immune	Centrocyte	IL10_plus	BRAF
TCGA-EE-A2M7-06A-11R-A18U-07	MITF-low	Immune	Memory	IL10_minus	BRAF
TCGA-EE-A2M8-06A-12R-A18S-07	Immune	Immune	Memory	IL10_minus	BRAF
TCGA-EE-A2MC-06A-12R-A18S-07	Immune	Immune	Memory	IL10_plus	RAS
TCGA-EE-A2MD-06A-11R-A18T-07	Immune	Keratin	Centroblast	IL10_plus	Multiple
TCGA-EE-A2ME-06A-11R-A18T-07	Immune	Immune	Memory	IL10_minus	BRAF
TCGA-EE-A2MF-06A-11R-A21D-07	Immune	Immune	Memory	IL10_minus	RAS
TCGA-EE-A2MG-06A-11R-A18T-07	Immune	Immune	Memory	IL10_minus	BRAF
TCGA-EE-A2MH-06A-11R-A18S-07	Immune	Immune	Centrocyte	IL10_minus	BRAF
TCGA-EE-A2MI-06A-11R-A18U-07	MITF-low	Immune	Memory	IL10_minus	NA
TCGA-EE-A2MJ-06A-11R-A18S-07	Immune	Immune	Memory	IL10_minus	NF1
TCGA-EE-A2MK-06A-11R-A18S-07	Immune	Immune	Memory	IL10_minus	BRAF
TCGA-EE-A2ML-06A-11R-A18S-07	Immune	Immune	Memory	IL10_minus	RAS
TCGA-EE-A2MM-06A-11R-A18S-07	MITF-low	Immune	Centroblast	IL10_minus	Multiple
TCGA-EE-A2MN-06A-11R-A18S-07	Immune	Immune	Memory	IL10_minus	RAS
TCGA-EE-A2MP-06A-11R-A18S-07	Immune	Immune	Centrocyte	IL10_plus	BRAF
TCGA-EE-A2MQ-06A-11R-A18S-07	MITF-low	Immune	Centrocyte	IL10_plus	Multiple
TCGA-EE-A2MR-06A-11R-A18S-07	Immune	Immune	Memory	IL10_minus	NA
TCGA-EE-A2MS-06A-11R-A18S-07	MITF-low	MITF-low	Centroblast	IL10_plus	NA
TCGA-EE-A2MT-06A-11R-A18S-07	Keratin	Keratin	Centroblast	IL10_plus	RAS
TCGA-EE-A2MU-06A-21R-A18S-07	Immune	Immune	Memory	IL10_minus	RAS
TCGA-EE-A3AA-06A-11R-A18S-07	Immune	Immune	Centrocyte	IL10_minus	Multiple
TCGA-EE-A3AB-06A-11R-A18S-07	MITF-low	MITF-low	Memory	IL10_plus	BRAF
TCGA-EE-A3AC-06A-11R-A18S-07	Immune	Immune	Memory	IL10_minus	Multiple
TCGA-EE-A3AD-06A-11R-A18S-07	Keratin	Keratin	Plasmablast	IL10_plus	Multiple
TCGA-EE-A3AE-06A-11R-A18S-07	Immune	Immune	Centrocyte	IL10_minus	NA
TCGA-EE-A3AF-06A-11R-A18S-07	Immune	Immune	Centrocyte	IL10_minus	BRAF
TCGA-EE-A3AG-06A-31R-A18S-07	MITF-low	MITF-low	Centroblast	IL10_plus	Multiple
TCGA-EE-A3AH-06A-11R-A18S-07	MITF-low	MITF-low	Centroblast	IL10_plus	Multiple
TCGA-EE-A3J3-06A-11R-A20F-07	MITF-low	Immune	Centroblast	IL10_plus	BRAF
TCGA-EE-A3J4-06A-11R-A20F-07	Keratin	Immune	Centroblast	IL10_plus	BRAF
TCGA-EE-A3J5-06A-11R-A20F-07	Immune	Immune	Centrocyte	IL10_minus	NA
TCGA-EE-A3J7-06A-11R-A20F-07	MITF-low	MITF-low	Centroblast	IL10_plus	RAS
TCGA-EE-A3J8-06A-11R-A20F-07	MITF-low	MITF-low	Centroblast	IL10_plus	RAS
TCGA-EE-A3JA-06A-11R-A20F-07	Immune	Immune	Memory	IL10_minus	RAS
TCGA-EE-A3JB-06A-11R-A21D-07	MITF-low	MITF-low	Centrocyte	IL10_plus	BRAF
TCGA-EE-A3JD-06A-11R-A20F-07	Immune	Immune	Memory	IL10_minus	NA
TCGA-EE-A3JE-06A-11R-A20F-07	Immune	Immune	Memory	IL10_minus	BRAF
TCGA-EE-A3JH-06A-11R-A21D-07	Immune	Immune	Memory	IL10_minus	BRAF
TCGA-EE-A3JI-06A-11R-A21D-07	MITF-low	Immune	Centroblast	IL10_plus	RAS
TCGA-ER-A193-06A-12R-A18S-07	Immune	Immune	Memory	IL10_minus	BRAF
TCGA-ER-A194-01A-11R-A18U-07	Immune	Immune	Centrocyte	IL10_minus	RAS
TCGA-ER-A195-06A-11R-A18U-07	Immune	Immune	Centrocyte	IL10_plus	RAS
TCGA-ER-A196-01A-11R-A18T-07	Keratin	Keratin	Centrocyte	IL10_plus	NF1
TCGA-ER-A197-06A-32R-A18S-07	Immune	Keratin	Memory	IL10_plus	NA
TCGA-ER-A198-06A-11R-A18T-07	Immune	Immune	Centroblast	IL10_plus	BRAF
TCGA-ER-A199-06A-11R-A18T-07	Immune	Immune	Memory	IL10_minus	RAS
TCGA-ER-A19A-06A-21R-A18U-07	Immune	Immune	Memory	IL10_minus	NF1
TCGA-ER-A19B-06A-11R-A18S-07	MITF-low	MITF-low	Centroblast	IL10_plus	Multiple
TCGA-ER-A19C-06A-11R-A18S-07	Keratin	Keratin	Plasmablast	IL10_plus	Multiple
TCGA-ER-A19D-06A-11R-A18S-07	MITF-low	MITF-low	Centrocyte	IL10_plus	RAS
TCGA-ER-A19E-06A-11R-A18S-07	MITF-low	MITF-low	Centroblast	IL10_plus	BRAF
TCGA-ER-A19F-06A-11R-A18S-07	Keratin	Immune	Centrocyte	IL10_plus	NA
TCGA-ER-A19G-06A-11R-A18U-07	Immune	Immune	Centrocyte	IL10_minus	BRAF
TCGA-ER-A19H-06A-12R-A18S-07	MITF-low	Immune	Centrocyte	IL10_plus	Multiple
TCGA-ER-A19J-06A-11R-A18S-07	MITF-low	Keratin	Plasmablast	IL10_plus	BRAF
TCGA-ER-A19K-01A-21R-A18T-07	Keratin	Keratin	Centrocyte	IL10_plus	BRAF
TCGA-ER-A19L-06A-12R-A18S-07	MITF-low	MITF-low	Naive	IL10_plus	NF1
TCGA-ER-A19M-06A-61R-A239-07	Immune	Immune	Centroblast	IL10_plus	BRAF
TCGA-ER-A19N-06A-11R-A18S-07	Immune	Immune	Memory	IL10_minus	Multiple
TCGA-ER-A19O-06A-11R-A18S-07	Immune	Immune	Memory	IL10_minus	BRAF
TCGA-ER-A19P-06A-11R-A18S-07	Immune	Immune	Memory	IL10_minus	Multiple
TCGA-ER-A19Q-06A-11R-A18U-07	Immune	Immune	Centrocyte	IL10_minus	BRAF
TCGA-ER-A19S-06A-11R-A18U-07	Immune	Immune	Memory	IL10_minus	BRAF
TCGA-ER-A19T-01A-11R-A18T-07	MITF-low	NA	Centroblast	IL10_plus	NA
TCGA-ER-A19T-06A-11R-A18U-07	Immune	Immune	Centrocyte	IL10_minus	NA
TCGA-ER-A19W-06A-41R-A239-07	Immune	Immune	Memory	IL10_minus	RAS
TCGA-ER-A1A1-06A-11R-A18U-07	Immune	Immune	Memory	IL10_minus	Multiple
TCGA-ER-A2NC-06A-11R-A18T-07	MITF-low	MITF-low	Centrocyte	IL10_plus	Multiple
TCGA-ER-A2ND-06A-11R-A18T-07	Keratin	Keratin	Centrocyte	IL10_plus	BRAF
TCGA-ER-A2NE-06A-21R-A18T-07	Keratin	Keratin	Centroblast	IL10_plus	RAS
TCGA-ER-A2NF-01A-11R-A18T-07	Immune	NA	Centrocyte	IL10_plus	NF1
TCGA-ER-A2NF-06A-11R-A18T-07	Immune	Immune	Plasmablast	IL10_minus	NA
TCGA-ER-A2NG-06A-11R-A18T-07	Immune	Immune	Centrocyte	IL10_minus	BRAF
TCGA-ER-A2NH-06A-11R-A18S-07	Immune	Immune	Memory	IL10_minus	RAS
TCGA-ER-A3ES-06A-11R-A20F-07	Keratin	Keratin	Centroblast	IL10_plus	NA
TCGA-ER-A3ET-06A-11R-A20F-07	Immune	Immune	Memory	IL10_minus	NA
TCGA-ER-A3EV-06A-11R-A20F-07	Keratin	Keratin	Centroblast	IL10_plus	NA
TCGA-ER-A3PL-06A-11R-A239-07	MITF-low	MITF-low	Naive	IL10_plus	BRAF
TCGA-ER-A42H-01A-11R-A24X-07	MITF-low	Keratin	Centroblast	IL10_plus	NA
TCGA-ER-A42K-06A-11R-A24X-07	MITF-low	MITF-low	Naive	IL10_plus	BRAF
TCGA-ER-A42L-06A-11R-A24X-07	Immune	Immune	Memory	IL10_plus	BRAF
TCGA-FR-A2OS-01A-11R-A21D-07	MITF-low	Keratin	Centrocyte	IL10_plus	NA
TCGA-FR-A3R1-01A-11R-A239-07	Immune	Immune	Centroblast	IL10_minus	NF1
TCGA-FR-A3YN-06A-11R-A239-07	Immune	Immune	Memory	IL10_minus	RAS
TCGA-FR-A3YO-06A-11R-A239-07	Keratin	Keratin	Centrocyte	IL10_plus	RAS
TCGA-FR-A44A-06A-11R-A24X-07	Immune	Immune	Centrocyte	IL10_minus	BRAF
TCGA-FR-A69P-06A-21R-A311-07	MITF-low	NA	Centroblast	IL10_plus	RAS
TCGA-FR-A726-01A-11R-A32P-07	Keratin	NA	Centroblast	IL10_plus	NF1
TCGA-FR-A728-01A-11R-A32P-07	Immune	NA	Centrocyte	IL10_plus	BRAF
TCGA-FR-A729-06A-11R-A352-07	Immune	NA	Memory	IL10_plus	BRAF
TCGA-FR-A7U8-06A-21R-A352-07	Keratin	NA	Centroblast	IL10_plus	RAS
TCGA-FR-A7U9-06A-11R-A352-07	Immune	NA	Centrocyte	IL10_minus	NF1
TCGA-FR-A7UA-06A-32R-A352-07	Immune	NA	Memory	IL10_minus	BRAF
TCGA-FR-A8YC-06A-11R-A37K-07	MITF-low	NA	Centroblast	IL10_plus	NF1
TCGA-FR-A8YD-06A-11R-A37K-07	Keratin	NA	Centrocyte	IL10_plus	NF1
TCGA-FR-A8YE-06A-11R-A37K-07	Immune	NA	Memory	IL10_minus	BRAF
TCGA-FS-A1YW-06A-11R-A18T-07	MITF-low	Immune	Naive	IL10_plus	RAS
TCGA-FS-A1YX-06A-11R-A18T-07	MITF-low	MITF-low	Centrocyte	IL10_plus	BRAF
TCGA-FS-A1YY-06A-11R-A18T-07	Keratin	Keratin	Centrocyte	IL10_plus	BRAF
TCGA-FS-A1Z0-06A-11R-A18T-07	Immune	Immune	Centrocyte	IL10_plus	RAS
TCGA-FS-A1Z3-06A-11R-A18T-07	MITF-low	MITF-low	Centrocyte	IL10_plus	RAS
TCGA-FS-A1Z4-06A-11R-A18T-07	Immune	Immune	Memory	IL10_plus	NA
TCGA-FS-A1Z7-06A-11R-A18T-07	MITF-low	MITF-low	Centroblast	IL10_plus	BRAF
TCGA-FS-A1ZA-06A-11R-A18T-07	MITF-low	Immune	Centrocyte	IL10_plus	NF1
TCGA-FS-A1ZB-06A-12R-A18S-07	Keratin	Keratin	Centrocyte	IL10_plus	RAS
TCGA-FS-A1ZC-06A-11R-A18T-07	MITF-low	MITF-low	Centroblast	IL10_plus	BRAF
TCGA-FS-A1ZD-06A-11R-A18T-07	MITF-low	MITF-low	Centroblast	IL10_plus	BRAF
TCGA-FS-A1ZE-06A-11R-A18T-07	Keratin	Keratin	Centroblast	IL10_plus	RAS
TCGA-FS-A1ZF-06A-12R-A18S-07	MITF-low	MITF-low	Centrocyte	IL10_plus	BRAF
TCGA-FS-A1ZG-06A-11R-A18T-07	Keratin	Keratin	Naive	IL10_plus	Multiple
TCGA-FS-A1ZH-06A-11R-A18T-07	MITF-low	MITF-low	Centrocyte	IL10_plus	BRAF
TCGA-FS-A1ZJ-06A-12R-A18S-07	MITF-low	Keratin	Centroblast	IL10_plus	NA
TCGA-FS-A1ZK-06A-11R-A18T-07	Keratin	Keratin	Centroblast	IL10_plus	RAS
TCGA-FS-A1ZM-06A-12R-A18S-07	MITF-low	Immune	Memory	IL10_plus	Multiple
TCGA-FS-A1ZN-01A-11R-A18T-07	Keratin	Keratin	Naive	IL10_plus	Multiple
TCGA-FS-A1ZP-06A-11R-A18T-07	Immune	Immune	Memory	IL10_plus	Multiple
TCGA-FS-A1ZQ-06A-11R-A18U-07	Keratin	Keratin	Centrocyte	IL10_plus	RAS
TCGA-FS-A1ZR-06A-21R-A18U-07	MITF-low	Keratin	Centroblast	IL10_plus	BRAF
TCGA-FS-A1ZS-06A-12R-A18T-07	MITF-low	MITF-low	Centrocyte	IL10_plus	BRAF
TCGA-FS-A1ZT-06A-11R-A18U-07	Immune	Immune	Centroblast	IL10_plus	RAS
TCGA-FS-A1ZU-06A-12R-A18T-07	MITF-low	Keratin	Centrocyte	IL10_plus	NF1
TCGA-FS-A1ZW-06A-12R-A18T-07	Immune	Immune	Plasmablast	IL10_minus	RAS
TCGA-FS-A1ZY-06A-11R-A18S-07	Keratin	Keratin	Naive	IL10_plus	RAS
TCGA-FS-A1ZZ-06A-11R-A18S-07	Keratin	Keratin	Centrocyte	IL10_plus	NF1
TCGA-FS-A4F0-06A-11R-A24X-07	Keratin	Keratin	Centroblast	IL10_plus	NA
TCGA-FS-A4F2-06A-11R-A24X-07	MITF-low	Immune	Centrocyte	IL10_plus	RAS
TCGA-FS-A4F4-06A-12R-A266-07	Keratin	Immune	Memory	IL10_plus	NA
TCGA-FS-A4F5-06A-11R-A266-07	MITF-low	Immune	Centrocyte	IL10_plus	RAS
TCGA-FS-A4F8-06A-11R-A266-07	Immune	Immune	Memory	IL10_minus	BRAF
TCGA-FS-A4F9-06A-11R-A24X-07	Keratin	Keratin	Centroblast	IL10_plus	RAS
TCGA-FS-A4FB-06A-11R-A266-07	MITF-low	MITF-low	Centrocyte	IL10_plus	BRAF
TCGA-FS-A4FC-06A-11R-A24X-07	Keratin	Keratin	Memory	IL10_plus	RAS
TCGA-FS-A4FD-06A-11R-A266-07	MITF-low	Keratin	Centroblast	IL10_plus	Multiple
TCGA-FW-A3I3-06A-11R-A21D-07	Keratin	Keratin	Centrocyte	IL10_plus	NA
TCGA-FW-A3R5-06A-11R-A239-07	Immune	Immune	Centroblast	IL10_plus	NF1
TCGA-FW-A3TU-06A-11R-A239-07	Keratin	Keratin	Memory	IL10_minus	NA
TCGA-FW-A3TV-06A-11R-A239-07	Immune	Immune	Centrocyte	IL10_minus	BRAF
TCGA-FW-A5DX-01A-11R-A27Q-07	MITF-low	MITF-low	Centroblast	IL10_plus	BRAF
TCGA-FW-A5DY-06A-11R-A311-07	Immune	NA	Memory	IL10_minus	BRAF
TCGA-GF-A2C7-01A-11R-A18T-07	Keratin	Keratin	Centroblast	IL10_plus	BRAF
TCGA-GF-A3OT-06A-23R-A239-07	MITF-low	Immune	Centrocyte	IL10_plus	RAS
TCGA-GF-A4EO-06A-12R-A24X-07	Immune	Immune	Memory	IL10_minus	BRAF
TCGA-GF-A6C8-06A-12R-A311-07	MITF-low	NA	Centrocyte	IL10_plus	BRAF
TCGA-GF-A6C9-06A-11R-A311-07	Immune	NA	Memory	IL10_minus	BRAF
TCGA-GF-A769-01A-32R-A32P-07	MITF-low	NA	Centroblast	IL10_plus	BRAF
TCGA-GN-A262-06A-11R-A18T-07	MITF-low	MITF-low	Centroblast	IL10_plus	BRAF
TCGA-GN-A263-01A-11R-A18T-07	Keratin	Immune	Centroblast	IL10_plus	BRAF
TCGA-GN-A264-06A-11R-A18U-07	Keratin	Keratin	Centroblast	IL10_plus	NA
TCGA-GN-A265-06A-21R-A18T-07	Immune	Immune	Memory	IL10_minus	Multiple
TCGA-GN-A266-06A-11R-A18T-07	Immune	Immune	Memory	IL10_minus	NF1
TCGA-GN-A267-06A-21R-A18T-07	Immune	Immune	Centroblast	IL10_plus	RAS
TCGA-GN-A268-06A-11R-A18T-07	Keratin	Keratin	Centroblast	IL10_plus	Multiple
TCGA-GN-A26A-06A-11R-A18T-07	MITF-low	MITF-low	Centrocyte	IL10_minus	BRAF
TCGA-GN-A26C-01A-11R-A18T-07	Immune	Immune	Memory	IL10_minus	NF1
TCGA-GN-A26D-06A-11R-A18T-07	MITF-low	Immune	Centroblast	IL10_plus	NA
TCGA-GN-A4U3-06A-11R-A32P-07	Keratin	NA	Centroblast	IL10_plus	RAS
TCGA-GN-A4U4-06A-11R-A32P-07	MITF-low	NA	Centroblast	IL10_plus	RAS
TCGA-GN-A4U5-01A-11R-A32P-07	Immune	NA	Centrocyte	IL10_plus	BRAF
TCGA-GN-A4U7-06A-21R-A32P-07	Keratin	NA	Centrocyte	IL10_plus	BRAF
TCGA-GN-A4U8-06A-11R-A32P-07	Immune	NA	Centrocyte	IL10_plus	BRAF
TCGA-GN-A4U8-11A-11R-A32P-07	Immune	NA	Memory	IL10_minus	NA
TCGA-GN-A4U9-06A-11R-A32P-07	MITF-low	NA	Centroblast	IL10_plus	RAS
TCGA-GN-A8LK-06A-11R-A37K-07	Keratin	NA	Centroblast	IL10_plus	NA
TCGA-GN-A8LL-06A-21R-A37K-07	Keratin	NA	Centrocyte	IL10_plus	NA
TCGA-GN-A8LN-01A-11R-A37K-07	MITF-low	NA	Centrocyte	IL10_plus	RAS
TCGA-GN-A9SD-06A-11R-A40A-07	Immune	NA	Centrocyte	IL10_plus	BRAF
TCGA-HR-A2OG-06A-21R-A18U-07	MITF-low	NA	Plasmablast	IL10_minus	Multiple
TCGA-HR-A2OH-06A-11R-A18U-07	Immune	NA	Memory	IL10_minus	BRAF
TCGA-HR-A5NC-01A-11R-A27Q-07	Keratin	Keratin	Centrocyte	IL10_plus	BRAF
TCGA-IH-A3EA-01A-11R-A20F-07	Keratin	Keratin	Centrocyte	IL10_plus	BRAF
TCGA-LH-A9QB-06A-11R-A38C-07	MITF-low	NA	Naive	IL10_plus	BRAF
TCGA-OD-A75X-06A-12R-A32P-07	MITF-low	NA	Centroblast	IL10_plus	BRAF
TCGA-QB-A6FS-06A-11R-A311-07	Immune	NA	Centrocyte	IL10_minus	BRAF
TCGA-QB-AA9O-06A-11R-A39D-07	Immune	NA	Centrocyte	IL10_plus	RAS
TCGA-RP-A690-06A-11R-A311-07	Keratin	NA	Naive	IL10_plus	NA
TCGA-RP-A693-06A-13R-A311-07	Immune	NA	Memory	IL10_minus	NA
TCGA-RP-A694-06A-11R-A311-07	Immune	NA	Centrocyte	IL10_plus	RAS
TCGA-RP-A695-06A-11R-A311-07	Keratin	NA	Centrocyte	IL10_plus	RAS
TCGA-RP-A6K9-06A-41R-A352-07	Immune	NA	Centrocyte	IL10_minus	NA
TCGA-W3-A824-06A-21R-A352-07	Immune	NA	Memory	IL10_minus	RAS
TCGA-W3-A825-06A-11R-A352-07	MITF-low	NA	Centrocyte	IL10_plus	RAS
TCGA-W3-A828-06A-11R-A352-07	MITF-low	NA	Centroblast	IL10_plus	NA
TCGA-W3-AA1O-06A-11R-A38C-07	Keratin	NA	Centroblast	IL10_plus	NA
TCGA-W3-AA1Q-06A-11R-A38C-07	Immune	NA	Memory	IL10_plus	BRAF
TCGA-W3-AA1R-06A-11R-A39D-07	Keratin	NA	Centroblast	IL10_plus	BRAF
TCGA-W3-AA1V-06B-11R-A40A-07	MITF-low	NA	Centroblast	IL10_plus	NF1
TCGA-W3-AA1W-06A-11R-A38C-07	Immune	NA	Memory	IL10_minus	BRAF
TCGA-W3-AA21-06A-11R-A38C-07	Keratin	NA	Centrocyte	IL10_plus	BRAF
TCGA-WE-A8JZ-06A-11R-A37K-07	MITF-low	NA	Centroblast	IL10_plus	RAS
TCGA-WE-A8K1-06A-21R-A37K-07	Immune	NA	Memory	IL10_minus	RAS
TCGA-WE-A8K4-01A-12R-A37K-07	Immune	NA	Memory	IL10_minus	NA
TCGA-WE-A8K5-06A-11R-A37K-07	Immune	NA	Centroblast	IL10_plus	BRAF
TCGA-WE-A8K6-06A-11R-A37K-07	MITF-low	NA	Plasmablast	IL10_plus	BRAF
TCGA-WE-A8ZM-06A-11R-A37K-07	MITF-low	NA	Centroblast	IL10_plus	NF1
TCGA-WE-A8ZN-06A-11R-A37K-07	Immune	NA	Memory	IL10_minus	RAS
TCGA-WE-A8ZO-06A-11R-A37K-07	Immune	NA	Memory	IL10_minus	RAS
TCGA-WE-A8ZQ-06A-41R-A37K-07	MITF-low	NA	Centroblast	IL10_plus	BRAF
TCGA-WE-A8ZR-06A-11R-A37K-07	Keratin	NA	Centroblast	IL10_plus	BRAF
TCGA-WE-A8ZT-06A-11R-A37K-07	MITF-low	NA	Naive	IL10_plus	BRAF
TCGA-WE-A8ZX-06A-11R-A37K-07	Immune	NA	Centroblast	IL10_plus	BRAF
TCGA-WE-A8ZY-06A-11R-A37K-07	Keratin	NA	Centroblast	IL10_plus	RAS
TCGA-WE-AA9Y-06A-12R-A38C-07	MITF-low	NA	Memory	IL10_plus	NA
TCGA-WE-AAA0-06A-11R-A38C-07	Immune	NA	Centrocyte	IL10_minus	BRAF
TCGA-WE-AAA3-06A-11R-A38C-07	Immune	NA	Centrocyte	IL10_plus	RAS
TCGA-WE-AAA4-06A-12R-A38C-07	Immune	NA	Centrocyte	IL10_minus	BRAF
TCGA-XV-A9VZ-01A-11R-A38C-07	Keratin	NA	Centroblast	IL10_plus	NA
TCGA-XV-A9W2-01A-11R-A39D-07	Keratin	NA	Centrocyte	IL10_plus	RAS
TCGA-XV-A9W5-01A-11R-A38C-07	MITF-low	NA	Centrocyte	IL10_plus	BRAF
TCGA-XV-AAZV-01A-11R-A40A-07	Immune	NA	Centrocyte	IL10_plus	BRAF
TCGA-XV-AAZW-01A-12R-A40A-07	Keratin	NA	Centrocyte	IL10_plus	BRAF
TCGA-XV-AAZY-01A-12R-A40A-07	Keratin	NA	Centrocyte	IL10_minus	RAS
TCGA-XV-AB01-06A-12R-A40A-07	Immune	NA	Centrocyte	IL10_minus	BRAF
TCGA-YD-A89C-06A-11R-A37K-07	MITF-low	NA	Centroblast	IL10_plus	RAS
TCGA-YD-A9TA-06A-11R-A39D-07	MITF-low	NA	Centroblast	IL10_plus	NF1
TCGA-YD-A9TB-06A-12R-A40A-07	MITF-low	NA	Centrocyte	IL10_plus	BRAF
TCGA-YG-AA3N-01A-11R-A38C-07	Immune	NA	Memory	IL10_minus	BRAF
TCGA-YG-AA3O-06A-11R-A38C-07	Keratin	NA	Centroblast	IL10_plus	BRAF
TCGA-YG-AA3P-06A-11R-A38C-07	MITF-low	NA	Centroblast	IL10_plus	NA
TCGA-Z2-A8RT-06A-11R-A37K-07	Immune	NA	Memory	IL10_minus	BRAF
TCGA-Z2-AA3S-06A-11R-A39D-07	MITF-low	NA	Centroblast	IL10_plus	NA
TCGA-Z2-AA3V-06A-11R-A39D-07	Immune	NA	Centrocyte	IL10_minus	BRAF
TCGA-ER-A2NB-01A-12R-A18S-07	NA	NA	Centrocyte	IL10_plus	RAS
